# Supplementary material for: Association of air pollution, lifestyle factors, and metabolic syndrome: a Mendelian randomization study
Source: Research Square preprint supplement (doi:10.21203/rs.3.rs-6966151/v1), 2025-07-01
Supplement: Supplementary file 1 [file 437ac4c3369d113eed3d3ada.xlsx]

## Sheet: Sheet1
	Table S1. Information of included studies and consortia.
	Table S2. Single nucleotide polymorphisms (SNPs) associated with air pollution.
	Table S3. Single nucleotide polymorphisms (SNPs) associated with lifestyle factors.
	Table S4. Detailed information of single-nucleotide polymorphism-phenotype associations using LD Link database
	Table S5.Estimates of genetical liability to air pollutants and lifestyle factors on metabolic syndrome in univaribale mendelian randomization
	Table S6.Estimates of genetical liability to air pollutants and lifestyle factors on hypertension in univaribale mendelian randomization
	Table S7.Estimates of genetical liability to air pollutants and lifestyle factors on waist circumference in univaribale mendelian randomization
	Table S8.Estimates of genetical liability to air pollutants and lifestyle factors on fasting blood glucose in univaribale mendelian randomization
	Table S9.Estimates of genetical liability to air pollutants and lifestyle factors on HDL cholesterol in univaribale mendelian randomization
	Table S10.Estimates of genetical liability to air pollutants and lifestyle factors on triglycerides in univaribale mendelian randomization
	Table S11. False discovery rate adjusted p values for all tested associations in main analysis
	Table S12.Estimates of genetical liability to exposure on metabolic syndrome and its components adjusting for BMI
	Table S13.Estimates of genetical liability to air pollutants and lifestyle factors on metabolic syndrome and its components adjusting for LDL-C
	Table S14.Effect of CRP on metabolic syndrome and its components. Effect of CRP on metabolic syndrome and its components.
	Table S15. Effect of 41 inflammatory factors on metabolic syndrome.
	Table S16. Effect of 41 inflammatory factors on hypertension.
	Table S17. Effect of 41 inflammatory factors on waist circumference.
	Table S18. Effect of 41 inflammatory factors on fasting blood glucose.
	Table S19. Effect of 41 inflammatory factors on HDL cholesterol.
	Table S20. Effect of 41 inflammatory factors on triglycerides.
	Table S21. Effect of to air pollutants and lifestyle factors on Inflammatory factors.
	Table S22. Effect of to air pollutants and lifestyle factors on CRP.
	Table S23. Estimates of air pollutants and lifestyle factors on metabolic syndrome and its components mediated by CRP.

## Sheet: Table S1
	Table S1. Information of included studies and consortia.
	Exposure/Mediator/Outcome	Consortium/First author	Participants	Web source/Pubmed ID	Unit	Adjusted	nIVs
	Exposure
	Air pollution
	particulate matter air pollution (PM2.5)	The UK Biobank study	423,796 European participants	http://www.nealelab.is/uk-biobank	SD（micro-g/m3 ）	age, age-squared, sex, age*sex and age-squared*sex,20 principal components (up from 10).	56
	particulate matter air pollution (PM10)	The UK Biobank study	455,314 European participants	http://www.nealelab.is/uk-biobank	SD（micro-g/m3 ）	age, age-squared, sex, age*sex and age-squared*sex,20 principal components (up from 10).	240
	nitrogen dioxide（NO2）	The UK Biobank study	456,380 European participants	http://www.nealelab.is/uk-biobank	SD（micro-g/m3 ）	age, age-squared, sex, age*sex and age-squared*sex,20 principal components (up from 10).	103
	nitrogen oxides（NOx）	The UK Biobank study	456,380 European participants	http://www.nealelab.is/uk-biobank	SD（micro-g/m3 ）	age, age-squared, sex, age*sex and age-squared*sex,20 principal components (up from 10).	72
	Lifestyle factor
	Moderate-to-vigorous intensity physical activity during leisure time（MVPA）	Zhe W	608,595 European participants	36071172	MVPA activer vs inactiver	age, age-squared, principal components reflecting population structure and additional study-specific covariates.	314
	Leisure screen time	Zhe W	526,725 European participants	36071172	SD(in hour of leisure screen per day)	age, age-squared, principal components reflecting population structure and additional study-specific covariates.	129
	Sedentary commuting	Zhe W	159,606 European participants	36071172	yes vs. no(Individuals who reported sedentary commuting )	age, age-squared, principal components reflecting population structure and additional study-specific covariates.	15
	Smoking initiation	GWAS and Sequencing Consortium of Alcohol and Nicotine use (GSCAN)	311,629 European-ancestry cases and 321,173 European-ancestry controls	30643251	Ever smoked regularly vs never	age, age-squared, sex, and genetic principal components.	226
	Alcoholic drinks per week	GWAS and Sequencing Consortium of Alcohol and Nicotine use (GSCAN)	335,394 European participants	30643251	SD (9 drinks/week)	age, age-squared, sex, and genetic principal components.	120
	Coffee intake	The UK Biobank study	428,860 European participants	http://www.nealelab.is/uk-biobank	SD（A cup of coffee intake per day）	age, age-squared, sex, age*sex and age2*sex,20 principal components (up from 10).	120
	Relative carbohydrate intake	Meddens S	268,922 European participants	32393786	SD	age, sex, and up to 20 genetic principal components.	41
	Relative fat intake	Meddens S	268,922 European participants	32393786	SD	age, sex, and up to 20 genetic principal components.	34
	Relative protein intake	Meddens S	268,922 European participants	32393786	SD	age, sex, and up to 20 genetic principal components.	38
	Relative sugar intake	Meddens S	235,391 European participants	32393786	SD	age, sex, and up to 20 genetic principal components.	39
	Mediator
	C-reactive protein	the UK Biobank and the Cohorts for Heart and Aging Research in Genomic Epidemiology (CHARGE) consortium	575,531 European participants	35459240	SD（mg/l）	age, sex, UKB array (UKB vs UK BiLEVE to account for the different genotyping chips44) and 40 genetic principal components.	-
	41 Inflammatory cytokines	Ahola-Olli AV		27989323	SD	age, sex, body-mass index, and the first ten genetic principal components.	-
	confounder
	Body mass index	Genetic Investigation of Anthropometric Traits (GIANT) Consortium	681,275 European participants	30124842	SD (4.7 kg/m2)	age, sex, recruitment centre, genotyping batches and 10 PCs calculated from 132 102 out of the 147 604 genotyped SNPs.	-
	Low density lipoprotein cholesterol levels	Klimentidis YC	431,167 European participants	32493714	SD	age, sex,“last eating” time (excluding individuals reporting extreme values, >16 h) and center.	-
	Outcome
	Primary analysis
	Metabolic syndrome	Complex Trait Genetics Lab (CTG)	461,902 European participants	35983957	yes vs. no	EraSOR for FG, HDL-C, and TG because of sample overlap with FHS.	-
	Waist circumference	Genetic Investigation of Anthropometric Traits (GIANT) Consortium	232,101 European participants	25673412	SD (cm)	age age-squared,study-specific covariates if necessary, and BMI.	-
	Fasting glucose	Meta-Analyses of Glucose and Insulin-related Traits Consortium (MAGIC)	200,622 European participants	34059833	SD(mmol/l)	age, age-squared , sex, studysite, BMI	-
	Hypertension	The Finngen study	116,714 European-ancestry cases and 316,345 European-ancestry controls	https://www.finngen.fi/fi	yes vs. no	sex, birth year, genotyping batch, and the first 10 genetic principal components.	-
	HDL cholesterol	Global Lipids Genetics Consortium (GLGC)	187,167 Mixed participants (96%European participants)	24097068	SD (mg/dL)	age, age-squared and sex.	-
	Triglycerides	Global Lipids Genetics Consortium (GLGC)	177,861 Mixed participants (96%European participants)	24097068	SD (mg/dL)	age, age-squared and sex.	-
	Replication analysis
	Metabolic syndrome	The UK Biobank study	291,107 European participants	http://www.nealelab.is/uk-biobank	yes vs. no	age, age-squared, sex, age*sex and age2*sex,20 principal components (up from 10).	-
	Waist circumference	The UK Biobank study	462,166 European participants	http://www.nealelab.is/uk-biobank	SD	age, age-squared, sex, age*sex and age2*sex,20 principal components (up from 10).	-
	Fasting glucose	Manning AK	58,074 European participants	22581228	SD(mmol/l)	age, sex and study-level covariates at a minimum.	-
	Hypertension	The UK Biobank study	119,731 European-ancestry cases and 343,202 European-ancestry controls	http://www.nealelab.is/uk-biobank	SD	age, age-squared, sex, age*sex and age2*sex,20 principal components (up from 10).	-
	HDL cholesterol	The UK Biobank study	403,943 European participants	http://www.nealelab.is/uk-biobank	SD	age, age-squared, sex, age*sex and age2*sex,20 principal components (up from 10).	-
	Triglycerides	The UK Biobank study	441,016 European participants	http://www.nealelab.is/uk-biobank	SD	age, age-squared, sex, age*sex and age2*sex,20 principal components (up from 10).	-

## Sheet: Table S2
	Table S2. Single nucleotide polymorphisms (SNPs) associated with air pollutants.
	Exposure	SNP	EA	NEA	EAF	Beta	SE	P value	R2	F statisitc
	PM2.5	rs12133063	A	C	0.347049	0.0104397	0.00226473	4e-06	5.01377e-05	21.2491
	PM2.5	rs487230	G	A	0.759827	-0.0116357	0.00251245	3.6e-06	5.06071e-05	21.4481
	PM2.5	rs7514956	C	A	0.186948	-0.0129805	0.00276012	2.6e-06	5.21852e-05	22.1169
	PM2.5	rs7573056	C	A	0.441655	-0.0114094	0.00217008	1.5e-07	6.52212e-05	27.6422
	PM2.5	rs6749467	A	G	0.465814	-0.0123919	0.00218282	1.4e-08	7.60414e-05	32.2283
	PM2.5	rs6432776	C	T	0.71603	0.0114362	0.00238615	1.6e-06	5.41985e-05	22.9703
	PM2.5	rs13429081	T	A	0.185096	0.0136465	0.00277736	8.9e-07	5.69635e-05	24.1422
	PM2.5	rs62180462	A	G	0.021377	-0.0351148	0.00762753	4.2e-06	5.00074e-05	21.1939
	PM2.5	rs13035717	T	A	0.172585	-0.0130553	0.00284989	4.6e-06	4.95153e-05	20.9853
	PM2.5	rs4854523	G	A	0.171589	0.0134447	0.0028931	3.4e-06	5.09561e-05	21.596
	PM2.5	rs6547952	G	T	0.645782	-0.0110872	0.00228323	1.2e-06	5.5637e-05	23.5799
	PM2.5	rs987204	A	G	0.437758	0.0102987	0.00216741	2e-06	5.32725e-05	22.5777
	PM2.5	rs80123875	T	G	0.092425	-0.0187398	0.00386726	1.3e-06	5.54041e-05	23.4812
	PM2.5	rs1318845	C	T	0.201776	-0.0139685	0.0026994	2.3e-07	6.31802e-05	26.7771
	PM2.5	rs72808024	C	A	0.149235	-0.0160909	0.00302016	9.9e-08	6.69753e-05	28.3856
	PM2.5	rs58824859	C	A	0.364496	0.0120084	0.00230502	1.9e-07	6.40378e-05	27.1406
	PM2.5	rs1372504	A	G	0.374311	0.0122914	0.00221931	3.1e-08	7.23733e-05	30.6736
	PM2.5	rs62368672	C	T	0.082788	-0.0181174	0.00392946	4e-06	5.01588e-05	21.2581
	PM2.5	rs27152	T	C	0.665119	-0.0107288	0.00230502	3.2e-06	5.1118e-05	21.6646
	PM2.5	rs56068671	T	G	0.083179	-0.0181851	0.00392582	3.6e-06	5.06281e-05	21.457
	PM2.5	rs12203592	T	C	0.212894	0.0216661	0.00259111	6.2e-17	0.000164953	69.9178
	PM2.5	rs77255816	T	C	0.036507	0.0313937	0.00572778	4.2e-08	7.08802e-05	30.0407
	PM2.5	rs9260734	A	G	0.151287	0.0139827	0.0029999	3.1e-06	5.12613e-05	21.7253
	PM2.5	rs7776279	A	G	0.71427	0.0109471	0.00238522	4.4e-06	4.97007e-05	21.0639
	PM2.5	rs114708313	T	A	0.06585	0.024558	0.00447797	4.2e-08	7.09637e-05	30.0761
	PM2.5	rs17657881	C	T	0.018141	-0.0371072	0.00804635	4e-06	5.01811e-05	21.2675
	PM2.5	rs1182891	T	G	0.187616	0.0127384	0.0027732	4.4e-06	4.97839e-05	21.0992
	PM2.5	rs6960011	G	A	0.339919	-0.0105236	0.00227496	3.7e-06	5.04896e-05	21.3983
	PM2.5	rs2141531	G	T	0.298539	-0.0114166	0.00235647	1.3e-06	5.5382e-05	23.4719
	PM2.5	rs62484669	A	G	0.097718	0.0178158	0.00362056	8.6e-07	5.71317e-05	24.2135
	PM2.5	rs17070492	G	C	0.099531	0.0168879	0.00361675	3e-06	5.1444e-05	21.8028
	PM2.5	rs116925111	G	T	0.010465	0.0533208	0.0108609	9.1e-07	5.68696e-05	24.1024
	PM2.5	rs77205736	T	C	0.273909	0.0135219	0.00241312	2.1e-08	7.40847e-05	31.399
	PM2.5	rs9644485	C	T	0.478622	0.00986771	0.00215925	4.9e-06	4.92775e-05	20.8845
	PM2.5	rs78230389	G	A	0.013105	-0.0467891	0.00948467	8.1e-07	5.742e-05	24.3356
	PM2.5	rs10961167	A	G	0.085011	-0.0193433	0.00406633	2e-06	5.3392e-05	22.6284
	PM2.5	rs1537371	A	C	0.500143	0.0123705	0.00214859	8.5e-09	7.82126e-05	33.1486
	PM2.5	rs78546077	C	T	0.026758	-0.0317179	0.00692319	4.6e-06	4.95243e-05	20.9891
	PM2.5	rs35703574	A	G	0.049304	-0.0246758	0.00534513	3.9e-06	5.0286e-05	21.312
	PM2.5	rs11042316	A	G	0.257614	-0.0130416	0.00249815	1.8e-07	6.43043e-05	27.2535
	PM2.5	rs11610713	T	A	0.018654	0.0379698	0.00806561	2.5e-06	5.22905e-05	22.1616
	PM2.5	rs12812511	G	A	0.287274	0.0111409	0.00239094	3.2e-06	5.123e-05	21.7121
	PM2.5	rs78539764	C	T	0.027757	-0.0335181	0.0065901	3.7e-07	6.10368e-05	25.8686
	PM2.5	rs72655898	G	A	0.286053	-0.0113177	0.00239801	2.4e-06	5.25575e-05	22.2747
	PM2.5	rs78467598	G	C	0.023215	-0.0380022	0.00768566	7.6e-07	5.76864e-05	24.4485
	PM2.5	rs17103928	A	C	0.151277	-0.0139275	0.00300906	3.7e-06	5.05482e-05	21.4231
	PM2.5	rs718059	A	G	0.166699	-0.0135133	0.00294347	4.4e-06	4.97308e-05	21.0766
	PM2.5	rs72700006	C	T	0.074366	0.02003	0.00424579	2.4e-06	5.25128e-05	22.2558
	PM2.5	rs11855821	A	G	0.283075	-0.0126249	0.00243151	2.1e-07	6.36091e-05	26.9589
	PM2.5	rs16957755	C	T	0.064265	0.0216856	0.00438434	7.6e-07	5.77235e-05	24.4643
	PM2.5	rs2292156	T	G	0.167529	0.0146809	0.0028777	3.4e-07	6.14088e-05	26.0263
	PM2.5	rs17183854	G	T	0.013488	-0.0434289	0.00942022	4e-06	5.01484e-05	21.2536
	PM2.5	rs72642437	T	C	0.003862	0.113396	0.019135	3.1e-09	8.28601e-05	35.1185
	PM2.5	rs62119705	T	C	0.657728	0.0111347	0.00226543	8.9e-07	5.69999e-05	24.1576
	PM2.5	rs6134106	A	C	0.008242	0.0544302	0.011897	4.8e-06	4.93886e-05	20.9316
	PM2.5	rs117878224	G	A	0.011699	-0.0480395	0.0100662	1.8e-06	5.37385e-05	22.7753
	PM10	rs12748963	T	C	0.168038	-0.0141003	0.00283168	6.4e-07	5.44545e-05	24.7951
	PM10	rs111897525	A	C	0.048188	-0.0234809	0.0046205	3.7e-07	5.67173e-05	25.8256
	PM10	rs7553571	G	A	0.453425	0.00994318	0.00198543	5.5e-07	5.50816e-05	25.0807
	PM10	rs17017032	A	G	0.00941	0.0467602	0.0101795	4.4e-06	4.63414e-05	21.1008
	PM10	rs188948098	T	A	0.058245	-0.0200956	0.00424799	2.2e-06	4.91476e-05	22.3786
	PM10	rs4633248	T	C	0.292535	0.0113426	0.00218329	2e-07	5.92742e-05	26.9899
	PM10	rs2985708	G	C	0.951144	-0.0234499	0.00456378	2.8e-07	5.79824e-05	26.4016
	PM10	rs75945249	C	T	0.01541	-0.0385194	0.00795972	1.3e-06	5.14316e-05	23.4186
	PM10	rs116240980	G	C	0.017451	-0.0350636	0.00755678	3.5e-06	4.72833e-05	21.5297
	PM10	rs10889408	A	G	0.504893	0.00915534	0.001969	3.3e-06	4.74817e-05	21.62
	PM10	rs17377309	T	C	0.100262	-0.0160721	0.00332917	1.4e-06	5.11847e-05	23.3062
	PM10	rs77199539	T	C	0.034214	-0.0247229	0.00540417	4.8e-06	4.59632e-05	20.9285
	PM10	rs138604729	A	G	0.041397	-0.0248591	0.00499041	6.3e-07	5.44959e-05	24.814
	PM10	rs142549682	A	G	0.013873	0.0400438	0.00858413	3.1e-06	4.7791e-05	21.7609
	PM10	rs10874235	T	C	0.6909	-0.0097259	0.00212216	4.6e-06	4.61288e-05	21.004
	PM10	rs11120971	C	A	0.707336	-0.0105223	0.00215598	1.1e-06	5.23116e-05	23.8194
	PM10	rs79141939	A	G	0.10022	-0.0166046	0.00334878	7.1e-07	5.39945e-05	24.5856
	PM10	rs3770007	C	T	0.121605	0.0163556	0.003003	5.1e-08	6.51453e-05	29.6634
	PM10	rs11682045	A	G	0.612607	-0.0101794	0.0020234	4.9e-07	5.55835e-05	25.3092
	PM10	rs17268792	A	G	0.107369	0.0151815	0.00318306	1.8e-06	4.99582e-05	22.7477
	PM10	rs13389224	T	C	0.439694	-0.0106427	0.00199321	9.3e-08	6.26123e-05	28.5099
	PM10	rs4673633	A	G	0.156468	-0.0130482	0.00273531	1.8e-06	4.99753e-05	22.7555
	PM10	rs45566035	A	C	0.014789	0.0382952	0.00826618	3.6e-06	4.71354e-05	21.4623
	PM10	rs4334436	A	G	0.310666	-0.0108512	0.00212284	3.2e-07	5.73832e-05	26.1288
	PM10	rs74315563	T	C	0.013745	-0.0390064	0.00850709	4.5e-06	4.6172e-05	21.0236
	PM10	rs13425414	C	G	0.174224	0.0136442	0.00258952	1.4e-07	6.09706e-05	27.7623
	PM10	rs142871762	A	G	0.024893	0.0308295	0.00631298	1e-06	5.23758e-05	23.8486
	PM10	rs114789974	A	C	0.010467	-0.0552064	0.00963471	1e-08	7.2104e-05	32.8322
	PM10	rs115319635	C	T	0.089446	0.0161427	0.00349527	3.9e-06	4.68446e-05	21.3299
	PM10	rs11674520	G	A	0.589388	0.0097212	0.00199755	1.1e-06	5.20129e-05	23.6833
	PM10	rs4671885	C	G	0.264949	-0.0119379	0.00222427	8e-08	6.32619e-05	28.8057
	PM10	rs112965629	C	T	0.026365	-0.0298994	0.00613521	1.1e-06	5.21594e-05	23.75
	PM10	rs11901904	T	C	0.897206	-0.0156206	0.00324231	1.5e-06	5.09745e-05	23.2105
	PM10	rs182549	T	C	0.738828	-0.0124233	0.00221854	2.1e-08	6.8865e-05	31.3572
	PM10	rs112307532	T	G	0.037949	-0.0249965	0.00513664	1.1e-06	5.20076e-05	23.6809
	PM10	rs2007020	A	G	0.431236	0.00966901	0.00199013	1.2e-06	5.18403e-05	23.6047
	PM10	rs76881430	G	T	0.03653	-0.0249692	0.00523641	1.9e-06	4.99355e-05	22.7374
	PM10	rs13084230	T	C	0.200319	-0.013562	0.00245992	3.5e-08	6.67522e-05	30.3951
	PM10	rs10804931	T	G	0.622536	-0.0101148	0.00203648	6.8e-07	5.41776e-05	24.669
	PM10	rs6793835	A	G	0.263796	-0.0129858	0.00223823	6.6e-09	7.39239e-05	33.6609
	PM10	rs112927006	A	G	0.081099	-0.0177083	0.00363197	1.1e-06	5.22078e-05	23.7721
	PM10	rs12485492	C	G	0.923039	-0.017041	0.00368874	3.8e-06	4.68708e-05	21.3419
	PM10	rs78783963	A	T	0.031107	-0.0268423	0.00584117	4.3e-06	4.63776e-05	21.1173
	PM10	rs116374079	T	C	0.015112	0.0463014	0.00867039	9.3e-08	6.26286e-05	28.5173
	PM10	rs744802	G	A	0.097756	0.0176051	0.00331797	1.1e-07	6.18293e-05	28.1534
	PM10	rs112596499	G	A	0.265142	-0.0109065	0.00223273	1e-06	5.2404e-05	23.8614
	PM10	rs7628420	A	C	0.013287	-0.0518269	0.0103511	5.5e-07	5.50557e-05	25.0689
	PM10	rs7645358	G	A	0.117755	0.0151663	0.00309641	9.7e-07	5.26876e-05	23.9906
	PM10	rs343311	A	G	0.585572	-0.0102029	0.00199022	3e-07	5.77177e-05	26.2811
	PM10	rs35435530	T	G	0.085726	0.0180996	0.0036953	9.7e-07	5.26871e-05	23.9904
	PM10	rs35024573	C	T	0.067684	-0.0218979	0.0044229	7.4e-07	5.3834e-05	24.5126
	PM10	rs114856531	T	C	0.013696	-0.0396894	0.00851676	3.2e-06	4.76945e-05	21.7169
	PM10	rs57548641	G	A	0.028458	-0.027527	0.00595753	3.8e-06	4.68872e-05	21.3493
	PM10	rs115302993	C	T	0.030554	-0.0276131	0.00571133	1.3e-06	5.13361e-05	23.3751
	PM10	rs12503405	A	G	0.074296	0.01813	0.00375013	1.3e-06	5.13298e-05	23.3723
	PM10	rs4833095	C	T	0.206945	0.0251105	0.00240554	1.7e-25	0.00023926	108.964
	PM10	rs77056472	G	A	0.045538	0.0234852	0.00478063	9e-07	5.3001e-05	24.1333
	PM10	rs6447363	A	G	0.701765	0.0103074	0.00214733	1.6e-06	5.0602e-05	23.0409
	PM10	rs62299683	G	A	0.152876	-0.0141059	0.00281059	5.2e-07	5.53187e-05	25.1886
	PM10	rs34574483	C	T	0.040266	-0.024236	0.00499523	1.2e-06	5.16984e-05	23.5401
	PM10	rs4692550	G	A	0.653241	0.0100033	0.0020687	1.3e-06	5.13521e-05	23.3824
	PM10	rs978504	C	T	0.035559	-0.0246429	0.00537305	4.5e-06	4.61967e-05	21.0349
	PM10	rs13122455	T	C	0.199995	-0.0140039	0.0024643	1.3e-08	7.09201e-05	32.293
	PM10	rs6852114	A	T	0.178807	-0.0120012	0.00256713	2.9e-06	4.79978e-05	21.855
	PM10	rs7663699	G	C	0.556486	0.0102267	0.001978	2.3e-07	5.87059e-05	26.7311
	PM10	rs7440783	T	C	0.459145	-0.00912108	0.00197589	3.9e-06	4.67989e-05	21.3091
	PM10	rs11747926	G	A	0.839339	-0.0126443	0.00267814	2.3e-06	4.89543e-05	22.2906
	PM10	rs17706942	C	T	0.04576	0.0219686	0.00472865	3.4e-06	4.74022e-05	21.5838
	PM10	rs2731804	C	T	0.240542	-0.011006	0.002297	1.7e-06	5.04201e-05	22.9581
	PM10	rs115057100	G	A	0.0211	0.0314265	0.00684709	4.4e-06	4.62646e-05	21.0658
	PM10	rs6880443	A	G	0.007282	0.0573364	0.0117827	1.1e-06	5.20041e-05	23.6793
	PM10	rs6879874	T	A	0.723694	0.0106981	0.00219785	1.1e-06	5.20336e-05	23.6927
	PM10	rs80302245	C	G	0.04776	0.0221591	0.00460586	1.5e-06	5.08335e-05	23.1463
	PM10	rs148167193	C	G	0.02678	-0.0309685	0.006467	1.7e-06	5.03619e-05	22.9315
	PM10	rs79056516	G	A	0.026989	-0.0313185	0.00631519	7.1e-07	5.40125e-05	24.5939
	PM10	rs186595360	C	T	0.014416	-0.0467103	0.00881205	1.2e-07	6.17069e-05	28.0976
	PM10	rs142169179	A	G	0.020279	0.040185	0.0073403	4.4e-08	6.58204e-05	29.9708
	PM10	rs1919243	C	T	0.487612	0.0100872	0.00199137	4.1e-07	5.6351e-05	25.6587
	PM10	rs74444373	A	G	0.076705	0.0201555	0.0037202	6e-08	6.44638e-05	29.353
	PM10	rs17132724	A	G	0.00843	-0.0572544	0.0108102	1.2e-07	6.16045e-05	28.051
	PM10	rs143699179	T	C	0.007117	0.0554373	0.0121274	4.8e-06	4.58921e-05	20.8962
	PM10	rs7380478	T	C	0.455583	0.00948552	0.00196893	1.5e-06	5.09716e-05	23.2092
	PM10	rs185248	G	A	0.121265	0.014592	0.00301175	1.3e-06	5.15535e-05	23.4742
	PM10	rs55692328	A	G	0.121915	-0.0152753	0.00301121	3.9e-07	5.65148e-05	25.7333
	PM10	rs62370429	C	T	0.05775	-0.0261606	0.0043481	1.8e-09	7.9497e-05	36.1988
	PM10	rs72777076	G	A	0.10102	-0.0160314	0.00329608	1.2e-06	5.19534e-05	23.6562
	PM10	rs142861463	A	C	0.012455	0.0431	0.00891038	1.3e-06	5.13841e-05	23.397
	PM10	rs75741864	A	T	0.009908	-0.0495123	0.0105554	2.7e-06	4.8322e-05	22.0026
	PM10	rs915895	C	T	0.362439	-0.0105367	0.00204443	2.6e-07	5.83349e-05	26.5621
	PM10	rs117904745	C	T	0.025736	-0.0305176	0.0062033	8.7e-07	5.31522e-05	24.2021
	PM10	rs58157605	A	G	0.020001	0.032989	0.00708053	3.2e-06	4.76733e-05	21.7073
	PM10	rs2248162	C	T	0.63988	0.0118186	0.00204712	7.8e-09	7.31986e-05	33.3306
	PM10	rs1737333	C	T	0.72763	0.0109043	0.00220916	8e-07	5.35066e-05	24.3635
	PM10	rs6925689	C	T	0.506686	0.0106076	0.00196861	7.1e-08	6.37641e-05	29.0344
	PM10	rs111419645	C	A	0.035925	0.024296	0.00527832	4.2e-06	4.65315e-05	21.1873
	PM10	rs440354	A	G	0.215406	0.011146	0.00240208	3.5e-06	4.72859e-05	21.5309
	PM10	rs17429762	G	A	0.048482	0.0233276	0.004598	3.9e-07	5.65284e-05	25.7395
	PM10	rs202241631	A	G	0.133307	0.0201958	0.00394805	3.1e-07	5.74673e-05	26.1671
	PM10	rs141052416	A	C	0.011655	-0.0455648	0.00933789	1.1e-06	5.22911e-05	23.81
	PM10	rs1789990	T	G	0.500965	0.0100578	0.00198094	3.8e-07	5.66145e-05	25.7787
	PM10	rs6954290	T	G	0.324277	0.01011	0.00210494	1.6e-06	5.06629e-05	23.0686
	PM10	rs144317094	A	C	0.016456	-0.0415544	0.00825089	4.7e-07	5.57054e-05	25.3647
	PM10	rs9640029	T	C	0.478233	-0.0138024	0.00197383	2.7e-12	0.000107382	48.8976
	PM10	rs9655078	T	G	0.465697	0.00932548	0.00197495	2.3e-06	4.89664e-05	22.2961
	PM10	rs140295641	A	T	0.027357	-0.0351352	0.00617205	1.3e-08	7.11679e-05	32.4059
	PM10	rs7457559	T	G	0.319757	-0.010031	0.00211934	2.2e-06	4.91988e-05	22.4019
	PM10	rs113577116	A	G	0.005587	-0.0650866	0.0142493	4.9e-06	4.58211e-05	20.8638
	PM10	rs118156805	G	C	0.030017	-0.0326485	0.00604385	6.6e-08	6.40856e-05	29.1808
	PM10	rs141783874	T	G	0.005901	0.0642318	0.013636	2.5e-06	4.87297e-05	22.1883
	PM10	rs80055518	C	A	0.017792	0.0356981	0.00752627	2.1e-06	4.94081e-05	22.4972
	PM10	rs1376695	G	A	0.685109	-0.0102202	0.00211933	1.4e-06	5.10727e-05	23.2552
	PM10	rs10088658	G	A	0.335102	-0.0101181	0.00208715	1.2e-06	5.16128e-05	23.5011
	PM10	rs10104149	G	A	0.025657	0.0308199	0.00623948	7.8e-07	5.35835e-05	24.3985
	PM10	rs61620752	G	T	0.148343	0.0160687	0.00276719	6.4e-09	7.40526e-05	33.7195
	PM10	rs77743185	G	T	0.009486	0.0525369	0.0104385	4.8e-07	5.56311e-05	25.3309
	PM10	rs117323841	T	C	0.042084	-0.0254001	0.00504148	4.7e-07	5.57467e-05	25.3836
	PM10	rs2004679	C	T	0.307685	0.0119145	0.00213821	2.5e-08	6.81884e-05	31.0491
	PM10	rs11780981	C	T	0.238812	-0.0107123	0.00230826	3.5e-06	4.73004e-05	21.5374
	PM10	rs9792187	T	C	0.129179	0.0153661	0.00294228	1.8e-07	5.98994e-05	27.2745
	PM10	rs74892223	G	A	0.017207	0.0383558	0.00755822	3.9e-07	5.65571e-05	25.7526
	PM10	rs62521107	T	C	0.020286	-0.034425	0.00714805	1.5e-06	5.09377e-05	23.1937
	PM10	rs17756061	A	G	0.11139	0.016589	0.0031484	1.4e-07	6.0971e-05	27.7625
	PM10	rs7825598	G	A	0.89277	0.0161792	0.00318957	3.9e-07	5.65086e-05	25.7305
	PM10	rs1835844	T	C	0.223074	-0.0108976	0.00237093	4.3e-06	4.63973e-05	21.1262
	PM10	rs6557711	A	G	0.666731	0.00962138	0.00209011	4.2e-06	4.65377e-05	21.1902
	PM10	rs9410480	G	C	0.244233	-0.0120357	0.00228714	1.4e-07	6.08163e-05	27.6921
	PM10	rs1475628	T	C	0.253337	-0.011268	0.00226035	6.2e-07	5.45767e-05	24.8508
	PM10	rs10983735	A	G	0.154465	0.0124794	0.00272428	4.6e-06	4.60843e-05	20.9837
	PM10	rs75614542	C	A	0.037884	-0.0252944	0.00514655	8.9e-07	5.30496e-05	24.1554
	PM10	rs75076110	G	C	0.052404	-0.0213671	0.00452456	2.3e-06	4.89786e-05	22.3016
	PM10	rs77454912	T	C	0.059128	0.0193895	0.00420818	4.1e-06	4.66244e-05	21.2296
	PM10	rs7039140	C	T	0.655555	0.00964023	0.0020737	3.3e-06	4.74626e-05	21.6113
	PM10	rs12003333	T	C	0.030036	0.0271515	0.00581954	3.1e-06	4.78056e-05	21.7675
	PM10	rs61875074	C	A	0.073029	0.0222662	0.00384125	6.8e-09	7.37911e-05	33.6005
	PM10	rs10906340	T	C	0.11391	-0.0150705	0.00310644	1.2e-06	5.16887e-05	23.5357
	PM10	rs10823487	T	G	0.430056	0.00961885	0.00199374	1.4e-06	5.11183e-05	23.2759
	PM10	rs72813491	G	T	0.063384	-0.0191525	0.00407669	2.6e-06	4.84734e-05	22.0716
	PM10	rs77863898	T	C	0.072798	-0.0204078	0.00407865	5.6e-07	5.49825e-05	25.0356
	PM10	rs1707285	G	C	0.535453	-0.00904256	0.00197171	4.5e-06	4.61919e-05	21.0327
	PM10	rs12414777	T	C	0.177732	0.0129373	0.00256795	4.7e-07	5.57415e-05	25.3812
	PM10	rs141645281	T	C	0.011564	-0.048052	0.00946317	3.8e-07	5.66258e-05	25.7838
	PM10	rs1172955	A	T	0.70998	0.0106808	0.00216474	8.1e-07	5.34641e-05	24.3441
	PM10	rs11027689	A	G	0.345315	-0.00959399	0.00206952	3.6e-06	4.71985e-05	21.491
	PM10	rs12789494	T	G	0.195141	0.0115565	0.00249025	3.5e-06	4.72972e-05	21.536
	PM10	rs1566736	T	C	0.758843	-0.0113702	0.00229768	7.5e-07	5.37802e-05	24.4881
	PM10	rs7926943	T	C	0.729352	0.0109082	0.00222981	1e-06	5.25577e-05	23.9314
	PM10	rs147895162	C	T	0.015135	-0.0447597	0.00810727	3.4e-08	6.69399e-05	30.4806
	PM10	rs116152878	A	G	0.02959	-0.0266125	0.00580983	4.6e-06	4.60801e-05	20.9818
	PM10	rs2585823	A	G	0.68022	0.0103223	0.00210845	9.8e-07	5.26372e-05	23.9676
	PM10	rs7130576	T	G	0.65803	0.00965968	0.00208035	3.4e-06	4.73501e-05	21.5601
	PM10	rs7934982	C	G	0.401048	0.00999373	0.0020065	6.3e-07	5.44806e-05	24.807
	PM10	rs61882742	C	A	0.305778	-0.0106526	0.00213672	6.2e-07	5.4586e-05	24.855
	PM10	rs78267018	C	T	0.017692	-0.0343202	0.00745656	4.2e-06	4.65255e-05	21.1846
	PM10	rs76557708	C	T	0.096786	-0.0157459	0.00343172	4.5e-06	4.6236e-05	21.0528
	PM10	rs7134253	T	C	0.250118	-0.0112634	0.00227409	7.3e-07	5.38753e-05	24.5314
	PM10	rs4760076	G	T	0.266959	-0.0106171	0.0022372	2.1e-06	4.94618e-05	22.5217
	PM10	rs12832318	A	G	0.146886	0.014052	0.00277521	4.1e-07	5.63053e-05	25.6379
	PM10	rs77932605	T	A	0.041921	0.0239506	0.00493579	1.2e-06	5.17114e-05	23.546
	PM10	rs74407126	G	C	0.06845	0.0198013	0.00403116	9e-07	5.29899e-05	24.1282
	PM10	rs12821416	T	C	0.135942	0.0145212	0.00286772	4.1e-07	5.63114e-05	25.6407
	PM10	rs7313274	A	C	0.358269	-0.00983519	0.00205089	1.6e-06	5.05066e-05	22.9974
	PM10	rs80184318	A	G	0.01799	0.0407096	0.00863699	2.4e-06	4.87907e-05	22.2161
	PM10	rs148085105	C	G	0.020064	0.0332558	0.00716349	3.4e-06	4.73319e-05	21.5518
	PM10	rs118081621	C	A	0.040131	-0.025442	0.00500344	3.7e-07	5.67845e-05	25.8561
	PM10	rs9529552	G	A	0.049432	-0.0248912	0.00458235	5.6e-08	6.48001e-05	29.5062
	PM10	rs2298236	C	T	0.093602	0.0164524	0.00339008	1.2e-06	5.17256e-05	23.5525
	PM10	rs9510651	C	T	0.048778	-0.0215605	0.00464737	3.5e-06	4.72685e-05	21.5229
	PM10	rs12876420	A	G	0.108643	0.0163085	0.0033307	9.8e-07	5.2653e-05	23.9748
	PM10	rs113860796	C	G	0.034895	0.0256327	0.00546823	2.8e-06	4.82573e-05	21.9732
	PM10	rs7148769	T	C	0.216337	-0.012845	0.00239447	8.1e-08	6.31991e-05	28.7771
	PM10	rs17103245	G	A	0.339415	0.0102656	0.00208601	8.6e-07	5.31865e-05	24.2178
	PM10	rs2230098	G	A	0.059613	-0.0210297	0.00429752	9.9e-07	5.25892e-05	23.9457
	PM10	rs78794032	T	C	0.005823	-0.0647383	0.0133709	1.3e-06	5.14835e-05	23.4423
	PM10	rs10498638	C	T	0.188322	0.0140135	0.00253691	3.3e-08	6.70105e-05	30.5127
	PM10	rs2516973	C	T	0.707948	0.0118931	0.00253118	2.6e-06	4.84855e-05	22.0771
	PM10	rs1381273	T	C	0.448502	0.00923657	0.001983	3.2e-06	4.7648e-05	21.6957
	PM10	rs113904579	A	G	0.042057	0.0238576	0.00501087	1.9e-06	4.97846e-05	22.6686
	PM10	rs74247887	T	C	0.028721	0.037132	0.00588066	2.7e-10	8.75579e-05	39.8697
	PM10	rs79431487	G	T	0.019057	-0.0339552	0.00729875	3.3e-06	4.75318e-05	21.6428
	PM10	rs74805019	C	G	0.033712	-0.0307133	0.00548224	2.1e-08	6.8928e-05	31.3859
	PM10	rs62024305	A	T	0.019139	-0.0364871	0.00731178	6e-07	5.46887e-05	24.9018
	PM10	rs77857236	C	A	0.04671	0.0217473	0.00466192	3.1e-06	4.77913e-05	21.761
	PM10	rs12916542	C	G	0.077831	-0.0174544	0.00372655	2.8e-06	4.81797e-05	21.9378
	PM10	rs35731545	T	C	0.018158	-0.0368108	0.00755775	1.1e-06	5.20993e-05	23.7227
	PM10	rs4965742	G	A	0.941872	0.0227984	0.00427718	9.8e-08	6.23958e-05	28.4113
	PM10	rs57094102	A	G	0.044986	0.0236697	0.00474468	6.1e-07	5.46559e-05	24.8868
	PM10	rs2619695	G	C	0.778798	0.0110312	0.00237288	3.3e-06	4.74638e-05	21.6119
	PM10	rs140767537	A	C	0.061516	0.0205368	0.00427123	1.5e-06	5.07723e-05	23.1184
	PM10	rs12438655	G	A	0.127057	-0.0155179	0.00297004	1.7e-07	5.99521e-05	27.2985
	PM10	rs11644580	C	T	0.16725	-0.0148097	0.00287033	2.5e-07	5.84645e-05	26.6212
	PM10	rs79659681	G	A	0.002388	0.112195	0.0209832	8.9e-08	6.27864e-05	28.5892
	PM10	rs57900082	G	A	0.172901	0.01233	0.0026103	2.3e-06	4.90019e-05	22.3123
	PM10	rs7200852	A	C	0.054732	-0.0244283	0.00445039	4e-08	6.61684e-05	30.1293
	PM10	rs111536585	A	C	0.022584	-0.0356011	0.00690396	2.5e-07	5.83975e-05	26.5906
	PM10	rs146833224	C	G	0.019128	0.039064	0.00730113	8.8e-08	6.28688e-05	28.6267
	PM10	rs72795429	T	C	0.029915	-0.0308883	0.005774	8.8e-08	6.28487e-05	28.6176
	PM10	rs4788565	A	G	0.066776	-0.0219191	0.00399449	4.1e-08	6.61276e-05	30.1107
	PM10	rs79515662	A	G	0.01216	0.0459526	0.00896748	3e-07	5.76691e-05	26.259
	PM10	rs72802307	T	A	0.054934	0.0228063	0.00437735	1.9e-07	5.96143e-05	27.1447
	PM10	rs147214297	T	C	0.023593	-0.0350629	0.00670898	1.7e-07	5.99854e-05	27.3137
	PM10	rs117876623	C	T	0.15953	0.0142452	0.00277841	2.9e-07	5.77309e-05	26.2871
	PM10	rs7222234	A	T	0.06492	-0.0214675	0.00399575	7.8e-08	6.3391e-05	28.8645
	PM10	rs138818953	A	G	0.011422	0.0500555	0.00983263	3.6e-07	5.69152e-05	25.9157
	PM10	rs12150353	T	C	0.162511	-0.0122871	0.00267368	4.3e-06	4.63819e-05	21.1192
	PM10	rs1328120	A	G	0.788089	-0.0126339	0.00241723	1.7e-07	5.99932e-05	27.3173
	PM10	rs143648720	T	C	0.031219	-0.0284195	0.00593224	1.7e-06	5.04037e-05	22.9506
	PM10	rs117110432	C	G	0.011204	-0.0514958	0.00964092	9.2e-08	6.26568e-05	28.5302
	PM10	rs149254120	A	G	0.007671	-0.0551962	0.0118282	3.1e-06	4.78244e-05	21.7761
	PM10	rs17658327	C	T	0.01071	0.0450462	0.00965487	3.1e-06	4.7807e-05	21.7682
	PM10	rs72835003	C	T	0.027279	0.0281259	0.00604789	3.3e-06	4.74978e-05	21.6273
	PM10	rs9890345	C	T	0.143046	0.0138617	0.00281363	8.4e-07	5.33046e-05	24.2715
	PM10	rs3809711	A	G	0.052862	0.022485	0.0045619	8.3e-07	5.33532e-05	24.2936
	PM10	rs17728367	T	C	0.251357	0.0108758	0.00226768	1.6e-06	5.05156e-05	23.0015
	PM10	rs11663540	T	G	0.832501	0.0127757	0.00263752	1.3e-06	5.15281e-05	23.4626
	PM10	rs17775100	T	A	0.030624	-0.0268126	0.00583407	4.3e-06	4.63878e-05	21.1219
	PM10	rs56077944	T	C	0.073578	-0.0177183	0.00379428	3e-06	4.7891e-05	21.8064
	PM10	rs12608349	C	T	0.415239	0.00973693	0.00199833	1.1e-06	5.21406e-05	23.7415
	PM10	rs117529040	T	C	0.01277	0.0419003	0.00879517	1.9e-06	4.9844e-05	22.6957
	PM10	rs76646807	T	C	0.036028	-0.0259886	0.00532368	1.1e-06	5.23369e-05	23.8309
	PM10	rs62111201	A	T	0.153313	-0.0136231	0.00273507	6.3e-07	5.44854e-05	24.8092
	PM10	rs3760987	T	C	0.213122	-0.0121799	0.00241789	4.7e-07	5.57287e-05	25.3754
	PM10	rs60304336	T	G	0.040906	0.0279318	0.00502954	2.8e-08	6.77331e-05	30.8418
	PM10	rs7249925	G	A	0.229611	0.0117277	0.0023372	5.2e-07	5.52967e-05	25.1786
	PM10	rs11673189	A	G	0.259262	-0.0108811	0.0022451	1.3e-06	5.15871e-05	23.4894
	PM10	rs62118471	C	T	0.02741	0.0294602	0.00641459	4.4e-06	4.63236e-05	21.0927
	PM10	rs78723881	G	T	0.129381	0.0137969	0.0029745	3.5e-06	4.72502e-05	21.5146
	PM10	rs141520514	G	A	0.02491	-0.0337325	0.00632747	9.8e-08	6.24164e-05	28.4207
	PM10	rs3213261	A	G	0.02603	-0.0292624	0.0063285	3.8e-06	4.69555e-05	21.3804
	PM10	rs76425335	A	G	0.043332	-0.0239639	0.00494195	1.2e-06	5.16398e-05	23.5135
	PM10	rs16981175	A	G	0.090003	-0.0167639	0.00344472	1.1e-06	5.20126e-05	23.6832
	PM10	rs16995919	T	C	0.052757	0.0247851	0.00476635	2e-07	5.93844e-05	27.0401
	PM10	rs6071089	T	C	0.507771	-0.00898692	0.00196656	4.9e-06	4.58645e-05	20.8836
	PM10	rs13040787	A	G	0.028709	-0.0294119	0.00592586	6.9e-07	5.41014e-05	24.6344
	PM10	rs708986	A	C	0.757661	-0.010593	0.00229287	3.8e-06	4.68757e-05	21.3441
	PM10	rs2838518	A	C	0.028949	-0.0279864	0.00587055	1.9e-06	4.99119e-05	22.7266
	PM10	rs229100	C	T	0.842147	-0.0126152	0.00269462	2.8e-06	4.8135e-05	21.9175
	PM10	rs8132764	A	T	0.045569	-0.0235645	0.00491884	1.7e-06	5.04032e-05	22.9503
	PM10	rs149628196	G	A	0.02055	-0.0369888	0.00715665	2.4e-07	5.86657e-05	26.7128
	PM10	rs2213533	A	C	0.341163	0.0105974	0.00208976	4e-07	5.64768e-05	25.716
	PM10	rs5768182	G	A	0.312829	0.00990813	0.00213532	3.5e-06	4.72853e-05	21.5306
	NO2	rs111288222	T	C	0.016208	-0.0384334	0.00824458	3.1e-06	4.76138e-05	21.7309
	NO2	rs10926117	C	G	0.582134	-0.00966505	0.00207399	3.2e-06	4.75825e-05	21.7167
	NO2	rs12125927	A	G	0.080556	-0.0180738	0.00388033	3.2e-06	4.75351e-05	21.695
	NO2	rs112429058	G	A	0.038211	0.026038	0.00529402	8.7e-07	5.30023e-05	24.1904
	NO2	rs533745	A	G	0.387517	0.0101479	0.00207907	1.1e-06	5.21993e-05	23.8239
	NO2	rs6658422	T	C	0.041642	0.0249084	0.00505469	8.3e-07	5.32051e-05	24.2829
	NO2	rs1203682	C	G	0.23116	-0.0117126	0.00239599	1e-06	5.23585e-05	23.8965
	NO2	rs6724825	A	G	0.269765	0.0105731	0.00229019	3.9e-06	4.66998e-05	21.3137
	NO2	rs8106	G	A	0.074308	-0.0187481	0.00385405	1.1e-06	5.18478e-05	23.6634
	NO2	rs62112215	T	G	0.168206	-0.0129528	0.00271814	1.9e-06	4.97549e-05	22.7082
	NO2	rs73151438	A	C	0.090325	0.0217529	0.00465219	2.9e-06	4.7904e-05	21.8634
	NO2	rs11682045	A	G	0.61266	-0.0101093	0.00208467	1.2e-06	5.15251e-05	23.5161
	NO2	rs143998384	G	A	0.014933	0.0411298	0.00878905	2.9e-06	4.79824e-05	21.8992
	NO2	rs72968596	G	C	0.05575	0.0207607	0.00454463	4.9e-06	4.57236e-05	20.8682
	NO2	rs62180536	T	C	0.028932	-0.0321	0.00607843	1.3e-07	6.11046e-05	27.8885
	NO2	rs4671893	G	A	0.276765	-0.0112598	0.00230441	1e-06	5.23109e-05	23.8748
	NO2	rs78991270	A	C	0.04801	-0.0217085	0.00474408	4.7e-06	4.58785e-05	20.9389
	NO2	rs145935842	G	A	0.012409	-0.0448028	0.00922019	1.2e-06	5.17346e-05	23.6118
	NO2	rs114789974	A	C	0.010462	-0.0462593	0.00992846	3.2e-06	4.7565e-05	21.7086
	NO2	rs72839513	A	G	0.062553	0.0208938	0.00418631	6e-07	5.45785e-05	24.9098
	NO2	rs35544454	T	A	0.181817	-0.0129581	0.00263503	8.8e-07	5.29861e-05	24.183
	NO2	rs1441961	C	T	0.430563	-0.00984462	0.00205088	1.6e-06	5.04858e-05	23.0418
	NO2	rs6809736	A	G	0.888907	0.0155278	0.00326518	2e-06	4.95516e-05	22.6154
	NO2	rs73072692	T	C	0.236944	0.0124817	0.00241324	2.3e-07	5.86131e-05	26.7513
	NO2	rs10804931	T	G	0.622587	-0.0103144	0.00209721	8.7e-07	5.29974e-05	24.1881
	NO2	rs7628420	A	C	0.013286	-0.0489933	0.0106598	4.3e-06	4.62838e-05	21.1239
	NO2	rs974801	G	A	0.364613	0.0106991	0.00210202	3.6e-07	5.67636e-05	25.9071
	NO2	rs13122455	T	C	0.20001	-0.0116146	0.00253702	4.7e-06	4.59213e-05	20.9584
	NO2	rs116289821	A	G	0.022548	-0.0337752	0.00686428	8.6e-07	5.30464e-05	24.2105
	NO2	rs6838901	C	G	0.1622	-0.0127004	0.0027566	4.1e-06	4.65094e-05	21.2268
	NO2	rs35675286	A	G	0.028369	0.0297781	0.00643879	3.7e-06	4.68639e-05	21.3887
	NO2	rs79657971	G	A	0.003029	0.0887483	0.0189184	2.7e-06	4.82174e-05	22.0064
	NO2	rs114856531	T	C	0.013697	-0.0417622	0.00876752	1.9e-06	4.97124e-05	22.6888
	NO2	rs1363976	C	T	0.56099	0.00977376	0.00203714	1.6e-06	5.04351e-05	23.0186
	NO2	rs76682037	G	A	0.010694	-0.0494094	0.0098277	5e-07	5.53815e-05	25.2763
	NO2	rs77036000	A	T	0.052205	-0.022258	0.00458242	1.2e-06	5.16932e-05	23.5929
	NO2	rs114026032	A	G	0.025544	-0.0306359	0.0064649	2.1e-06	4.92028e-05	22.4562
	NO2	rs73178577	A	C	0.082709	0.018359	0.00369054	6.5e-07	5.42211e-05	24.7466
	NO2	rs180672921	A	G	0.014276	-0.0409266	0.00887849	4e-06	4.65571e-05	21.2486
	NO2	rs77338596	C	T	0.097137	-0.016042	0.00342575	2.8e-06	4.80461e-05	21.9282
	NO2	rs2517897	A	C	0.152648	0.0144757	0.00281424	2.7e-07	5.79702e-05	26.4579
	NO2	rs75741864	A	T	0.009902	-0.0521046	0.0108679	1.6e-06	5.03631e-05	22.9858
	NO2	rs12203592	T	C	0.219436	0.0159413	0.002408	3.6e-11	9.6021e-05	43.8261
	NO2	rs7774286	C	T	0.998439	-0.150825	0.0308137	9.8e-07	5.2494e-05	23.9584
	NO2	rs2301747	G	C	0.121164	0.0153674	0.00308182	6.1e-07	5.44799e-05	24.8648
	NO2	rs79475047	C	T	0.027316	0.0327309	0.00619742	1.3e-07	6.1114e-05	27.8928
	NO2	rs243500	C	G	0.43408	0.00974672	0.00207029	2.5e-06	4.85632e-05	22.1642
	NO2	rs2464873	T	C	0.486855	-0.00987035	0.00202993	1.2e-06	5.18029e-05	23.6429
	NO2	rs62458757	G	C	0.034938	-0.0291188	0.00562839	2.3e-07	5.86444e-05	26.7656
	NO2	rs6954825	C	T	0.158973	0.0141308	0.00276484	3.2e-07	5.72324e-05	26.1211
	NO2	rs6960011	G	A	0.340039	-0.0103418	0.0021411	1.4e-06	5.11175e-05	23.3301
	NO2	rs844729	A	G	0.297535	-0.0106389	0.00222022	1.7e-06	5.03098e-05	22.9615
	NO2	rs139294369	A	T	0.022413	-0.0324398	0.00709526	4.8e-06	4.58008e-05	20.9034
	NO2	rs12541555	A	C	0.225097	-0.0111919	0.00242763	4e-06	4.65689e-05	21.254
	NO2	rs1374518	A	G	0.414633	-0.00991427	0.00205302	1.4e-06	5.10959e-05	23.3203
	NO2	rs10088346	T	C	0.221333	0.0113596	0.0024371	3.1e-06	4.76028e-05	21.7259
	NO2	rs4368946	C	T	0.062785	0.0200566	0.00419642	1.8e-06	5.00505e-05	22.8431
	NO2	rs77205736	T	C	0.274855	0.0154062	0.00226879	1.1e-11	0.000101026	46.1106
	NO2	rs2926098	T	C	0.081135	-0.0190743	0.00370865	2.7e-07	5.7958e-05	26.4523
	NO2	rs4736716	A	G	0.289929	-0.0108488	0.00224952	1.4e-06	5.09606e-05	23.2585
	NO2	rs1488708	C	T	0.499792	0.00966852	0.00203694	2.1e-06	4.93646e-05	22.53
	NO2	rs10983735	A	G	0.154461	0.0163113	0.00280286	5.9e-09	7.4202e-05	33.8667
	NO2	rs34623735	T	C	0.33449	0.0127201	0.00215704	3.7e-09	7.61912e-05	34.7746
	NO2	rs11191447	T	C	0.079724	0.0201855	0.00373343	6.4e-08	6.40484e-05	29.2322
	NO2	rs117866184	A	G	0.011817	-0.0442232	0.00953803	3.5e-06	4.71016e-05	21.4972
	NO2	rs35706972	A	G	0.014251	0.0432841	0.00874417	7.4e-07	5.36871e-05	24.5029
	NO2	rs7940779	T	C	0.045536	0.0233908	0.00487941	1.6e-06	5.03509e-05	22.9802
	NO2	rs1502243	A	G	0.241027	-0.0117158	0.00237002	7.7e-07	5.35414e-05	24.4364
	NO2	rs149827261	T	G	0.146904	-0.0150094	0.00291952	2.7e-07	5.79098e-05	26.4303
	NO2	rs55643000	G	T	0.062116	-0.0212536	0.00423721	5.3e-07	5.51257e-05	25.1596
	NO2	rs78887867	A	G	0.064493	-0.020973	0.00432316	1.2e-06	5.15667e-05	23.5351
	NO2	rs7134035	T	C	0.815489	0.0120907	0.00264164	4.7e-06	4.58996e-05	20.9485
	NO2	rs73210925	G	C	0.016457	0.0375025	0.0081573	4.3e-06	4.63106e-05	21.1361
	NO2	rs4105558	G	C	0.314508	-0.0114412	0.0021814	1.6e-07	6.02726e-05	27.5087
	NO2	rs149714494	A	G	0.019226	0.0372929	0.00796274	2.8e-06	4.80596e-05	21.9344
	NO2	rs9805280	A	G	0.71951	0.0107361	0.00225836	2e-06	4.95175e-05	22.5998
	NO2	rs1340900	A	G	0.582911	0.00952037	0.00205595	3.6e-06	4.69824e-05	21.4428
	NO2	rs9301887	T	C	0.252533	0.0109003	0.00233813	3.1e-06	4.76203e-05	21.7339
	NO2	rs9541967	C	T	0.123504	-0.0161111	0.00307711	1.6e-07	6.00636e-05	27.4134
	NO2	rs10144194	A	G	0.963966	0.0248749	0.00543972	4.8e-06	4.58166e-05	20.9107
	NO2	rs10498638	C	T	0.188308	0.0128399	0.00260969	8.7e-07	5.30391e-05	24.2071
	NO2	rs75801541	A	G	0.053136	-0.0208005	0.00451102	4e-06	4.65855e-05	21.2616
	NO2	rs11852894	T	C	0.067582	0.0185499	0.00405754	4.8e-06	4.57943e-05	20.9004
	NO2	rs35731545	T	C	0.018156	-0.0392087	0.00777391	4.6e-07	5.57359e-05	25.4381
	NO2	rs8046866	A	G	0.619722	0.00963094	0.00209775	4.4e-06	4.61831e-05	21.0779
	NO2	rs35695082	C	T	0.161343	0.0126808	0.00275333	4.1e-06	4.64761e-05	21.2117
	NO2	rs78387400	A	G	0.031972	0.0278317	0.00579114	1.5e-06	5.06061e-05	23.0967
	NO2	rs3859018	A	G	0.023153	-0.0311763	0.00675147	3.9e-06	4.67203e-05	21.3231
	NO2	rs72795429	T	C	0.029919	-0.0278229	0.00593887	2.8e-06	4.80894e-05	21.948
	NO2	rs78230451	T	C	0.113889	-0.0148375	0.00319564	3.4e-06	4.72344e-05	21.5578
	NO2	rs62062033	T	C	0.172431	0.0143524	0.00271933	1.3e-07	6.1034e-05	27.8563
	NO2	rs74818319	A	G	0.015622	0.0417036	0.00884246	2.4e-06	4.87364e-05	22.2433
	NO2	rs7225402	C	T	0.058308	-0.0248919	0.0043153	8e-09	7.29014e-05	33.273
	NO2	rs146690527	A	G	0.006701	-0.0656301	0.0131182	5.6e-07	5.48412e-05	25.0297
	NO2	rs72642437	T	C	0.003807	0.0911113	0.0181414	5.1e-07	5.52653e-05	25.2232
	NO2	rs2290154	C	T	0.358312	0.0111011	0.00211551	1.5e-07	6.03322e-05	27.5359
	NO2	rs73596615	A	G	0.134942	0.0141666	0.00296089	1.7e-06	5.01578e-05	22.8921
	NO2	rs1978728	T	C	0.360516	-0.0110223	0.00210849	1.7e-07	5.98754e-05	27.3275
	NO2	rs11668896	C	T	0.712833	0.0106584	0.00225305	2.2e-06	4.90337e-05	22.379
	NO2	rs4932780	T	C	0.032116	0.0278614	0.00573607	1.2e-06	5.16925e-05	23.5926
	NO2	rs6101627	T	C	0.142659	0.013297	0.00289651	4.4e-06	4.61754e-05	21.0744
	NO2	rs3991894	T	C	0.136914	-0.0137317	0.00298177	4.1e-06	4.6468e-05	21.2079
	NO2	rs714020	T	C	0.230477	0.0111893	0.00241221	3.5e-06	4.71442e-05	21.5166
	NOx	rs6667345	T	C	0.270243	0.0127208	0.00245612	2.2e-07	5.8773e-05	26.8243
	NOx	rs78379279	C	T	0.022291	-0.0344152	0.00716928	1.6e-06	5.04895e-05	23.0435
	NOx	rs7514956	C	A	0.186513	-0.0146107	0.00265248	3.6e-08	6.64787e-05	30.3414
	NOx	rs72654155	T	C	0.154516	0.0132622	0.00285461	3.4e-06	4.72923e-05	21.5842
	NOx	rs7519873	G	A	0.746491	-0.0112386	0.00238564	2.5e-06	4.86258e-05	22.1928
	NOx	rs28421715	T	A	0.065002	0.0195382	0.00417891	2.9e-06	4.78956e-05	21.8595
	NOx	rs35233950	T	C	0.240945	-0.0113409	0.00242635	3e-06	4.78675e-05	21.8467
	NOx	rs10172295	A	G	0.416147	-0.011327	0.0020994	6.8e-08	6.37801e-05	29.1097
	NOx	rs13421943	T	C	0.12919	0.0142508	0.00310448	4.4e-06	4.61694e-05	21.0717
	NOx	rs6749467	A	G	0.46467	-0.0116612	0.00209584	2.6e-08	6.78288e-05	30.9577
	NOx	rs13429081	T	A	0.186042	0.0134535	0.00266115	4.3e-07	5.59991e-05	25.5582
	NOx	rs13017899	G	T	0.995848	-0.0750258	0.0161527	3.4e-06	4.72698e-05	21.5739
	NOx	rs1897405	T	A	0.325756	0.0103989	0.00220355	2.4e-06	4.87957e-05	22.2704
	NOx	rs1491722	G	A	0.665894	-0.0101317	0.00219621	4e-06	4.66305e-05	21.2821
	NOx	rs144720952	G	A	0.014107	0.0498804	0.00975627	3.2e-07	5.72718e-05	26.1391
	NOx	rs4686547	G	T	0.674857	0.0106333	0.00220493	1.4e-06	5.09563e-05	23.2565
	NOx	rs12637852	T	C	0.288069	-0.010474	0.00227847	4.3e-06	4.63012e-05	21.1318
	NOx	rs2058582	G	A	0.698769	0.0105412	0.00225817	3e-06	4.77441e-05	21.7904
	NOx	rs1318845	C	T	0.200795	-0.0141726	0.00259612	4.8e-08	6.52972e-05	29.8022
	NOx	rs329177	A	G	0.611738	0.0108766	0.00217897	6e-07	5.45926e-05	24.9162
	NOx	rs27152	T	C	0.663321	-0.0118668	0.00221054	8e-08	6.31417e-05	28.8183
	NOx	rs10515343	G	A	0.012202	-0.0441969	0.00950358	3.3e-06	4.73873e-05	21.6275
	NOx	rs58824859	C	A	0.365075	0.0108149	0.00221233	1e-06	5.23595e-05	23.897
	NOx	rs17513184	T	C	0.083064	-0.0199381	0.00385523	2.3e-07	5.86023e-05	26.7464
	NOx	rs72808024	C	A	0.148435	-0.0170289	0.00290612	4.6e-09	7.52293e-05	34.3356
	NOx	rs74957515	G	C	0.129158	0.0157546	0.00313862	5.2e-07	5.52061e-05	25.1962
	NOx	rs77255816	T	C	0.036924	0.0299054	0.00547093	4.6e-08	6.54669e-05	29.8796
	NOx	rs12203592	T	C	0.219436	0.01937	0.00245674	3.2e-15	0.000136193	62.164
	NOx	rs9495443	C	A	0.334297	-0.0109825	0.00221464	7.1e-07	5.38823e-05	24.592
	NOx	rs115860766	T	C	0.077984	0.0200101	0.00383693	1.8e-07	5.95907e-05	27.1975
	NOx	rs7776279	A	G	0.714735	0.0116503	0.00229231	3.7e-07	5.65948e-05	25.8301
	NOx	rs62459096	T	G	0.070424	-0.0213039	0.00442163	1.4e-06	5.08633e-05	23.2141
	NOx	rs4721275	T	C	0.961737	-0.0263835	0.00538109	9.4e-07	5.26714e-05	24.0393
	NOx	rs73085844	G	T	0.025544	-0.033113	0.00653471	4e-07	5.62592e-05	25.6769
	NOx	rs6960011	G	A	0.340039	-0.010116	0.00218438	3.6e-06	4.6991e-05	21.4466
	NOx	rs62484669	A	G	0.097833	0.0160514	0.0034763	3.9e-06	4.67137e-05	21.3201
	NOx	rs55974805	T	C	0.245752	-0.0112793	0.00239879	2.6e-06	4.84431e-05	22.1094
	NOx	rs34969378	A	G	0.316195	-0.011321	0.00222498	3.6e-07	5.67239e-05	25.889
	NOx	rs17657881	C	T	0.017817	-0.036717	0.00779334	2.5e-06	4.86339e-05	22.1965
	NOx	rs77205736	T	C	0.274855	0.0132649	0.00231459	1e-08	7.19618e-05	32.8441
	NOx	rs1876281	T	C	0.407062	-0.0098003	0.0021248	4e-06	4.66118e-05	21.2736
	NOx	rs77160823	C	T	0.09755	-0.0174092	0.00374266	3.3e-06	4.74078e-05	21.6369
	NOx	rs10094026	A	G	0.130178	0.0150356	0.00307374	1e-06	5.24273e-05	23.9279
	NOx	rs77039956	G	T	0.032181	0.0274031	0.00588163	3.2e-06	4.75616e-05	21.7071
	NOx	rs118091313	A	G	0.003383	0.0902796	0.0177794	3.8e-07	5.64929e-05	25.7836
	NOx	rs10512199	C	G	0.048679	0.0226395	0.00481583	2.6e-06	4.84221e-05	22.0999
	NOx	rs10983735	A	G	0.154461	0.0138036	0.00285946	1.4e-06	5.10585e-05	23.3032
	NOx	rs3740390	T	C	0.079749	0.0201657	0.00381085	1.2e-07	6.13521e-05	28.0015
	NOx	rs4838594	C	T	0.239895	0.0114893	0.00243366	2.3e-06	4.88337e-05	22.2877
	NOx	rs11016225	G	A	0.399725	-0.00973085	0.00210617	3.8e-06	4.677e-05	21.3458
	NOx	rs7910200	T	C	0.424276	-0.0104209	0.00208943	6.1e-07	5.4501e-05	24.8744
	NOx	rs10734177	C	A	0.589252	-0.0100208	0.0021091	2e-06	4.94609e-05	22.574
	NOx	rs78539764	C	T	0.027798	-0.0301665	0.00632312	1.8e-06	4.98699e-05	22.7607
	NOx	rs11049241	A	C	0.186886	0.0137015	0.00265415	2.4e-07	5.83893e-05	26.6492
	NOx	rs12229183	A	C	0.211468	0.0122616	0.00252522	1.2e-06	5.16591e-05	23.5773
	NOx	rs10848647	G	A	0.588385	-0.00999055	0.00209863	1.9e-06	4.96545e-05	22.6624
	NOx	rs272086	A	G	0.729185	0.0107522	0.00232792	3.9e-06	4.67425e-05	21.3332
	NOx	rs72655898	G	A	0.286147	-0.0114916	0.00230233	6e-07	5.45853e-05	24.9129
	NOx	rs1960195	G	A	0.914941	0.0180017	0.00371351	1.2e-06	5.14883e-05	23.4994
	NOx	rs17183866	G	A	0.136756	-0.0141996	0.00301444	2.5e-06	4.86173e-05	22.189
	NOx	rs7169086	T	C	0.23543	-0.0111219	0.00242923	4.7e-06	4.59276e-05	20.9613
	NOx	rs11855821	A	G	0.282788	-0.0118372	0.00233568	4e-07	5.62756e-05	25.6844
	NOx	rs10852602	A	C	0.16794	0.0133403	0.00275738	1.3e-06	5.12848e-05	23.4065
	NOx	rs78969252	G	A	0.016376	-0.0376404	0.00812597	3.6e-06	4.70122e-05	21.4564
	NOx	rs74251463	C	G	0.057989	0.020564	0.00444855	3.8e-06	4.682e-05	21.3686
	NOx	rs80347400	G	A	0.150612	0.0134097	0.00291145	4.1e-06	4.64807e-05	21.2138
	NOx	rs17183854	G	T	0.013342	-0.0479436	0.0090906	1.3e-07	6.09429e-05	27.8147
	NOx	rs72642437	T	C	0.003807	0.0905396	0.0185051	9.9e-07	5.24499e-05	23.9382
	NOx	rs62119705	T	C	0.658049	0.0101454	0.00217592	3.1e-06	4.76327e-05	21.7396
	NOx	rs2838761	G	A	0.130449	0.0148075	0.00307066	1.4e-06	5.09508e-05	23.254
	NOx	rs117878224	G	A	0.011683	-0.0455208	0.00966778	2.5e-06	4.85756e-05	22.1699
	NOx	rs139916	A	G	0.248206	0.0114078	0.00240552	2.1e-06	4.92763e-05	22.4897
	SNP, single nucleotide polymorphisms; EA, effect allele; EAF, effect allele frequency; NEA, non-effect allele; SE, standard error.

## Sheet: Table S3
	Table S3. Single nucleotide polymorphisms (SNPs) associated with lifestyle factors.
	Exposure	SNP	EA	NEA	EAF	Beta	SE	P value	R2	F statisitc
	Leisure screen time	rs1577504	A	T	0.5499	-0.0173	0.0035	7.65e-07	4.64133e-05	24.4317
	Leisure screen time	rs12568522	A	G	0.3034	-0.0195	0.0042	2.76e-06	4.58806e-05	21.556
	Leisure screen time	rs4838890	T	C	0.5856	0.0166	0.0035	2.49e-06	4.27335e-05	22.4946
	Leisure screen time	rs197439	A	G	0.6007	-0.0259	0.0039	3.29e-11	9.3866e-05	44.103
	Leisure screen time	rs4433390	A	G	0.6883	-0.018	0.0038	1.85e-06	4.26254e-05	22.4376
	Leisure screen time	rs2794684	T	C	0.3908	-0.0195	0.0039	7.04e-07	5.32103e-05	24.9999
	Leisure screen time	rs10797047	A	G	0.3887	0.0211	0.0039	7.84e-08	6.22999e-05	29.2707
	Leisure screen time	rs2753298	A	G	0.3409	0.0193	0.0041	2.09e-06	4.71634e-05	22.1587
	Leisure screen time	rs6685030	A	G	0.48	-0.0217	0.0035	5.27e-10	7.3023e-05	38.4399
	Leisure screen time	rs58087899	A	G	0.4556	-0.0222	0.004	4.35e-08	6.95805e-05	30.8024
	Leisure screen time	rs12730533	T	C	0.2701	0.0197	0.0039	5.82e-07	4.88051e-05	25.5154
	Leisure screen time	rs1210225	C	G	0.7904	-0.0205	0.0043	1.59e-06	4.31776e-05	22.7284
	Leisure screen time	rs11587591	A	G	0.7344	0.0219	0.0039	2.23e-08	5.99026e-05	31.5324
	Leisure screen time	rs74336342	T	C	0.5162	0.018	0.0039	4.33e-06	4.53393e-05	21.3017
	Leisure screen time	rs74061346	A	C	0.904	-0.0306	0.0065	2.48e-06	4.71709e-05	22.1623
	Leisure screen time	rs4356058	A	G	0.6156	0.0207	0.004	1.68e-07	5.7e-05	26.7805
	Leisure screen time	rs6674314	A	G	0.8134	0.0274	0.0049	2.3e-08	6.65516e-05	31.2685
	Leisure screen time	rs1736523	C	G	0.5544	0.0216	0.0039	2.75e-08	6.52873e-05	30.6744
	Leisure screen time	rs3791033	T	C	0.669	0.0331	0.0041	3.66e-16	0.00013871	65.1758
	Leisure screen time	rs10889193	A	C	0.5547	0.0243	0.0039	4.94e-10	8.26278e-05	38.8223
	Leisure screen time	rs17378746	C	G	0.1987	-0.02	0.0044	4.92e-06	3.92504e-05	20.6611
	Leisure screen time	rs2186237	A	C	0.5862	0.0183	0.0037	6.23e-07	4.6472e-05	24.4623
	Leisure screen time	rs6424382	T	C	0.646	-0.0171	0.0037	3.01e-06	4.05767e-05	21.3593
	Leisure screen time	rs71658797	A	T	0.1223	0.0373	0.0058	1.81e-10	8.80242e-05	41.358
	Leisure screen time	rs556093835	T	G	0.8584	0.0273	0.0058	2.84e-06	5.00471e-05	22.1548
	Leisure screen time	rs12062845	A	C	0.2158	0.0281	0.0042	2.41e-11	8.50327e-05	44.7623
	Leisure screen time	rs4311996	A	T	0.3873	-0.0217	0.0039	3.56e-08	6.60175e-05	30.9591
	Leisure screen time	rs78304339	A	C	0.9347	0.0367	0.0078	2.58e-06	4.72085e-05	22.1381
	Leisure screen time	rs7099208	A	G	0.5722	-0.0165	0.0035	2.83e-06	4.2291e-05	22.2244
	Leisure screen time	rs7912495	A	G	0.5462	0.0205	0.0039	1.16e-07	5.89183e-05	27.6297
	Leisure screen time	rs841020	T	C	0.1923	0.0269	0.0044	1.15e-09	7.11218e-05	37.3764
	Leisure screen time	rs3781412	A	G	0.6005	-0.0208	0.0036	8.38e-09	6.42711e-05	33.3826
	Leisure screen time	rs1802669	A	G	0.3409	0.0384	0.0041	2.39e-21	0.00018703	87.7188
	Leisure screen time	rs1106274	T	C	0.5155	-0.016	0.0035	4.29e-06	3.97669e-05	20.8979
	Leisure screen time	rs2247156	A	G	0.1716	-0.0216	0.0047	3.84e-06	4.01915e-05	21.1208
	Leisure screen time	rs11252279	C	G	0.7522	-0.021	0.0044	1.62e-06	4.7209e-05	22.7788
	Leisure screen time	rs10823881	A	G	0.2522	0.0211	0.0044	1.8e-06	4.90383e-05	22.9963
	Leisure screen time	rs1017550	A	G	0.5864	0.0196	0.0035	2.85e-08	5.9674e-05	31.3599
	Leisure screen time	rs68049022	T	C	0.7981	0.0314	0.0048	6.18e-11	9.12504e-05	42.7932
	Leisure screen time	rs844126	A	G	0.4938	-0.0182	0.0039	2.4e-06	4.64399e-05	21.7777
	Leisure screen time	rs1890889	T	G	0.6561	-0.0177	0.0036	1.28e-06	4.59998e-05	24.1735
	Leisure screen time	rs79873788	T	C	0.0333	-0.0584	0.0109	9.4e-08	6.1213e-05	28.7059
	Leisure screen time	rs11200784	T	C	0.6745	0.0202	0.0041	9.13e-07	5.17619e-05	24.2735
	Leisure screen time	rs11256177	C	G	0.7007	-0.0177	0.0038	3.23e-06	4.12854e-05	21.6959
	Leisure screen time	rs10736477	A	G	0.6509	0.0197	0.0037	7.33e-08	5.39437e-05	28.3483
	Leisure screen time	rs61328432	A	G	0.5112	-0.0202	0.004	5.69e-07	5.76089e-05	25.5024
	Leisure screen time	rs7106545	A	G	0.4368	-0.0204	0.0039	1.38e-07	5.8345e-05	27.3608
	Leisure screen time	rs73030216	A	G	0.9178	0.0346	0.007	7.4e-07	5.20992e-05	24.4317
	Leisure screen time	rs117922884	T	C	0.0231	0.0591	0.0129	4.42e-06	4.47583e-05	20.9891
	Leisure screen time	rs116893435	T	C	0.0341	-0.0484	0.0106	4.64e-06	4.44587e-05	20.8486
	Leisure screen time	rs12283653	A	G	0.6063	-0.0182	0.0036	3.06e-07	4.86353e-05	25.5585
	Leisure screen time	rs4483592	T	C	0.1633	0.036	0.0052	3.97e-12	0.0001022	47.9288
	Leisure screen time	rs10792966	C	G	0.6876	0.0237	0.0041	1.06e-08	7.12518e-05	33.4139
	Leisure screen time	rs4943923	A	G	0.1157	-0.0273	0.0055	6.55e-07	4.68831e-05	24.6376
	Leisure screen time	rs1391954	T	G	0.4439	0.0245	0.004	1.51e-09	8.47436e-05	37.5155
	Leisure screen time	rs10765775	A	G	0.3915	-0.0223	0.0039	9.8e-09	6.79722e-05	32.6948
	Leisure screen time	rs79604658	A	T	0.0568	0.0412	0.0083	7.48e-07	5.25428e-05	24.6398
	Leisure screen time	rs10790158	C	G	0.3578	0.0209	0.004	1.74e-07	5.82163e-05	27.3005
	Leisure screen time	rs7969719	T	C	0.3131	0.0271	0.0037	4.46e-13	0.000102077	53.6455
	Leisure screen time	rs6489911	T	C	0.8256	-0.0233	0.0046	4.33e-07	4.90503e-05	25.6563
	Leisure screen time	rs60603793	T	G	0.4592	0.0188	0.004	3.2e-06	4.99006e-05	22.0899
	Leisure screen time	rs73405293	A	G	0.147	-0.0308	0.0054	1.35e-08	6.93715e-05	32.5321
	Leisure screen time	rs12425850	T	C	0.286	-0.0236	0.0039	1.37e-09	7.00059e-05	36.6179
	Leisure screen time	rs11057401	A	T	0.3135	-0.0181	0.0037	1.21e-06	4.55376e-05	23.9305
	Leisure screen time	rs10772643	T	C	0.8923	-0.0385	0.0062	5.88e-10	8.22242e-05	38.5599
	Leisure screen time	rs74996610	C	G	0.9545	-0.0513	0.0093	3.12e-08	6.48841e-05	30.4275
	Leisure screen time	rs10743729	T	C	0.7473	-0.0226	0.0043	1.53e-07	5.72694e-05	27.6235
	Leisure screen time	rs10877212	A	T	0.646	0.0183	0.0037	6.58e-07	4.65495e-05	24.4623
	Leisure screen time	rs11063367	A	G	0.6708	-0.0184	0.0038	1.03e-06	4.46156e-05	23.4459
	Leisure screen time	rs10876870	A	C	0.4286	-0.0194	0.0039	5.68e-07	5.27654e-05	24.7441
	Leisure screen time	rs61923270	A	G	0.0889	-0.0337	0.0069	1.2e-06	5.08671e-05	23.8539
	Leisure screen time	rs3759344	A	G	0.1063	0.0452	0.0062	4.26e-13	0.000113329	53.1486
	Leisure screen time	rs6539373	T	C	0.3497	0.0193	0.0037	1.65e-07	5.21323e-05	27.2088
	Leisure screen time	rs10862826	C	G	0.1589	-0.0222	0.0048	2.95e-06	4.07044e-05	21.3905
	Leisure screen time	rs61941721	T	C	0.8114	-0.0239	0.0049	1.32e-06	5.07317e-05	23.7904
	Leisure screen time	rs10745808	A	C	0.281	0.0213	0.0039	5.63e-08	5.67599e-05	29.8283
	Leisure screen time	rs7991062	C	G	0.6577	-0.0335	0.0041	1.32e-16	0.00014235	66.7606
	Leisure screen time	rs72659262	A	G	0.9202	-0.0354	0.0073	1.24e-06	5.0146e-05	23.5158
	Leisure screen time	rs7983353	A	G	0.4207	0.0181	0.0039	3.15e-06	4.5931e-05	21.539
	Leisure screen time	rs9569734	A	G	0.8439	0.0269	0.0053	4.57e-07	5.49321e-05	25.7603
	Leisure screen time	rs1379517	T	G	0.2686	-0.0181	0.0039	4.07e-06	4.0987e-05	21.539
	Leisure screen time	rs9317587	A	G	0.6135	-0.0166	0.0036	3.57e-06	4.04604e-05	21.2623
	Leisure screen time	rs4885561	A	G	0.7909	0.0229	0.0046	6.59e-07	5.13625e-05	24.783
	Leisure screen time	rs56021870	T	G	0.5822	-0.0184	0.0039	2.47e-06	4.74661e-05	22.2589
	Leisure screen time	rs9516693	A	G	0.4535	-0.018	0.0039	3.31e-06	4.54249e-05	21.3017
	Leisure screen time	rs657412	T	G	0.1047	-0.033	0.0058	1.4e-08	6.16001e-05	32.3721
	Leisure screen time	rs6571751	A	G	0.4978	-0.0184	0.0035	1.2e-07	5.25917e-05	27.6374
	Leisure screen time	rs45621931	T	C	0.2944	-0.0229	0.0042	6.9e-08	6.33932e-05	29.7283
	Leisure screen time	rs12885467	T	C	0.5144	-0.0171	0.0035	1.14e-06	4.54226e-05	23.8701
	Leisure screen time	rs35123475	T	C	0.2133	-0.025	0.0048	1.74e-07	5.78456e-05	27.1266
	Leisure screen time	rs2273326	T	C	0.1672	0.0237	0.0051	3.86e-06	4.60505e-05	21.5951
	Leisure screen time	rs12432029	A	G	0.0857	-0.0316	0.0069	4.36e-06	4.47254e-05	20.9737
	Leisure screen time	rs12896825	T	C	0.2048	-0.0225	0.0043	1.67e-07	5.21003e-05	27.3796
	Leisure screen time	rs35248647	A	G	0.2601	-0.0219	0.0044	5.4e-07	5.28272e-05	24.7731
	Leisure screen time	rs7154996	T	C	0.5269	0.0176	0.0038	4.56e-06	4.57442e-05	21.4514
	Leisure screen time	rs10400776	A	C	0.2593	-0.0259	0.0044	3.45e-09	7.38856e-05	34.6491
	Leisure screen time	rs6493084	A	G	0.6974	0.02	0.0038	1.07e-07	5.27116e-05	27.7007
	Leisure screen time	rs1814459	A	T	0.7326	-0.0234	0.0046	2.89e-07	5.84551e-05	25.877
	Leisure screen time	rs151331337	T	C	0.1603	-0.027	0.0052	2.69e-07	5.74901e-05	26.9599
	Leisure screen time	rs12324720	A	G	0.1756	-0.0271	0.0046	3.53e-09	6.60435e-05	34.7073
	Leisure screen time	rs56151256	A	C	0.7498	0.0285	0.0044	1.17e-10	8.94629e-05	41.9549
	Leisure screen time	rs2667382	A	T	0.4719	0.0224	0.0039	6.7e-09	7.03451e-05	32.9887
	Leisure screen time	rs55898076	T	C	0.7613	0.0216	0.0045	1.96e-06	4.91313e-05	23.0399
	Leisure screen time	rs11074658	T	C	0.5913	-0.0239	0.0039	9.21e-10	8.0081e-05	37.5547
	Leisure screen time	rs1684547	T	G	0.2938	0.0213	0.0042	5e-07	5.48447e-05	25.7193
	Leisure screen time	rs9922218	A	C	0.8504	0.0251	0.0054	3.13e-06	4.6072e-05	21.6052
	Leisure screen time	rs41278162	A	G	0.3476	0.019	0.0041	3.5e-06	4.57949e-05	21.4752
	Leisure screen time	rs4889530	A	T	0.3812	-0.0253	0.0039	1.32e-10	8.97368e-05	42.0833
	Leisure screen time	rs145454886	A	T	0.986	-0.08	0.0173	3.84e-06	4.56001e-05	21.3839
	Leisure screen time	rs7206202	C	G	0.3241	0.0187	0.0037	5.34e-07	4.86066e-05	25.5434
	Leisure screen time	rs152838	T	C	0.8921	-0.0284	0.0062	4.38e-06	4.47436e-05	20.9822
	Leisure screen time	rs11645541	A	G	0.4691	-0.0179	0.0036	6.91e-07	4.75473e-05	24.7229
	Leisure screen time	rs11647262	A	C	0.4058	0.0186	0.0039	2.2e-06	4.85035e-05	22.7455
	Leisure screen time	rs62068672	T	C	0.798	0.0263	0.0048	4.09e-08	6.40175e-05	30.0211
	Leisure screen time	rs2304466	A	G	0.5191	0.0166	0.0035	2.46e-06	4.31003e-05	22.4946
	Leisure screen time	rs2230316	A	G	0.6123	0.0176	0.0039	4.69e-06	4.21245e-05	20.3655
	Leisure screen time	rs4021776	T	C	0.446	-0.02	0.0041	1.06e-06	5.37527e-05	23.7953
	Leisure screen time	rs4790417	T	C	0.4257	0.0173	0.0035	1.1e-06	4.64922e-05	24.4317
	Leisure screen time	rs11652522	A	C	0.1052	0.0313	0.0058	6.8e-08	5.55887e-05	29.1227
	Leisure screen time	rs1860337	T	C	0.5953	-0.0253	0.0039	9.08e-11	8.97368e-05	42.0833
	Leisure screen time	rs112143304	A	T	0.2703	-0.0237	0.0045	1.69e-07	6.26579e-05	27.7377
	Leisure screen time	rs73420302	C	G	0.1785	-0.03	0.0051	3.04e-09	7.37849e-05	34.6019
	Leisure screen time	rs4800493	T	C	0.5403	0.0198	0.0038	1.45e-07	5.62666e-05	27.1495
	Leisure screen time	rs9955528	A	G	0.2637	-0.023	0.0044	1.37e-07	5.8267e-05	27.3243
	Leisure screen time	rs12962050	A	G	0.647	-0.0234	0.0036	1.18e-10	8.03947e-05	42.2498
	Leisure screen time	rs10163673	A	T	0.21	-0.0201	0.0043	2.51e-06	4.15788e-05	21.8501
	Leisure screen time	rs78451709	T	C	0.7954	-0.0277	0.0048	9.66e-09	7.1014e-05	33.3024
	Leisure screen time	rs1699892	T	C	0.5646	0.0173	0.0035	8.74e-07	4.64913e-05	24.4317
	Leisure screen time	rs57305612	A	G	0.7081	-0.0193	0.0042	4.69e-06	4.50292e-05	21.1161
	Leisure screen time	rs11152349	A	G	0.3026	-0.0183	0.0038	1.28e-06	4.41319e-05	23.1917
	Leisure screen time	rs8090565	T	G	0.5586	0.0164	0.0035	3.58e-06	4.20679e-05	21.9558
	Leisure screen time	rs892087	T	C	0.6335	-0.0284	0.004	9.98e-13	0.00010749	50.4098
	Leisure screen time	rs273512	T	C	0.4053	0.0178	0.0036	5.89e-07	4.65216e-05	24.4474
	Leisure screen time	rs12981974	C	G	0.1361	0.0337	0.0058	8.57e-09	7.19897e-05	33.76
	Leisure screen time	rs67081742	A	G	0.7055	0.0212	0.0044	1.43e-06	4.95042e-05	23.2148
	Leisure screen time	rs4306654	A	G	0.5384	0.0187	0.0039	1.16e-06	4.90264e-05	22.9907
	Leisure screen time	rs12463321	A	G	0.1478	-0.0317	0.0055	6.99e-09	7.0837e-05	33.2194
	Leisure screen time	rs6857	T	C	0.1689	-0.0369	0.0047	5.8e-15	0.000117646	61.639
	Leisure screen time	rs117573969	A	G	0.0669	0.0375	0.0079	2.25e-06	4.80491e-05	22.5324
	Leisure screen time	rs76246107	A	G	0.0822	0.0337	0.0072	3.01e-06	4.67167e-05	21.9075
	Leisure screen time	rs78093637	A	G	0.0264	0.0583	0.012	1.18e-06	5.03327e-05	23.6033
	Leisure screen time	rs4303732	T	C	0.598	0.0265	0.0035	5.37e-14	0.000109082	57.3263
	Leisure screen time	rs62151809	T	C	0.4526	0.0228	0.0039	3.9e-09	7.28797e-05	34.1774
	Leisure screen time	rs1448472	T	C	0.2929	-0.0194	0.0038	3.93e-07	4.95963e-05	26.0636
	Leisure screen time	rs58320051	A	G	0.4226	-0.0184	0.0039	2.18e-06	4.74661e-05	22.2589
	Leisure screen time	rs7581028	T	G	0.7243	0.022	0.0045	1.08e-06	5.39919e-05	23.9011
	Leisure screen time	rs189417654	A	G	0.264	-0.0228	0.0044	1.64e-07	5.72581e-05	26.8511
	Leisure screen time	rs6727997	A	G	0.3445	-0.0208	0.0037	2.04e-08	6.01359e-05	31.6025
	Leisure screen time	rs13017586	A	G	0.8493	-0.0401	0.0054	8.25e-14	0.000117584	55.1441
	Leisure screen time	rs7561715	A	C	0.0614	0.0415	0.0084	7.63e-07	5.2049e-05	24.4082
	Leisure screen time	rs10497248	T	C	0.2557	-0.0188	0.004	2.29e-06	4.20352e-05	22.0899
	Leisure screen time	rs114590429	A	C	0.1157	0.0376	0.006	3.03e-10	8.37403e-05	39.2709
	Leisure screen time	rs28780764	A	C	0.3516	0.0221	0.0042	1.56e-07	6.25447e-05	27.6875
	Leisure screen time	rs35515614	T	C	0.2542	-0.0216	0.0044	1.02e-06	5.13899e-05	24.0991
	Leisure screen time	rs2043989	C	G	0.5615	0.021	0.0039	6.33e-08	6.18273e-05	28.994
	Leisure screen time	rs12617870	T	G	0.5377	0.0263	0.0035	6.62e-14	0.000107439	56.4643
	Leisure screen time	rs17445724	T	C	0.8495	-0.0232	0.0049	1.95e-06	4.26582e-05	22.4172
	Leisure screen time	rs949782	A	C	0.2991	0.019	0.0038	5.93e-07	4.75723e-05	24.9999
	Leisure screen time	rs36079846	T	C	0.5205	-0.0239	0.0038	4.52e-10	8.43509e-05	39.5573
	Leisure screen time	rs2738284	A	G	0.3291	-0.0215	0.0037	7.05e-09	6.44807e-05	33.7654
	Leisure screen time	rs6750618	A	C	0.9072	0.0341	0.0066	2.69e-07	5.69238e-05	26.6943
	Leisure screen time	rs141609738	T	G	0.3159	0.0211	0.0042	4.54e-07	5.38196e-05	25.2386
	Leisure screen time	rs10175292	T	G	0.3591	0.018	0.0036	6.55e-07	4.75723e-05	24.9999
	Leisure screen time	rs62134209	A	G	0.953	0.0538	0.0091	3.28e-09	7.45327e-05	34.9526
	Leisure screen time	rs6744040	A	G	0.5101	0.0183	0.0035	1.79e-07	5.20211e-05	27.3379
	Leisure screen time	rs6721975	T	C	0.2309	-0.0241	0.0047	2.22e-07	5.60675e-05	26.2928
	Leisure screen time	rs17552400	C	G	0.0573	0.0401	0.0077	1.7e-07	5.17929e-05	27.121
	Leisure screen time	rs10189857	A	G	0.5653	-0.0274	0.0035	7.8e-15	0.000116614	61.2863
	Leisure screen time	rs539206278	A	C	0.9871	0.1294	0.0266	1.17e-06	5.34581e-05	23.6648
	Leisure screen time	rs6109194	A	G	0.658	0.0196	0.0037	9.54e-08	5.33979e-05	28.0613
	Leisure screen time	rs6102913	T	C	0.4736	-0.0193	0.0035	2.97e-08	5.78615e-05	30.4072
	Leisure screen time	rs6073637	A	C	0.5235	-0.0225	0.0038	4.59e-09	7.47589e-05	35.0587
	Leisure screen time	rs6100070	T	G	0.2137	-0.0204	0.0043	2.12e-06	4.28293e-05	22.5072
	Leisure screen time	rs17801257	A	G	0.1247	-0.0292	0.0053	2.92e-08	5.776e-05	30.3537
	Leisure screen time	rs6587224	C	G	0.5119	0.0174	0.0035	5.96e-07	4.70306e-05	24.715
	Leisure screen time	rs6010651	A	C	0.6201	0.0235	0.004	3.34e-09	7.36006e-05	34.5155
	Leisure screen time	rs2826785	T	C	0.2288	-0.0241	0.0046	1.21e-07	5.85316e-05	27.4484
	Leisure screen time	rs2834508	A	C	0.277	-0.0178	0.0039	4.84e-06	3.96397e-05	20.831
	Leisure screen time	rs11701316	T	C	0.6638	-0.0195	0.0041	1.79e-06	4.82368e-05	22.6204
	Leisure screen time	rs9984236	A	G	0.3909	-0.0206	0.0039	1.57e-07	5.94945e-05	27.8999
	Leisure screen time	rs136537	A	G	0.3675	-0.0184	0.004	3.72e-06	4.51225e-05	21.1599
	Leisure screen time	rs469565	T	C	0.7735	-0.0259	0.0046	1.51e-08	6.76008e-05	31.7017
	Leisure screen time	rs2079220	C	G	0.7057	0.0194	0.0038	3.76e-07	4.95967e-05	26.0636
	Leisure screen time	rs137124	T	C	0.8223	0.0236	0.0046	2.23e-07	5.0087e-05	26.3213
	Leisure screen time	rs971136	A	G	0.6131	0.0197	0.004	8.66e-07	5.17235e-05	24.2555
	Leisure screen time	rs9867121	A	C	0.1829	-0.0317	0.005	2.02e-10	8.57114e-05	40.1954
	Leisure screen time	rs34046554	T	G	0.6481	-0.0197	0.004	9.42e-07	5.17235e-05	24.2555
	Leisure screen time	rs9821242	T	C	0.4308	0.019	0.0039	1.15e-06	5.0612e-05	23.7343
	Leisure screen time	rs16824038	A	G	0.8363	-0.0238	0.0047	3.66e-07	4.87946e-05	25.6423
	Leisure screen time	rs7627290	A	G	0.5413	-0.0231	0.0039	2.36e-09	7.481e-05	35.0827
	Leisure screen time	rs10049091	A	G	0.3225	0.0173	0.0038	4.67e-06	3.96254e-05	20.7264
	Leisure screen time	rs498414	A	C	0.0393	0.0458	0.01	4.15e-06	4.4731e-05	20.9763
	Leisure screen time	rs6444297	A	C	0.4177	-0.0187	0.0039	1.43e-06	4.90264e-05	22.9907
	Leisure screen time	rs9834970	T	C	0.5011	0.0185	0.0035	1.1e-07	5.34133e-05	27.9387
	Leisure screen time	rs76404484	A	G	0.13	-0.028	0.0058	1.19e-06	4.96977e-05	23.3055
	Leisure screen time	rs201524952	T	C	0.3583	-0.0278	0.0057	1.23e-06	5.37339e-05	23.7869
	Leisure screen time	rs7615206	T	C	0.5703	-0.0345	0.0035	1.5e-22	0.00018614	97.1629
	Leisure screen time	rs9849524	A	G	0.2012	-0.0245	0.0048	4.17e-07	5.5555e-05	26.0524
	Leisure screen time	rs9859634	T	C	0.8516	-0.0233	0.0049	2.01e-06	4.30267e-05	22.6109
	Leisure screen time	rs76267866	A	T	0.7923	-0.0297	0.0047	3.53e-10	8.51486e-05	39.9315
	Leisure screen time	rs62244886	C	G	0.6038	0.0239	0.0039	1.24e-09	8.0081e-05	37.5547
	Leisure screen time	rs7430216	T	C	0.2227	0.025	0.0042	2.5e-09	6.77356e-05	35.4307
	Leisure screen time	rs7616518	A	G	0.4499	0.0196	0.0035	2.6e-08	5.96744e-05	31.3599
	Leisure screen time	rs13089152	T	C	0.6691	-0.0234	0.0041	1.53e-08	6.94595e-05	32.5733
	Leisure screen time	rs1375561	T	C	0.6534	0.0232	0.0037	2.55e-10	7.48126e-05	39.3161
	Leisure screen time	rs9713906	A	T	0.7409	-0.0235	0.004	3.86e-09	6.56783e-05	34.5155
	Leisure screen time	rs13134095	A	G	0.4898	0.0168	0.0035	1.99e-06	4.3843e-05	23.0399
	Leisure screen time	rs4460001	A	C	0.4324	-0.0193	0.0035	4.45e-08	5.78613e-05	30.4072
	Leisure screen time	rs61166637	C	G	0.6711	0.0242	0.0043	1.48e-08	7.15475e-05	31.6732
	Leisure screen time	rs17656496	T	C	0.0521	-0.0392	0.0078	5.69e-07	4.80614e-05	25.257
	Leisure screen time	rs11932864	A	G	0.6603	-0.0198	0.0038	1.73e-07	5.39849e-05	27.1495
	Leisure screen time	rs10020721	T	C	0.9399	0.0373	0.0074	4.31e-07	4.83468e-05	25.407
	Leisure screen time	rs2877828	T	C	0.1973	0.0223	0.0048	3.61e-06	4.60262e-05	21.5837
	Leisure screen time	rs16896229	T	C	0.1357	0.03	0.0051	3.8e-09	6.61513e-05	34.6019
	Leisure screen time	rs10222987	A	G	0.6355	-0.0209	0.0036	9.02e-09	6.43327e-05	33.7043
	Leisure screen time	rs28470725	T	G	0.4599	0.0185	0.004	3.53e-06	4.56143e-05	21.3905
	Leisure screen time	rs4580693	A	G	0.5554	-0.0209	0.0039	6.57e-08	6.12399e-05	28.7185
	Leisure screen time	rs743699	A	G	0.7433	-0.0267	0.0044	1.18e-09	7.85201e-05	36.8227
	Leisure screen time	rs12642617	T	C	0.2851	0.0207	0.0039	1.01e-07	5.38588e-05	28.1715
	Leisure screen time	rs17609046	A	T	0.0712	-0.0343	0.007	1.07e-06	4.56887e-05	24.0099
	Leisure screen time	rs6554207	T	C	0.3882	0.0176	0.0036	9.23e-07	4.54817e-05	23.9011
	Leisure screen time	rs7678421	T	G	0.8652	-0.0235	0.0051	4.07e-06	4.04029e-05	21.2321
	Leisure screen time	rs4416502	A	G	0.1996	0.0291	0.0048	1.38e-09	7.83731e-05	36.7537
	Leisure screen time	rs114188686	A	G	0.0373	0.0505	0.0102	7.67e-07	5.22706e-05	24.5121
	Leisure screen time	rs4957699	A	C	0.3637	-0.0197	0.0039	4.24e-07	5.28801e-05	25.5153
	Leisure screen time	rs57585211	T	G	0.8268	-0.0253	0.0051	5.93e-07	5.24778e-05	24.6093
	Leisure screen time	rs396321	T	C	0.5128	-0.0213	0.0035	1.29e-09	7.09595e-05	37.0358
	Leisure screen time	rs10059100	A	G	0.6074	-0.0215	0.0039	4.68e-08	6.48063e-05	30.3911
	Leisure screen time	rs10041724	T	C	0.8071	0.0249	0.0044	1.51e-08	6.09399e-05	32.0252
	Leisure screen time	rs113838095	T	C	0.6684	-0.0321	0.0043	6.88e-14	0.000125878	55.7277
	Leisure screen time	rs140388611	T	C	0.667	0.0208	0.0043	1.2e-06	5.28565e-05	23.3985
	Leisure screen time	rs2964252	A	G	0.3158	-0.0235	0.0037	3.16e-10	7.67598e-05	40.3395
	Leisure screen time	rs1947066	A	G	0.8028	0.0298	0.0044	8.54e-12	8.72819e-05	45.8697
	Leisure screen time	rs173692	A	G	0.4087	-0.019	0.0039	1.02e-06	5.0612e-05	23.7343
	Leisure screen time	rs13174602	T	C	0.463	0.0166	0.0036	2.92e-06	4.08658e-05	21.2623
	Leisure screen time	rs34160916	T	C	0.381	0.0196	0.004	7.25e-07	5.11997e-05	24.0099
	Leisure screen time	rs6888907	T	C	0.7649	-0.0194	0.0041	2.34e-06	4.26042e-05	22.389
	Leisure screen time	rs6869470	T	C	0.3839	-0.017	0.0036	1.72e-06	4.24335e-05	22.2993
	Leisure screen time	rs6879176	A	G	0.4488	0.0178	0.0039	4.1e-06	4.44211e-05	20.8309
	Leisure screen time	rs1445979	A	T	0.3862	0.0196	0.0036	3.74e-08	5.6405e-05	29.6419
	Leisure screen time	rs262890	A	G	0.7003	-0.0344	0.0042	2.06e-16	0.000143039	67.0836
	Leisure screen time	rs13188731	A	T	0.3671	0.0218	0.004	4.54e-08	6.33378e-05	29.7024
	Leisure screen time	rs364789	A	G	0.7568	0.0275	0.0044	2.79e-10	8.09537e-05	39.0623
	Leisure screen time	rs617219	A	C	0.6339	0.0189	0.0039	1.13e-06	4.86726e-05	23.4851
	Leisure screen time	rs35843836	A	T	0.633	-0.021	0.0042	4.69e-07	5.64738e-05	24.9999
	Leisure screen time	rs6556840	A	G	0.3366	0.0204	0.0037	4.32e-08	5.78472e-05	30.3987
	Leisure screen time	rs458390	A	T	0.8128	0.024	0.0052	3.57e-06	4.81201e-05	21.3017
	Leisure screen time	rs249960	A	G	0.8178	0.0298	0.005	2.43e-09	7.57456e-05	35.5214
	Leisure screen time	rs78394231	T	C	0.9015	-0.0381	0.0065	3.53e-09	7.32637e-05	34.3575
	Leisure screen time	rs12206846	A	G	0.4054	0.0199	0.0036	2.1e-08	5.81449e-05	30.5562
	Leisure screen time	rs2473977	A	T	0.3862	0.0195	0.0036	4.6e-08	5.58309e-05	29.3402
	Leisure screen time	rs558134	T	C	0.3835	-0.0225	0.0036	5.05e-10	7.43314e-05	39.0624
	Leisure screen time	rs4534007	A	G	0.5798	0.0183	0.0035	2e-07	5.20224e-05	27.3379
	Leisure screen time	rs1188887	T	C	0.6673	0.0258	0.0041	2.47e-10	8.4437e-05	39.5977
	Leisure screen time	rs58541850	A	G	0.0585	0.0522	0.0082	1.72e-10	8.64119e-05	40.5239
	Leisure screen time	rs6456107	T	C	0.1265	-0.029	0.0058	5.03e-07	5.33107e-05	24.9999
	Leisure screen time	rs10946296	A	G	0.464	-0.0169	0.0036	2.29e-06	4.19364e-05	22.0377
	Leisure screen time	rs372277824	A	G	0.1092	-0.031	0.0065	1.62e-06	5.13814e-05	22.7455
	Leisure screen time	rs61747867	T	G	0.2058	-0.0245	0.0049	4.36e-07	5.33107e-05	24.9999
	Leisure screen time	rs77062257	A	T	0.7645	-0.025	0.005	5.94e-07	5.33107e-05	24.9999
	Leisure screen time	rs9278004	A	G	0.1487	0.0394	0.0057	3.23e-12	0.000107926	47.7794
	Leisure screen time	rs6457816	T	C	0.9343	-0.0414	0.007	3.97e-09	6.65599e-05	34.9786
	Leisure screen time	rs57349798	A	G	0.4046	-0.019	0.0039	1.41e-06	5.0612e-05	23.7343
	Leisure screen time	rs7760749	C	G	0.276	0.0222	0.0043	2.17e-07	5.68384e-05	26.6543
	Leisure screen time	rs9382477	T	C	0.178	0.0237	0.005	2.49e-06	4.79108e-05	22.4675
	Leisure screen time	rs12214364	T	G	0.5869	-0.0197	0.0036	4.87e-08	5.69833e-05	29.9451
	Leisure screen time	rs35837830	A	T	0.8002	-0.0225	0.0049	3.64e-06	4.49625e-05	21.0849
	Leisure screen time	rs6901382	T	C	0.4512	-0.0186	0.0039	2.22e-06	4.85035e-05	22.7455
	Leisure screen time	rs12203165	A	T	0.281	-0.0197	0.0039	4.09e-07	4.85533e-05	25.5154
	Leisure screen time	rs1734729	T	C	0.2414	-0.0195	0.0041	2.35e-06	4.30452e-05	22.6204
	Leisure screen time	rs2470956	A	T	0.4357	-0.0211	0.0039	5.53e-08	6.24175e-05	29.2707
	Leisure screen time	rs2529484	C	G	0.3515	0.0221	0.0036	1.39e-09	7.1711e-05	37.6858
	Leisure screen time	rs13235840	A	T	0.8186	-0.0313	0.005	3.48e-10	8.35622e-05	39.1874
	Leisure screen time	rs17621391	T	C	0.7351	0.0243	0.0041	2.11e-09	6.68429e-05	35.1272
	Leisure screen time	rs57624556	T	C	0.7908	0.0268	0.0051	1.2e-07	6.23783e-05	27.6139
	Leisure screen time	rs34776209	T	C	0.2472	0.0211	0.0045	2.15e-06	4.68832e-05	21.9856
	Leisure screen time	rs79682948	A	T	0.1875	-0.0253	0.0049	3.17e-07	5.68489e-05	26.6592
	Leisure screen time	rs76602404	T	C	0.2194	-0.0266	0.0049	4.38e-08	6.65693e-05	29.4693
	Leisure screen time	rs57092155	T	C	0.7826	-0.0268	0.0047	8.8e-09	6.93332e-05	32.5141
	Leisure screen time	rs7786067	T	C	0.321	0.0218	0.0041	1.13e-07	6.0286e-05	28.2711
	Leisure screen time	rs10486877	A	G	0.8908	-0.0279	0.0056	5.36e-07	4.72335e-05	24.8217
	Leisure screen time	rs56256691	A	G	0.3817	-0.0183	0.004	4e-06	4.46334e-05	20.9305
	Leisure screen time	rs10253861	A	G	0.5514	-0.0198	0.0035	1.48e-08	6.08982e-05	32.0031
	Leisure screen time	rs11765049	A	C	0.8304	-0.0236	0.0051	3.96e-06	4.56627e-05	21.4132
	Leisure screen time	rs11972285	A	G	0.8456	0.0384	0.0056	5.13e-12	0.000106212	47.0202
	Leisure screen time	rs13258452	T	C	0.2268	-0.0244	0.0046	1.34e-07	5.99978e-05	28.136
	Leisure screen time	rs7821826	T	C	0.4925	0.0207	0.0035	3.25e-09	6.67278e-05	34.9786
	Leisure screen time	rs12541615	T	C	0.8173	-0.0229	0.005	3.83e-06	4.4731e-05	20.9763
	Leisure screen time	rs13270758	A	G	0.3337	-0.0175	0.0037	2.29e-06	4.26764e-05	22.3703
	Leisure screen time	rs3946847	A	G	0.2062	-0.0224	0.0047	2.25e-06	4.8437e-05	22.7143
	Leisure screen time	rs2717559	A	G	0.5592	0.0207	0.0039	1.11e-07	6.00735e-05	28.1715
	Leisure screen time	rs7386207	T	C	0.5635	0.0191	0.0039	9.93e-07	5.11461e-05	23.9848
	Leisure screen time	rs209972	T	C	0.8276	-0.0226	0.0046	1.09e-06	4.60482e-05	24.1379
	Leisure screen time	rs76943829	T	C	0.0516	0.0449	0.0087	2.69e-07	5.67972e-05	26.635
	Leisure screen time	rs11776939	T	C	0.3758	0.0182	0.004	4.67e-06	4.4147e-05	20.7024
	Leisure screen time	rs148614983	T	G	0.0068	-0.1205	0.0245	8.39e-07	5.15842e-05	24.1902
	Leisure screen time	rs421151	A	G	0.9161	-0.036	0.0063	1.09e-08	6.22914e-05	32.6529
	Leisure screen time	rs9657119	A	G	0.4613	-0.0166	0.0035	1.85e-06	4.29134e-05	22.4946
	Leisure screen time	rs12678836	A	C	0.424	0.0232	0.0035	5.37e-11	8.38176e-05	43.9378
	Leisure screen time	rs72671494	T	C	0.8595	-0.0349	0.0056	5.72e-10	8.28202e-05	38.8394
	Leisure screen time	rs644547	A	G	0.2374	0.0221	0.0045	9.62e-07	5.14322e-05	24.1189
	Leisure screen time	rs2382273	T	C	0.575	0.0189	0.0039	1.09e-06	5.00807e-05	23.4851
	Leisure screen time	rs1999065	T	C	0.3377	0.0249	0.0037	1.24e-11	8.59754e-05	45.2891
	Leisure screen time	rs7023642	T	C	0.6799	-0.0196	0.0041	1.92e-06	4.87327e-05	22.853
	Leisure screen time	rs677355	A	G	0.3179	0.0204	0.0043	2.27e-06	5.08432e-05	22.5072
	Leisure screen time	rs13301354	T	C	0.3769	-0.0211	0.0037	1.22e-08	6.25474e-05	32.5207
	Leisure screen time	rs28458909	T	C	0.1229	0.0364	0.0059	5.48e-10	8.11635e-05	38.0625
	Leisure screen time	rs7875078	A	C	0.4517	0.0204	0.0035	7.41e-09	6.44933e-05	33.9721
	Leisure screen time	rs71513263	T	C	0.1451	0.0292	0.0054	8.52e-08	6.23517e-05	29.2399
	Leisure screen time	rs2783992	T	C	0.5385	-0.0242	0.0038	3.36e-10	8.64816e-05	40.5566
	Leisure screen time	rs34864022	A	G	0.9341	-0.0483	0.0078	4.71e-10	8.17649e-05	38.3445
	Leisure screen time	rs62550464	T	G	0.6841	-0.0194	0.0041	2.52e-06	4.77433e-05	22.389
	Leisure screen time	rs7042628	T	C	0.1009	-0.0285	0.0058	8.99e-07	4.58384e-05	24.1453
	Leisure screen time	rs111384356	T	C	0.0187	0.0686	0.0145	2.3e-06	4.77297e-05	22.3826
	MVPA	rs11582652	A	T	0.0748	-0.0378	0.008	2.63e-06	4.83643e-05	22.3255
	MVPA	rs3818978	A	T	0.3774	-0.0167	0.0033	2.83e-07	4.23202e-05	25.6096
	MVPA	rs6427178	A	G	0.5318	0.0229	0.0041	1.71e-08	6.43669e-05	31.1962
	MVPA	rs10752851	C	G	0.8271	-0.0202	0.0043	2.16e-06	3.71869e-05	22.0681
	MVPA	rs61817959	A	G	0.1869	0.0257	0.0052	8.11e-07	5.03993e-05	24.4263
	MVPA	rs1970530	A	G	0.6003	-0.0183	0.0037	5.83e-07	4.96768e-05	24.4623
	MVPA	rs2994326	T	C	0.1863	-0.0245	0.0053	3.21e-06	4.41836e-05	21.3687
	MVPA	rs141997352	C	G	0.9593	0.0528	0.0108	1.06e-06	4.95237e-05	23.9011
	MVPA	rs17315037	T	C	0.1366	0.0279	0.0059	2.81e-06	4.62365e-05	22.3616
	MVPA	rs61873605	A	G	0.0425	0.0474	0.0101	2.69e-06	4.55257e-05	22.0248
	MVPA	rs11258251	T	C	0.0686	0.0375	0.0081	3.76e-06	4.45847e-05	21.4334
	MVPA	rs113428529	A	C	0.8629	0.0294	0.006	1.06e-06	4.99439e-05	24.0099
	MVPA	rs529031892	A	C	0.1296	-0.0337	0.0065	2.13e-07	5.98764e-05	26.8801
	MVPA	rs2124533	T	G	0.0895	0.027	0.0056	1.3e-06	3.92292e-05	23.2461
	MVPA	rs10821761	T	C	0.388	0.0175	0.0032	6.71e-08	4.94918e-05	29.9071
	MVPA	rs7920171	A	G	0.2311	-0.0253	0.0048	1.62e-07	5.74244e-05	27.7816
	MVPA	rs10733894	T	G	0.7177	-0.0217	0.0047	3.29e-06	4.74845e-05	21.3168
	MVPA	rs12357890	A	G	0.4431	0.0225	0.0041	4.77e-08	6.22491e-05	30.1159
	MVPA	rs568546	T	C	0.5206	0.0237	0.0041	5.89e-09	6.90656e-05	33.4139
	MVPA	rs499878	T	C	0.6596	0.0155	0.0034	3.63e-06	3.43938e-05	20.7828
	MVPA	rs7937283	A	G	0.4338	0.0201	0.0041	9.69e-07	4.96782e-05	24.0338
	MVPA	rs11603071	T	C	0.6159	-0.0157	0.0032	1.11e-06	3.97184e-05	24.0712
	MVPA	rs71484006	A	G	0.9896	-0.098	0.0202	1.19e-06	4.89599e-05	23.5368
	MVPA	rs12577385	T	G	0.8908	0.0244	0.0052	2.47e-06	3.67591e-05	22.0177
	MVPA	rs1424751	C	G	0.4375	-0.0245	0.0044	2.53e-08	6.9063e-05	31.0045
	MVPA	rs4939521	A	G	0.1384	0.0276	0.0059	2.74e-06	4.52332e-05	21.8833
	MVPA	rs1625595	T	C	0.4748	-0.0213	0.0032	1.9e-11	7.47653e-05	44.3055
	MVPA	rs34881295	T	C	0.2398	0.0227	0.0048	2.27e-06	4.62287e-05	22.3649
	MVPA	rs6663	A	G	0.2369	-0.0188	0.0037	3.72e-07	4.28687e-05	25.8173
	MVPA	rs12299803	A	G	0.3805	0.0194	0.0042	3.84e-06	4.4101e-05	21.3355
	MVPA	rs180949249	A	G	0.97	0.0649	0.0131	7.55e-07	5.07327e-05	24.544
	MVPA	rs2634673	C	G	0.3355	0.0221	0.0044	4.9e-07	5.47536e-05	25.2277
	MVPA	rs77814440	T	C	0.0458	-0.0553	0.011	4.66e-07	5.28798e-05	25.2734
	MVPA	rs144290688	A	T	0.9825	0.0759	0.0159	1.94e-06	4.72005e-05	22.787
	MVPA	rs2066667	C	G	0.0386	0.0384	0.0083	4.17e-06	3.66522e-05	21.4045
	MVPA	rs200633194	T	C	0.5891	-0.0221	0.0044	5.04e-07	5.61957e-05	25.2277
	MVPA	rs9597783	T	C	0.7825	-0.0235	0.0049	1.96e-06	4.76432e-05	23.0007
	MVPA	rs2281767	T	C	0.4874	-0.0163	0.0032	2.8e-07	4.30106e-05	25.9462
	MVPA	rs8009011	T	C	0.6293	0.0204	0.0042	1.17e-06	4.87645e-05	23.5917
	MVPA	rs12884911	T	C	0.5048	-0.019	0.0039	1.34e-06	4.49093e-05	23.7343
	MVPA	rs3109891	T	C	0.5969	0.0172	0.0032	8.96e-08	4.79712e-05	28.8905
	MVPA	rs4378569	T	C	0.7384	-0.0231	0.0046	5.73e-07	5.21253e-05	25.2178
	MVPA	rs8025068	T	G	0.2003	0.0254	0.0051	6.96e-07	5.13786e-05	24.8042
	MVPA	rs1029420	T	C	0.3908	-0.0159	0.0034	2.24e-06	3.68966e-05	21.8693
	MVPA	rs62036810	A	G	0.9278	-0.0393	0.0083	2.08e-06	4.67101e-05	22.4196
	MVPA	rs4790841	T	C	0.1556	0.0295	0.0056	1.58e-07	5.74805e-05	27.7502
	MVPA	rs385301	T	C	0.2637	-0.0284	0.0047	1.6e-09	7.90688e-05	36.5123
	MVPA	rs17762954	T	C	0.2036	0.0211	0.0041	2.47e-07	4.3701e-05	26.4847
	MVPA	rs9903845	A	C	0.3104	-0.02	0.0034	6.05e-09	5.72629e-05	34.602
	MVPA	rs1788761	A	G	0.5026	-0.0213	0.0041	1.55e-07	5.57866e-05	26.9892
	MVPA	rs150532400	A	G	0.9674	-0.0549	0.0118	3.15e-06	4.48372e-05	21.6461
	MVPA	rs7233417	A	G	0.3531	-0.016	0.0033	1.05e-06	3.89105e-05	23.5077
	MVPA	rs1788056	C	G	0.4337	-0.0239	0.0044	6.06e-08	6.57219e-05	29.5045
	MVPA	rs1531519	T	C	0.3797	0.0166	0.0033	3.73e-07	4.18769e-05	25.3039
	MVPA	rs8094118	T	G	0.7382	0.0242	0.0046	1.82e-07	5.72075e-05	27.6766
	MVPA	rs12973258	T	C	0.8199	0.0252	0.0047	6.79e-08	5.87248e-05	28.7477
	MVPA	rs10411862	T	C	0.7464	-0.0234	0.0047	5.89e-07	5.13442e-05	24.7876
	MVPA	rs1160545	T	C	0.4025	0.0249	0.0041	1.73e-09	7.62361e-05	36.8833
	MVPA	rs374576715	A	G	0.0816	0.0418	0.0077	5.1e-08	6.56434e-05	29.4693
	MVPA	rs28873988	T	C	0.3897	-0.0191	0.0042	4.53e-06	4.27477e-05	20.6808
	MVPA	rs10210242	A	G	0.4989	0.016	0.0032	3.63e-07	4.16205e-05	24.9999
	MVPA	rs7584099	A	G	0.5281	0.0147	0.0032	3.59e-06	3.52132e-05	21.1025
	MVPA	rs11690624	A	G	0.1278	-0.022	0.0048	4.31e-06	3.47639e-05	21.0069
	MVPA	rs11687833	T	C	0.4043	-0.0195	0.0042	3.11e-06	4.45568e-05	21.556
	MVPA	rs288070	A	G	0.0982	0.0332	0.0068	1.11e-06	4.9272e-05	23.8373
	MVPA	rs2675124	A	G	0.204	-0.0203	0.0039	2.45e-07	4.48402e-05	27.0933
	MVPA	rs7422036	A	G	0.8467	-0.0203	0.0044	4.28e-06	3.52353e-05	21.2856
	MVPA	rs356979	T	C	0.2856	0.0167	0.0035	2.25e-06	3.76756e-05	22.7665
	MVPA	rs56364005	A	C	0.0327	0.0622	0.0134	3.26e-06	4.79953e-05	21.5461
	MVPA	rs11692141	T	C	0.288	-0.0222	0.0045	1e-06	5.05187e-05	24.3377
	MVPA	rs6043544	A	G	0.9859	-0.0793	0.0171	3.67e-06	4.22674e-05	21.5056
	MVPA	rs57012093	T	C	0.0292	-0.0625	0.0122	2.99e-07	5.44766e-05	26.2445
	MVPA	rs73151215	A	T	0.0933	-0.035	0.0074	2.26e-06	4.9831e-05	22.3702
	MVPA	rs716117	A	G	0.4302	0.0154	0.0032	1.32e-06	3.83274e-05	23.1601
	MVPA	rs62214695	A	G	0.0788	-0.0355	0.0076	2.63e-06	4.51749e-05	21.8186
	MVPA	rs3788337	A	G	0.3528	0.0158	0.0033	1.65e-06	3.82534e-05	22.9237
	MVPA	rs139854231	T	C	0.0409	-0.0517	0.0104	6.17e-07	5.10805e-05	24.7123
	MVPA	rs2668196	A	T	0.1908	-0.0227	0.004	2.09e-08	5.35121e-05	32.2055
	MVPA	rs1346604	C	G	0.4692	-0.015	0.0032	2.39e-06	3.63621e-05	21.9726
	MVPA	rs336620	C	G	0.3016	0.0243	0.0044	4.05e-08	6.30438e-05	30.5004
	MVPA	rs73054061	T	C	0.2924	0.0206	0.0045	3.85e-06	4.33165e-05	20.956
	MVPA	rs7613360	T	C	0.3963	-0.0247	0.0042	2.77e-09	7.1487e-05	34.5855
	MVPA	rs9847090	A	T	0.4762	0.019	0.0039	1.42e-06	4.52166e-05	23.7343
	MVPA	rs114082493	T	C	0.977	0.0673	0.0145	3.33e-06	4.49778e-05	21.5423
	MVPA	rs80135103	A	G	0.9676	0.0538	0.0115	3e-06	4.543e-05	21.886
	MVPA	rs1691471	T	C	0.3759	0.0379	0.0042	1.73e-19	0.000168294	81.4288
	MVPA	rs62336281	T	C	0.0703	0.0396	0.0081	9.13e-07	4.97177e-05	23.9011
	MVPA	rs144949097	A	G	0.0227	0.0727	0.0138	1.43e-07	5.73652e-05	27.7529
	MVPA	rs362312	T	C	0.5747	-0.02	0.0041	1.2e-06	4.91851e-05	23.7953
	MVPA	rs13111327	C	G	0.2668	0.0193	0.0042	3.79e-06	3.59815e-05	21.1161
	MVPA	rs7678766	T	G	0.8286	0.0195	0.0042	3.51e-06	3.58874e-05	21.5561
	MVPA	rs2012741	A	C	0.606	0.0169	0.0032	1.7e-07	4.63452e-05	27.8915
	MVPA	rs9885024	A	G	0.3126	-0.016	0.0034	2.39e-06	3.66476e-05	22.1453
	MVPA	rs1363545	C	G	0.4941	-0.0152	0.0032	1.81e-06	3.74013e-05	22.5624
	MVPA	rs11951097	A	G	0.0497	0.0347	0.0074	2.73e-06	3.73146e-05	21.9884
	MVPA	rs2860884	T	C	0.48	-0.0198	0.0041	1.35e-06	4.8308e-05	23.3217
	MVPA	rs4865512	A	G	0.6124	0.024	0.0042	7.68e-09	6.74928e-05	32.6529
	MVPA	rs4352559	T	C	0.4964	0.018	0.0032	1.65e-08	5.2735e-05	31.6405
	MVPA	rs71604175	A	G	0.75	-0.0232	0.0047	8.18e-07	5.03641e-05	24.3657
	MVPA	rs62369123	A	G	0.7715	-0.0225	0.0048	3.47e-06	4.54178e-05	21.9726
	MVPA	rs149352	A	G	0.3421	-0.0166	0.0033	6.01e-07	4.20068e-05	25.3039
	MVPA	rs71561196	A	G	0.0961	0.0329	0.0069	2.01e-06	4.69933e-05	22.7348
	MVPA	rs13201721	T	C	0.7364	0.0255	0.004	1.83e-10	7.77606e-05	40.6405
	MVPA	rs370935521	T	C	0.0926	0.0434	0.0075	8.25e-09	7.45887e-05	33.4854
	MVPA	rs3095255	A	C	0.3502	0.0239	0.0044	5.55e-08	6.40354e-05	29.5045
	MVPA	rs71572536	T	C	0.2824	0.0225	0.0045	6.34e-07	5.1675e-05	24.9999
	MVPA	rs3799000	T	C	0.472	-0.0167	0.0032	1.15e-07	4.50707e-05	27.2353
	MVPA	rs4730073	A	C	0.6458	0.0167	0.0033	4.9e-07	4.23876e-05	25.6096
	MVPA	rs2074117	T	G	0.3522	0.0174	0.0033	1.97e-07	4.69186e-05	27.8016
	MVPA	rs10953742	T	C	0.3686	-0.019	0.0041	3.15e-06	4.0913e-05	21.4752
	MVPA	rs10269727	A	G	0.934	0.0293	0.0064	4.61e-06	3.53972e-05	20.9592
	MVPA	rs112591009	A	G	0.9663	-0.0622	0.013	1.61e-06	5.09942e-05	22.8924
	MVPA	rs564919	A	C	0.4448	0.0204	0.0041	6.81e-07	5.11721e-05	24.7566
	MVPA	rs11762545	T	C	0.1822	0.0263	0.0053	5.88e-07	5.0898e-05	24.624
	MVPA	rs10229245	A	G	0.2045	0.0252	0.0051	6.97e-07	5.04663e-05	24.4151
	MVPA	rs28722142	A	T	0.0535	-0.0436	0.0093	2.94e-06	4.54308e-05	21.9789
	MVPA	rs34974046	A	G	0.2992	0.0219	0.0044	8.5e-07	5.12063e-05	24.7731
	MVPA	rs9297664	T	G	0.1028	-0.0254	0.0053	1.44e-06	3.8278e-05	22.9675
	MVPA	rs75499504	A	G	0.9592	0.0554	0.0103	8.43e-08	5.99234e-05	28.9297
	MVPA	rs7822348	C	G	0.7349	-0.0179	0.0036	5.49e-07	4.11596e-05	24.7229
	MVPA	rs61180388	C	G	0.2682	0.021	0.0046	4.68e-06	4.30791e-05	20.8411
	MVPA	rs1421333	A	C	0.6025	0.0194	0.0041	2.92e-06	4.62784e-05	22.389
	MVPA	rs13262776	T	G	0.0567	-0.0355	0.0069	2.57e-07	4.3805e-05	26.4702
	MVPA	rs62499813	T	G	0.2508	0.024	0.005	1.87e-06	5.13226e-05	23.0399
	MVPA	rs4743347	T	C	0.692	0.0176	0.0034	2.77e-07	4.41559e-05	26.7958
	MVPA	rs10810155	C	G	0.5277	-0.0225	0.0042	1.02e-07	6.39274e-05	28.6989
	MVPA	rs12347361	C	G	0.6481	-0.0153	0.0033	3.09e-06	3.54226e-05	21.4958
	MVPA	rs72702046	A	T	0.049	-0.046	0.0094	1.14e-06	4.94996e-05	23.9474
	MVPA	rs7036107	A	G	0.4905	0.0196	0.0041	2.19e-06	4.73371e-05	22.853
	Sedentary commuting	rs76374890	T	C	0.0579	-0.0876	0.0172	3.31e-07	0.000207594	25.9385
	Sedentary commuting	rs35888745	T	C	0.6007	0.0392	0.0082	1.68e-06	0.000182902	22.8527
	Sedentary commuting	rs149246922	T	C	0.0267	0.1346	0.0266	4.08e-07	0.000204924	25.6047
	Sedentary commuting	rs308676	T	C	0.8626	-0.0577	0.0108	7.92e-08	0.000181718	28.5429
	Sedentary commuting	rs117992146	T	C	0.0585	-0.0799	0.0171	3.17e-06	0.000174735	21.832
	Sedentary commuting	rs112560164	A	G	0.1893	-0.0479	0.0102	2.8e-06	0.000176501	22.0528
	Sedentary commuting	rs2414010	A	G	0.9109	-0.0598	0.0129	3.56e-06	0.000136818	21.4891
	Sedentary commuting	rs13425445	C	G	0.9173	0.0639	0.0135	2.35e-06	0.000142642	22.4042
	Sedentary commuting	rs162064	T	G	0.356	-0.0353	0.0077	4.03e-06	0.000133809	21.0166
	Sedentary commuting	rs62280512	A	G	0.9548	0.0902	0.0196	4.08e-06	0.000169505	21.1784
	Sedentary commuting	rs144224971	T	C	0.9852	-0.1735	0.0375	3.67e-06	0.000173122	21.4057
	Sedentary commuting	rs1423299	A	T	0.0427	-0.0918	0.0187	9.42e-07	0.00015343	24.0989
	Sedentary commuting	rs73046678	A	C	0.1624	-0.0516	0.0109	2.11e-06	0.000179359	22.4099
	Sedentary commuting	rs16908418	T	C	0.0182	0.1262	0.0274	4.14e-06	0.000135634	21.2135
	Sedentary commuting	rs529761661	T	C	0.9914	0.2267	0.0485	2.93e-06	0.000199916	21.848
	smoking initiation	rs12025237	C	A	0.124	-0.0329992	0.00533915	6.52e-10	6.03627e-05	38.1998
	smoking initiation	rs116531886	G	A	0.0529	-0.0361889	0.0078047	3.47e-06	3.39747e-05	21.4999
	smoking initiation	rs12047884	G	T	0.515	-0.017601	0.00355593	7.53e-07	3.87154e-05	24.5
	smoking initiation	rs12042107	C	T	0.527	-0.0222834	0.0035682	4.22e-10	6.16268e-05	38.9999
	smoking initiation	rs2186122	T	A	0.561	0.0260573	0.00358602	3.61e-13	8.34314e-05	52.7998
	smoking initiation	rs7555507	T	C	0.496	-0.0241444	0.00355604	1.14e-11	7.28451e-05	46.0997
	smoking initiation	rs301805	G	T	0.559	0.0214679	0.00361329	2.8e-09	5.57804e-05	35.2998
	smoking initiation	rs77464064	T	C	0.0654	0.0389808	0.00723855	7.24e-08	4.58259e-05	28.9999
	smoking initiation	rs1533772	G	A	0.358	-0.0205592	0.00387152	1.11e-07	4.45617e-05	28.1999
	smoking initiation	rs10873871	G	A	0.191	0.0206879	0.00434214	1.9e-06	3.58709e-05	22.6999
	smoking initiation	rs4653083	C	T	0.656	0.0182823	0.00379566	1.43e-06	3.66609e-05	23.1999
	smoking initiation	rs3001723	A	G	0.321	0.0335118	0.0038983	8.12e-18	0.000116769	73.8999
	smoking initiation	rs56169608	A	G	0.45	0.0166955	0.0035676	2.82e-06	3.4607e-05	21.9001
	smoking initiation	rs2046850	T	C	0.187	-0.0248139	0.00447842	3.03e-08	4.85123e-05	30.7
	smoking initiation	rs41264285	T	C	0.195	0.0231133	0.00428466	6.76e-08	4.59836e-05	29.0998
	smoking initiation	rs4949463	T	C	0.141	0.026553	0.00545431	1.13e-06	3.7451e-05	23.6999
	smoking initiation	rs2050586	C	G	0.355	-0.0205467	0.00370828	3e-08	4.85121e-05	30.7
	smoking initiation	rs6669839	T	C	0.204	0.0260041	0.0043955	3.36e-09	5.53064e-05	34.9998
	smoking initiation	rs6691053	T	C	0.226	-0.0220229	0.00439579	5.38e-07	3.96634e-05	25.1
	smoking initiation	rs13030994	A	G	0.485	0.0360925	0.0035563	3.56e-24	0.000162742	103
	smoking initiation	rs6728726	C	T	0.829	0.0354486	0.00473279	6.73e-14	8.86456e-05	56.0999
	smoking initiation	rs6433897	C	T	0.754	0.0224483	0.00405809	3.16e-08	4.83543e-05	30.6001
	smoking initiation	rs4674993	G	A	0.207	-0.0252122	0.00443619	1.32e-08	5.10401e-05	32.2998
	smoking initiation	rs2710634	C	T	0.505	-0.0182303	0.00356158	3.07e-07	4.14015e-05	26.2
	smoking initiation	rs2678897	A	G	0.625	0.0200873	0.00364321	3.51e-08	4.80381e-05	30.4
	smoking initiation	rs7585579	G	C	0.505	0.0223996	0.0037281	1.88e-09	5.70444e-05	36.0997
	smoking initiation	rs266047	A	G	0.529	-0.0305098	0.00373855	3.36e-16	0.000105235	66.5995
	smoking initiation	rs3811038	C	T	0.272	0.0190094	0.00395515	1.58e-06	3.65029e-05	23.0999
	smoking initiation	rs11692232	A	C	0.0994	0.0260994	0.00568185	4.38e-06	3.33426e-05	21.0999
	smoking initiation	rs13007361	A	G	0.199	0.0223087	0.00445285	5.45e-07	3.96632e-05	25.0998
	smoking initiation	rs113746525	T	G	0.0257	-0.0573842	0.0114768	5.65e-07	3.95055e-05	25.0001
	smoking initiation	rs12714017	C	T	0.5	0.0194063	0.00372785	1.89e-07	4.28235e-05	27.0999
	smoking initiation	rs61533748	C	T	0.375	0.0190453	0.00365177	1.85e-07	4.29816e-05	27.1999
	smoking initiation	rs13391128	G	A	0.122	0.0279478	0.00533915	1.7e-07	4.32977e-05	27.3999
	smoking initiation	rs10179773	A	G	0.217	-0.0193798	0.00419912	3.89e-06	3.36589e-05	21.3001
	smoking initiation	rs12479064	T	C	0.218	0.0206378	0.00438013	2.46e-06	3.50808e-05	22.1999
	smoking initiation	rs4953977	T	C	0.367	-0.0183018	0.00385836	2.08e-06	3.55548e-05	22.4999
	smoking initiation	rs35702515	T	G	0.162	0.0252442	0.00423093	2.43e-09	5.62548e-05	35.6
	smoking initiation	rs1445649	C	T	0.525	0.0239932	0.00356484	1.68e-11	7.15809e-05	45.2997
	smoking initiation	rs12474587	T	G	0.404	0.0276329	0.00358234	1.25e-14	9.40179e-05	59.5001
	smoking initiation	rs2107300	G	C	0.845	-0.027201	0.00492533	3.27e-08	4.81959e-05	30.4998
	smoking initiation	rs13013954	C	A	0.2	-0.020192	0.00436487	3.78e-06	3.38169e-05	21.4
	smoking initiation	rs17016894	T	C	0.298	-0.0179113	0.0039179	4.76e-06	3.30267e-05	20.9
	smoking initiation	rs1406797	C	G	0.303	0.0187172	0.00398149	2.59e-06	3.49227e-05	22.0998
	smoking initiation	rs6788098	T	A	0.623	-0.0313461	0.00368905	1.91e-17	0.000114083	72.1999
	smoking initiation	rs66680800	T	G	0.397	-0.0202716	0.00365268	2.83e-08	4.86703e-05	30.8001
	smoking initiation	rs145151226	A	C	0.0278	0.0483049	0.0103221	2.92e-06	3.4607e-05	21.9
	smoking initiation	rs11926232	G	A	0.0485	0.0414517	0.0080071	2.21e-07	4.23495e-05	26.7999
	smoking initiation	rs74876138	C	T	0.234	0.0200365	0.00404798	7.42e-07	3.87153e-05	24.5
	smoking initiation	rs7631379	C	T	0.207	0.0218861	0.00440373	6.58e-07	3.90311e-05	24.6998
	smoking initiation	rs1485272	C	T	0.355	-0.0180134	0.00373982	1.48e-06	3.66612e-05	23.2
	smoking initiation	rs9880657	T	A	0.746	-0.0187875	0.00403311	3.25e-06	3.42906e-05	21.6998
	smoking initiation	rs10212466	T	G	0.398	-0.0171226	0.00362591	2.29e-06	3.52389e-05	22.3
	smoking initiation	rs12632110	G	A	0.647	-0.0233768	0.00375292	4.78e-10	6.13108e-05	38.7999
	smoking initiation	rs35887108	T	C	0.261	-0.0208958	0.00426534	9.74e-07	3.79251e-05	23.9999
	smoking initiation	rs6800583	A	G	0.363	0.0198416	0.00367815	6.73e-08	4.5984e-05	29.1
	smoking initiation	rs11712680	C	A	0.174	-0.0270476	0.00457843	3.51e-09	5.51483e-05	34.8998
	smoking initiation	rs1471093	A	G	0.597	0.0177443	0.00364489	1.1e-06	3.74511e-05	23.7
	smoking initiation	rs10934272	T	C	0.736	0.0190696	0.00412226	3.78e-06	3.38166e-05	21.3999
	smoking initiation	rs11716705	G	A	0.253	0.0197754	0.00410564	1.45e-06	3.66611e-05	23.2
	smoking initiation	rs1869243	C	T	0.481	0.0197411	0.00356289	2.97e-08	4.8512e-05	30.6999
	smoking initiation	rs2595255	T	G	0.395	-0.0174414	0.00361329	1.4e-06	3.68191e-05	23.3
	smoking initiation	rs1393450	G	T	0.221	0.0198448	0.00423093	2.71e-06	3.47647e-05	21.9999
	smoking initiation	rs1714521	C	A	0.402	-0.0195104	0.00360439	6.33e-08	4.63e-05	29.3
	smoking initiation	rs2196356	C	G	0.274	-0.0196568	0.00395515	6.74e-07	3.90315e-05	24.7001
	smoking initiation	rs1154693	G	A	0.856	0.0326217	0.00491232	3.12e-11	6.96854e-05	44.1
	smoking initiation	rs10446671	T	C	0.482	0.0165296	0.00355661	3.28e-06	3.41326e-05	21.5999
	smoking initiation	rs10001365	A	G	0.405	-0.0249918	0.00364155	6.65e-12	7.44256e-05	47.1
	smoking initiation	rs11941714	A	G	0.337	-0.0192414	0.00378083	3.64e-07	4.09273e-05	25.8999
	smoking initiation	rs993700	C	T	0.766	-0.025928	0.00429163	1.53e-09	5.76767e-05	36.4999
	smoking initiation	rs3934797	A	G	0.17	-0.024258	0.00461742	1.53e-07	4.36139e-05	27.6
	smoking initiation	rs62340589	C	G	0.192	0.0207401	0.0043724	2.09e-06	3.55548e-05	22.4999
	smoking initiation	rs1160685	G	C	0.478	0.0207724	0.00358893	7.2e-09	5.29362e-05	33.4998
	smoking initiation	rs962625	G	A	0.24	0.0237181	0.00403803	4.37e-09	5.45167e-05	34.5
	smoking initiation	rs71600499	C	G	0.276	-0.0182039	0.00392595	3.63e-06	3.39748e-05	21.5
	smoking initiation	rs75522131	A	G	0.144	-0.027182	0.00540408	4.81e-07	3.99792e-05	25.2998
	smoking initiation	rs13145728	C	G	0.358	-0.0232512	0.00366263	2.14e-10	6.36809e-05	40.2998
	smoking initiation	rs1621770	T	A	0.099	-0.0309353	0.00636793	1.22e-06	3.72931e-05	23.5999
	smoking initiation	rs4044321	G	A	0.642	-0.0278417	0.00371058	6.08e-14	8.89614e-05	56.2998
	smoking initiation	rs72789632	T	C	0.12	-0.0328856	0.00528628	5.02e-10	6.11529e-05	38.6999
	smoking initiation	rs1385108	T	C	0.239	0.0246617	0.00415673	3e-09	5.56225e-05	35.1999
	smoking initiation	rs10062607	A	C	0.615	0.0175049	0.00365002	1.61e-06	3.6345e-05	23
	smoking initiation	rs1921087	C	A	0.502	0.0194091	0.0035735	5.62e-08	4.6616e-05	29.5
	smoking initiation	rs6893752	G	A	0.766	-0.0240995	0.00407356	3.25e-09	5.53065e-05	34.9999
	smoking initiation	rs2173019	A	T	0.191	0.0240401	0.00467881	2.76e-07	4.17173e-05	26.3998
	smoking initiation	rs888817	A	G	0.63	0.0182838	0.00368637	6.96e-07	3.88732e-05	24.5999
	smoking initiation	rs17165769	G	A	0.389	0.0170421	0.00365002	3.08e-06	3.44487e-05	21.7999
	smoking initiation	rs7717387	T	C	0.953	-0.0449969	0.00907226	6.97e-07	3.88731e-05	24.5999
	smoking initiation	rs4518351	G	A	0.428	0.0174272	0.00357975	1.12e-06	3.74512e-05	23.7
	smoking initiation	rs12186738	T	G	0.154	-0.0332644	0.00502051	3.42e-11	6.9369e-05	43.8998
	smoking initiation	rs4352629	T	C	0.492	-0.0275284	0.00356881	1.22e-14	9.4017e-05	59.4996
	smoking initiation	rs71627577	G	A	0.102	-0.0302	0.00563723	8.59e-08	4.53518e-05	28.6999
	smoking initiation	rs9401770	A	G	0.273	0.0277307	0.003986	3.47e-12	7.64797e-05	48.4
	smoking initiation	rs11756490	A	T	0.114	-0.0265895	0.00528628	4.84e-07	3.99793e-05	25.2999
	smoking initiation	rs9471935	A	G	0.232	0.0202521	0.00425066	1.91e-06	3.5871e-05	22.7
	smoking initiation	rs222449	T	A	0.793	-0.0253208	0.00442796	1.08e-08	5.16722e-05	32.6999
	smoking initiation	rs79222572	G	T	0.251	0.0194921	0.00410018	2.04e-06	3.57131e-05	22.6001
	smoking initiation	rs3800227	G	A	0.701	0.0228121	0.00405809	1.93e-08	4.99341e-05	31.5999
	smoking initiation	rs10498846	T	C	0.473	0.0206103	0.00355561	6.62e-09	5.30945e-05	33.6
	smoking initiation	rs10698713	A	G	0.0545	-0.0425497	0.00794247	8.29e-08	4.53518e-05	28.6999
	smoking initiation	rs9388686	C	A	0.815	0.0234534	0.00470008	6.14e-07	3.93474e-05	24.9
	smoking initiation	rs644400	A	G	0.433	0.0164653	0.00359303	4.51e-06	3.31845e-05	20.9999
	smoking initiation	rs4714071	T	C	0.511	-0.0176442	0.00355741	6.95e-07	3.88733e-05	24.6
	smoking initiation	rs499606	T	C	0.107	0.0344674	0.0075214	4.55e-06	3.31847e-05	21
	smoking initiation	rs4713121	C	T	0.231	-0.0220498	0.0041596	1.17e-07	4.44037e-05	28.0999
	smoking initiation	rs6914489	T	C	0.74	0.0203918	0.00409477	6.5e-07	3.91893e-05	24.7999
	smoking initiation	rs240963	C	T	0.836	-0.0410444	0.00483712	2.16e-17	0.000113767	72
	smoking initiation	rs16896316	G	A	0.192	0.0220576	0.00455013	1.24e-06	3.71351e-05	23.5
	smoking initiation	rs2074118	G	A	0.7	-0.0201092	0.00403803	6.22e-07	3.91891e-05	24.7999
	smoking initiation	rs10260968	A	G	0.597	-0.0203218	0.00360938	1.75e-08	5.00921e-05	31.6999
	smoking initiation	rs12671250	G	C	0.559	0.0166953	0.00357573	2.99e-06	3.4449e-05	21.8001
	smoking initiation	rs13246563	G	C	0.526	-0.0234631	0.00373798	3.45e-10	6.2259e-05	39.3999
	smoking initiation	rs2072155	C	T	0.697	0.0194546	0.00388317	5.47e-07	3.96631e-05	25.0998
	smoking initiation	rs12333760	C	T	0.204	-0.0290467	0.00480127	1.44e-09	5.78347e-05	36.5999
	smoking initiation	rs4236259	G	T	0.499	-0.0247689	0.00355661	3.35e-12	7.66372e-05	48.4998
	smoking initiation	rs6974377	C	T	0.316	0.0201385	0.00386851	1.91e-07	4.28233e-05	27.0998
	smoking initiation	rs10233018	G	A	0.503	0.027069	0.00355741	2.75e-14	9.1489e-05	57.8996
	smoking initiation	rs6956116	A	G	0.338	0.0172146	0.00374762	4.4e-06	3.33427e-05	21.0999
	smoking initiation	rs2622167	A	G	0.416	0.0170914	0.00360318	2.15e-06	3.5555e-05	22.5
	smoking initiation	rs12112638	G	A	0.275	-0.024526	0.00404299	1.34e-09	5.81507e-05	36.7999
	smoking initiation	rs3801289	C	A	0.351	-0.0220618	0.00373982	3.74e-09	5.49906e-05	34.8
	smoking initiation	rs10953957	A	G	0.392	0.0184591	0.00366263	4.72e-07	4.01374e-05	25.4
	smoking initiation	rs10279261	A	G	0.619	-0.0214194	0.00366263	5e-09	5.40427e-05	34.2001
	smoking initiation	rs13250170	G	A	0.231	-0.0217083	0.00425735	3.5e-07	4.10854e-05	25.9999
	smoking initiation	rs1899896	T	C	0.286	0.0264481	0.00388691	1.04e-11	7.31611e-05	46.2997
	smoking initiation	rs2631024	G	A	0.737	-0.0229645	0.00402823	1.18e-08	5.13565e-05	32.5001
	smoking initiation	rs4841484	A	G	0.286	-0.0198824	0.00384062	2.31e-07	4.23495e-05	26.7999
	smoking initiation	rs12545053	G	A	0.397	0.0202808	0.00363668	2.43e-08	4.9144e-05	31.0999
	smoking initiation	rs13261666	T	G	0.522	-0.0268946	0.00355604	3.9e-14	9.03836e-05	57.1999
	smoking initiation	rs1565735	A	T	0.212	-0.037618	0.0044613	3.42e-17	0.000112345	71.0996
	smoking initiation	rs7026534	G	T	0.689	-0.0202166	0.00389068	1.99e-07	4.26657e-05	27
	smoking initiation	rs10119117	T	C	0.51	0.0170171	0.00355604	1.72e-06	3.61871e-05	22.9001
	smoking initiation	rs41274959	A	G	0.0331	-0.0479823	0.00921714	1.93e-07	4.28236e-05	27.0999
	smoking initiation	rs2378662	A	G	0.556	0.0209482	0.00356645	4.16e-09	5.45167e-05	34.5001
	smoking initiation	rs4837631	T	C	0.436	-0.018077	0.00357278	4.1e-07	4.04534e-05	25.5999
	smoking initiation	rs4543592	C	T	0.468	0.0219314	0.00356244	7.46e-10	5.98885e-05	37.8997
	smoking initiation	rs1392510	C	T	0.148	0.0275563	0.00510828	6.84e-08	4.59838e-05	29.0999
	smoking initiation	rs10114490	A	G	0.198	-0.0255148	0.00453171	1.81e-08	5.00922e-05	31.7
	smoking initiation	rs10819050	T	G	0.423	0.0198368	0.00378963	1.64e-07	4.32975e-05	27.3999
	smoking initiation	rs73654326	T	A	0.287	-0.0183579	0.00391392	2.79e-06	3.47648e-05	21.9999
	smoking initiation	rs10968592	C	T	0.0773	0.0308102	0.00662931	3.34e-06	3.41326e-05	21.5999
	smoking initiation	rs12356821	C	G	0.14	0.03937	0.0050491	6.27e-15	9.60712e-05	60.7997
	smoking initiation	rs7902527	A	G	0.227	0.0207731	0.00420538	7.86e-07	3.85574e-05	24.4001
	smoking initiation	rs7921378	C	G	0.463	-0.0254601	0.00355815	8.26e-13	8.09038e-05	51.2
	smoking initiation	rs9423279	G	C	0.641	-0.0205132	0.00370828	3.21e-08	4.83541e-05	30.5999
	smoking initiation	rs147662818	T	C	0.00896	0.102393	0.0190139	7.25e-08	4.58258e-05	28.9999
	smoking initiation	rs10997380	T	C	0.798	-0.0195405	0.00426409	4.59e-06	3.31846e-05	20.9999
	smoking initiation	rs1414909	A	G	0.378	0.0178587	0.00367615	1.19e-06	3.72932e-05	23.6
	smoking initiation	rs10905461	C	T	0.718	-0.0239554	0.00414505	7.35e-09	5.27784e-05	33.4
	smoking initiation	rs11256434	C	T	0.403	-0.0171788	0.00360561	1.85e-06	3.58711e-05	22.7
	smoking initiation	rs72802545	C	A	0.174	-0.0223496	0.00473279	2.35e-06	3.52389e-05	22.2999
	smoking initiation	rs1776631	C	T	0.796	-0.0205597	0.00430576	1.78e-06	3.60289e-05	22.7999
	smoking initiation	rs7929518	G	A	0.765	0.0242377	0.00428466	1.56e-08	5.05662e-05	31.9999
	smoking initiation	rs78648167	G	A	0.083	-0.029075	0.0062851	3.65e-06	3.38168e-05	21.4
	smoking initiation	rs694739	G	A	0.363	-0.0186652	0.00365353	3.27e-07	4.12434e-05	26.0999
	smoking initiation	rs480939	A	G	0.561	-0.0187591	0.00357073	1.48e-07	4.36137e-05	27.6
	smoking initiation	rs1834306	G	A	0.576	-0.0164836	0.00360561	4.83e-06	3.30266e-05	20.9
	smoking initiation	rs2958853	A	G	0.475	-0.0177254	0.00355935	6.4e-07	3.91891e-05	24.7999
	smoking initiation	rs568599	C	G	0.523	0.019049	0.0035682	9.46e-08	4.50359e-05	28.5
	smoking initiation	rs7938812	G	T	0.424	0.0437914	0.00363668	2.71e-33	0.000229087	144.999
	smoking initiation	rs4433590	A	G	0.831	-0.0225823	0.00466833	1.34e-06	3.69768e-05	23.3998
	smoking initiation	rs2959100	G	C	0.461	-0.018687	0.0035765	1.75e-07	4.31396e-05	27.2999
	smoking initiation	rs4523689	G	A	0.408	-0.0206091	0.00364321	1.55e-08	5.05661e-05	31.9999
	smoking initiation	rs2010921	A	G	0.305	0.0187361	0.00384053	1.07e-06	3.7609e-05	23.7999
	smoking initiation	rs1971318	T	C	0.141	0.0285074	0.00492533	7.06e-09	5.29363e-05	33.4999
	smoking initiation	rs324768	G	A	0.363	-0.0181209	0.00365353	6.92e-07	3.88731e-05	24.5999
	smoking initiation	rs11611651	A	G	0.0781	0.0339402	0.00632439	8.02e-08	4.55097e-05	28.7998
	smoking initiation	rs11610032	C	T	0.205	-0.021896	0.00427774	3.08e-07	4.14014e-05	26.1999
	smoking initiation	rs11057005	G	A	0.43	-0.0209298	0.00357892	4.85e-09	5.40424e-05	34.1999
	smoking initiation	rs7969559	G	A	0.688	-0.0243756	0.00395946	7.31e-10	5.98887e-05	37.8998
	smoking initiation	rs7999164	A	G	0.549	0.0174641	0.00356484	9.5e-07	3.79252e-05	24
	smoking initiation	rs9540729	T	A	0.501	-0.0195522	0.00355789	3.82e-08	4.77219e-05	30.1999
	smoking initiation	rs3904512	A	G	0.429	-0.0211589	0.0035765	3.23e-09	5.53067e-05	35
	smoking initiation	rs10507911	T	G	0.229	-0.0211645	0.00422447	5.53e-07	3.96631e-05	25.0998
	smoking initiation	rs61959481	A	G	0.207	-0.022643	0.00434961	1.91e-07	4.28234e-05	27.0998
	smoking initiation	rs7322872	T	C	0.782	-0.0255713	0.00433474	3.58e-09	5.49905e-05	34.7999
	smoking initiation	rs9603051	G	A	0.513	0.0169818	0.00355645	1.78e-06	3.60289e-05	22.7999
	smoking initiation	rs10130576	A	G	0.389	0.0189512	0.00370243	3.16e-07	4.14013e-05	26.1998
	smoking initiation	rs34940743	G	A	0.336	0.0194652	0.00375304	2.15e-07	4.25074e-05	26.8999
	smoking initiation	rs8010469	G	A	0.54	-0.0176732	0.00357052	7.56e-07	3.87153e-05	24.5
	smoking initiation	rs77803288	T	C	0.0461	-0.0384805	0.00813048	2.24e-06	3.53969e-05	22.4
	smoking initiation	rs76214862	C	A	0.202	-0.0249903	0.00454745	3.99e-08	4.7722e-05	30.1999
	smoking initiation	rs8018617	C	A	0.384	0.0198616	0.00367556	6.58e-08	4.61417e-05	29.1998
	smoking initiation	rs2286664	A	G	0.728	0.019239	0.00403803	1.92e-06	3.58709e-05	22.6999
	smoking initiation	rs72730742	C	A	0.0898	-0.0308683	0.006089	3.89e-07	4.06114e-05	25.6999
	smoking initiation	rs1435741	A	G	0.425	0.0294151	0.00359095	2.64e-16	0.000106025	67.0997
	smoking initiation	rs77075313	G	A	0.0447	-0.0428693	0.00869648	8.15e-07	3.83991e-05	24.2999
	smoking initiation	rs12441907	A	C	0.186	-0.0292051	0.00452262	1.06e-10	6.58932e-05	41.7
	smoking initiation	rs55958435	G	A	0.24	-0.0212333	0.0040788	1.92e-07	4.28237e-05	27.1
	smoking initiation	rs8027457	C	T	0.524	0.0188207	0.00355679	1.2e-07	4.42454e-05	27.9997
	smoking initiation	rs4781977	C	T	0.205	-0.0238668	0.00436473	4.54e-08	4.72482e-05	29.9001
	smoking initiation	rs55968130	A	C	0.0899	0.0299675	0.00589984	3.88e-07	4.07695e-05	25.8
	smoking initiation	rs1050847	T	C	0.505	-0.0216231	0.00358893	1.67e-09	5.73605e-05	36.2998
	smoking initiation	rs2917666	G	C	0.661	-0.0189735	0.00386491	9.04e-07	3.80831e-05	24.0999
	smoking initiation	rs114900182	G	C	0.0642	-0.0337264	0.00665279	3.93e-07	4.06113e-05	25.6999
	smoking initiation	rs11076967	T	G	0.289	0.0205027	0.00414217	7.34e-07	3.87152e-05	24.4999
	smoking initiation	rs2547030	A	G	0.639	0.0172104	0.00375561	4.71e-06	3.31848e-05	21
	smoking initiation	rs7197072	T	C	0.238	-0.0247672	0.0041686	2.77e-09	5.57804e-05	35.2998
	smoking initiation	rs4785187	A	G	0.229	0.0201944	0.00425735	2.06e-06	3.55549e-05	22.5
	smoking initiation	rs4785836	C	T	0.398	-0.0204704	0.00365894	2.26e-08	4.94598e-05	31.2997
	smoking initiation	rs745570	G	A	0.511	-0.0177466	0.00355645	5.99e-07	3.9347e-05	24.8998
	smoking initiation	rs62074192	A	G	0.511	-0.0162561	0.00355584	4.95e-06	3.30268e-05	20.9
	smoking initiation	rs17692129	T	C	0.321	0.019816	0.00375832	1.32e-07	4.39296e-05	27.7999
	smoking initiation	rs11078713	G	A	0.454	-0.0201721	0.00360561	2.23e-08	4.94601e-05	31.2999
	smoking initiation	rs11658881	G	A	0.418	0.0201357	0.00361066	2.43e-08	4.91441e-05	31.0999
	smoking initiation	rs7224742	T	C	0.595	-0.0207099	0.00365532	1.43e-08	5.07242e-05	32.0999
	smoking initiation	rs11872397	A	G	0.252	-0.0247725	0.00409477	1.43e-09	5.78346e-05	36.5998
	smoking initiation	rs6508144	G	C	0.563	-0.0206935	0.00358602	7.97e-09	5.26201e-05	33.2998
	smoking initiation	rs3213876	C	T	0.301	0.0193212	0.00373222	2.24e-07	4.23494e-05	26.7998
	smoking initiation	rs2551456	A	C	0.451	0.0179262	0.0035781	5.5e-07	3.96631e-05	25.0998
	smoking initiation	rs2960029	A	G	0.238	0.0198285	0.00411667	1.49e-06	3.6661e-05	23.1999
	smoking initiation	rs501796	A	G	0.517	0.0165678	0.00355661	3.13e-06	3.42906e-05	21.6998
	smoking initiation	rs72976160	A	G	0.166	0.0227039	0.00446982	3.87e-07	4.07695e-05	25.8
	smoking initiation	rs628891	T	C	0.302	-0.0194696	0.00384053	3.92e-07	4.06112e-05	25.6998
	smoking initiation	rs72896886	C	G	0.144	-0.0268885	0.00483712	2.75e-08	4.88282e-05	30.9
	smoking initiation	rs7505855	T	C	0.596	-0.0189689	0.00361066	1.45e-07	4.36138e-05	27.6
	smoking initiation	rs16975171	A	C	0.0818	-0.0315762	0.00671682	2.61e-06	3.49228e-05	22.0999
	smoking initiation	rs1126757	T	C	0.469	0.0186993	0.00355935	1.53e-07	4.36137e-05	27.5999
	smoking initiation	rs76608582	A	C	0.0389	-0.0495575	0.00825958	1.94e-09	5.68866e-05	35.9999
	smoking initiation	rs1555445	T	A	0.337	0.0225548	0.0038234	3.65e-09	5.49904e-05	34.7998
	smoking initiation	rs1569916	T	C	0.561	-0.0196148	0.0035992	5.13e-08	4.69318e-05	29.6999
	smoking initiation	rs117143374	C	T	0.12	0.0292897	0.00526909	2.76e-08	4.88281e-05	30.8999
	smoking initiation	rs2835985	G	C	0.506	0.0167207	0.00355679	2.55e-06	3.49228e-05	22.0999
	smoking initiation	rs9627272	C	G	0.416	-0.0191417	0.00363042	1.37e-07	4.39299e-05	27.8001
	smoking initiation	rs4822102	T	C	0.613	-0.0184609	0.00364155	3.97e-07	4.06114e-05	25.6999
	smoking initiation	rs134529	C	T	0.349	-0.019984	0.00366078	4.85e-08	4.70901e-05	29.8
	Alcoholic drinks per week	rs823152	A	G	0.416	0.00970941	0.00195364	6.72e-07	4.6881e-05	24.6999
	Alcoholic drinks per week	rs61836129	C	T	0.0123	-0.044221	0.00910276	1.2e-06	4.87343e-05	23.5998
	Alcoholic drinks per week	rs7547690	C	T	0.702	-0.0112704	0.00207506	5.55e-08	5.58284e-05	29.4996
	Alcoholic drinks per week	rs28680958	A	G	0.23	-0.0135848	0.0023684	9.78e-09	6.18335e-05	32.8999
	Alcoholic drinks per week	rs34305371	A	G	0.0858	-0.0166465	0.00327727	3.81e-07	5.0405e-05	25.8
	Alcoholic drinks per week	rs79072804	G	A	0.0128	0.036828	0.00792412	3.4e-06	4.20549e-05	21.5999
	Alcoholic drinks per week	rs58107686	A	C	0.344	-0.0113648	0.00213632	1.06e-07	5.68632e-05	28.3002
	Alcoholic drinks per week	rs2854459	C	T	0.795	0.0110475	0.00239373	4.03e-06	4.24788e-05	21.2998
	Alcoholic drinks per week	rs1416706	A	G	0.672	0.00991879	0.00205046	1.31e-06	4.44036e-05	23.3999
	Alcoholic drinks per week	rs2972140	C	T	0.654	-0.00945897	0.00201209	2.61e-06	4.12244e-05	22.0999
	Alcoholic drinks per week	rs13024996	A	C	0.352	-0.0120123	0.00200483	2.08e-09	6.74468e-05	35.9001
	Alcoholic drinks per week	rs75750180	T	G	0.0927	-0.0153603	0.00328981	3.05e-06	4.23743e-05	21.8
	Alcoholic drinks per week	rs62135521	T	G	0.0378	-0.0263576	0.00459523	9.91e-09	6.3664e-05	32.9
	Alcoholic drinks per week	rs1377491	T	A	0.807	0.0116604	0.00238513	1.03e-06	4.45966e-05	23.9002
	Alcoholic drinks per week	rs72857537	C	T	0.0386	0.0231528	0.00506443	4.92e-06	4.09771e-05	20.8999
	Alcoholic drinks per week	rs4664531	C	T	0.278	-0.010133	0.00217024	2.99e-06	4.08454e-05	21.8001
	Alcoholic drinks per week	rs10184268	T	C	0.239	0.011449	0.00228524	5.39e-07	4.69547e-05	25.0998
	Alcoholic drinks per week	rs6739804	C	T	0.66	-0.0129688	0.00208202	4.72e-10	7.2899e-05	38.7997
	Alcoholic drinks per week	rs1260326	C	T	0.595	0.023812	0.00198433	3.33e-33	0.000270432	144
	Alcoholic drinks per week	rs56337305	C	T	0.375	-0.0100842	0.00198532	3.84e-07	4.90968e-05	25.8
	Alcoholic drinks per week	rs78876991	C	T	0.0589	-0.0206865	0.00404918	3.3e-07	4.97013e-05	26.0999
	Alcoholic drinks per week	rs9809760	C	T	0.47	0.00920562	0.00193642	2.01e-06	4.24671e-05	22.5998
	Alcoholic drinks per week	rs7618629	G	A	0.772	0.0105857	0.0022218	1.86e-06	4.36903e-05	22.7001
	Alcoholic drinks per week	rs28732378	G	A	0.729	-0.0167274	0.00219076	2.24e-14	0.000109986	58.2996
	Alcoholic drinks per week	rs6787172	G	T	0.546	-0.0105497	0.00194235	5.49e-08	5.5362e-05	29.5001
	Alcoholic drinks per week	rs60026303	G	A	0.187	0.0112891	0.00243468	3.52e-06	4.03109e-05	21.4997
	Alcoholic drinks per week	rs79373562	A	G	0.0235	-0.0291268	0.00583704	6.01e-07	4.82749e-05	24.9
	Alcoholic drinks per week	rs6809836	A	G	0.294	-0.0104792	0.0021302	8.64e-07	4.55884e-05	24.1999
	Alcoholic drinks per week	rs331939	A	G	0.339	-0.0119016	0.00202921	4.5e-09	6.4091e-05	34.3997
	Alcoholic drinks per week	rs1229984	C	T	0.953	0.188115	0.00617852	1e-200	0.00179815	926.993
	Alcoholic drinks per week	rs78234152	A	G	0.0986	0.0276538	0.00307075	2.18e-19	0.000151828	81.0997
	Alcoholic drinks per week	rs12646808	C	T	0.338	-0.0105646	0.00204073	2.27e-07	5.24294e-05	26.7999
	Alcoholic drinks per week	rs28712821	A	G	0.594	0.0283339	0.00197411	1.1e-46	0.00039177	206.001
	Alcoholic drinks per week	rs16854020	A	G	0.127	0.018083	0.0029068	4.82e-10	7.25344e-05	38.6998
	Alcoholic drinks per week	rs28694391	C	T	0.804	-0.0132525	0.00250003	1.12e-07	5.3026e-05	28.0998
	Alcoholic drinks per week	rs13124335	C	T	0.174	0.0122151	0.00259251	2.41e-06	4.33483e-05	22.1999
	Alcoholic drinks per week	rs2074378	T	C	0.341	-0.0100838	0.00207134	1.14e-06	4.46927e-05	23.6998
	Alcoholic drinks per week	rs7661710	G	A	0.487	0.00923443	0.00193819	1.85e-06	4.29127e-05	22.7
	Alcoholic drinks per week	rs1383346	A	G	0.462	-0.00903796	0.00194017	3.27e-06	4.09666e-05	21.7
	Alcoholic drinks per week	rs12513758	G	C	0.161	-0.0138539	0.00268616	2.54e-07	5.35257e-05	26.5998
	Alcoholic drinks per week	rs2545799	G	T	0.508	0.00894924	0.00193455	3.65e-06	4.25681e-05	21.3998
	Alcoholic drinks per week	rs13179781	G	A	0.573	-0.00890009	0.0019468	4.85e-06	3.93346e-05	20.8999
	Alcoholic drinks per week	rs2194027	A	T	0.453	-0.0104304	0.00193023	6.54e-08	5.53916e-05	29.2
	Alcoholic drinks per week	rs4501371	A	T	0.521	-0.010254	0.00193782	1.2e-07	5.27521e-05	28
	Alcoholic drinks per week	rs10513154	C	T	0.267	0.0116134	0.00218307	1.04e-07	5.29355e-05	28.2997
	Alcoholic drinks per week	rs55786063	T	G	0.469	-0.0093399	0.00193079	1.35e-06	4.40679e-05	23.3998
	Alcoholic drinks per week	rs4481304	A	G	0.437	-0.00917236	0.00194235	2.37e-06	4.22595e-05	22.3
	Alcoholic drinks per week	rs55872084	T	G	0.218	0.0127314	0.0022684	1.98e-08	5.94679e-05	31.5001
	Alcoholic drinks per week	rs1906252	A	C	0.466	0.00888745	0.00193023	4.22e-06	3.98716e-05	21.1999
	Alcoholic drinks per week	rs911475	T	C	0.153	-0.0126417	0.0026246	1.47e-06	4.42426e-05	23.1997
	Alcoholic drinks per week	rs9349379	G	A	0.399	0.00896963	0.00196201	4.9e-06	3.96934e-05	20.8999
	Alcoholic drinks per week	rs10085696	G	A	0.201	-0.0160517	0.00249471	1.24e-10	7.73694e-05	41.4
	Alcoholic drinks per week	rs11238438	C	G	0.408	0.00917871	0.00193936	2.26e-06	4.19304e-05	22.3998
	Alcoholic drinks per week	rs78697684	A	G	0.0166	-0.0330172	0.0068401	1.41e-06	4.41393e-05	23.2999
	Alcoholic drinks per week	rs6962879	G	C	0.599	0.00955761	0.0019674	1.19e-06	4.51352e-05	23.6
	Alcoholic drinks per week	rs2299409	A	G	0.493	-0.0105546	0.00193346	4.8e-08	5.57757e-05	29.7997
	Alcoholic drinks per week	rs10236149	G	A	0.17	-0.0157896	0.00294734	8.65e-08	5.39761e-05	28.6999
	Alcoholic drinks per week	rs6969458	A	G	0.459	0.0127063	0.00193545	5.2e-11	8.45608e-05	43.0995
	Alcoholic drinks per week	rs800578	C	T	0.789	0.0116376	0.00231367	4.95e-07	4.81427e-05	25.3001
	Alcoholic drinks per week	rs28601761	G	C	0.405	0.0112989	0.00195507	7.6e-09	6.38542e-05	33.4
	Alcoholic drinks per week	rs9297173	T	A	0.5	0.00882196	0.00192971	4.82e-06	3.9265e-05	20.8999
	Alcoholic drinks per week	rs13254315	A	G	0.146	0.0123797	0.00270148	4.64e-06	3.93225e-05	20.9998
	Alcoholic drinks per week	rs10105127	C	T	0.666	0.00937746	0.0020224	3.48e-06	4.11099e-05	21.4998
	Alcoholic drinks per week	rs4380889	A	G	0.422	-0.0100702	0.00195253	2.46e-07	4.99265e-05	26.5998
	Alcoholic drinks per week	rs10097299	G	T	0.194	-0.0121369	0.00238944	3.84e-07	4.86441e-05	25.8001
	Alcoholic drinks per week	rs2724988	T	G	0.598	0.00935147	0.00198474	2.48e-06	4.25439e-05	22.1999
	Alcoholic drinks per week	rs55932213	G	A	0.701	0.0124767	0.002216	1.8e-08	6.14357e-05	31.6999
	Alcoholic drinks per week	rs13288470	T	A	0.119	-0.0159323	0.00297917	9.06e-08	5.42064e-05	28.5999
	Alcoholic drinks per week	rs138068171	T	C	0.0396	-0.028312	0.0055312	3.08e-07	5.00909e-05	26.2
	Alcoholic drinks per week	rs4743005	A	G	0.184	-0.0130992	0.00251628	1.94e-07	5.07473e-05	27.1
	Alcoholic drinks per week	rs10512093	G	A	0.484	0.0094747	0.00193	9e-07	4.55886e-05	24.0999
	Alcoholic drinks per week	rs7043551	C	T	0.49	0.0101448	0.00193455	1.59e-07	5.37081e-05	27.4995
	Alcoholic drinks per week	rs10996513	A	C	0.0469	0.0209675	0.00443019	2.26e-06	4.31392e-05	22.3999
	Alcoholic drinks per week	rs72825968	C	T	0.0608	-0.0197757	0.00368498	8.15e-08	5.51832e-05	28.8
	Alcoholic drinks per week	rs77232328	T	C	0.0527	0.0215083	0.00399399	7.42e-08	5.44552e-05	28.9999
	Alcoholic drinks per week	rs4309187	C	A	0.697	0.0147908	0.00208756	1.37e-12	9.45188e-05	50.2
	Alcoholic drinks per week	rs4752999	T	C	0.321	-0.0145643	0.00207008	2.03e-12	9.3497e-05	49.4998
	Alcoholic drinks per week	rs11231299	A	G	0.193	0.0117546	0.00242997	1.29e-06	4.37927e-05	23.3998
	Alcoholic drinks per week	rs17542254	G	A	0.251	0.0131418	0.00214605	8.96e-10	7.02348e-05	37.4998
	Alcoholic drinks per week	rs1609028	C	G	0.597	0.010038	0.00201975	6.79e-07	4.66285e-05	24.7
	Alcoholic drinks per week	rs55863153	C	A	0.0202	0.0279602	0.00576775	1.23e-06	4.60199e-05	23.4999
	Alcoholic drinks per week	rs2336448	T	C	0.418	-0.0103155	0.00197068	1.62e-07	5.14934e-05	27.3998
	Alcoholic drinks per week	rs1387766	A	G	0.622	-0.010827	0.00198336	4.79e-08	5.56905e-05	29.7997
	Alcoholic drinks per week	rs11108953	G	A	0.248	-0.0105858	0.00218835	1.32e-06	4.42018e-05	23.3998
	Alcoholic drinks per week	rs61934664	A	G	0.476	-0.0104079	0.00192938	6.94e-08	5.4482e-05	29.0997
	Alcoholic drinks per week	rs61931384	C	T	0.275	-0.0103509	0.00215831	1.63e-06	4.73196e-05	22.9999
	Alcoholic drinks per week	rs4772260	C	T	0.428	0.00912625	0.00195913	3.27e-06	4.13734e-05	21.6998
	Alcoholic drinks per week	rs1927847	C	T	0.378	-0.00916724	0.00198632	3.95e-06	4.2697e-05	21.2999
	Alcoholic drinks per week	rs943724	A	G	0.751	0.0105768	0.00223977	2.36e-06	4.22334e-05	22.2998
	Alcoholic drinks per week	rs4600355	T	C	0.562	-0.0100507	0.00195983	2.99e-07	4.93479e-05	26.2999
	Alcoholic drinks per week	rs149591881	A	G	0.334	0.00981845	0.00205625	1.78e-06	4.27529e-05	22.7999
	Alcoholic drinks per week	rs962961	T	C	0.329	-0.0121885	0.00205146	2.78e-09	6.61187e-05	35.2998
	Alcoholic drinks per week	rs1190979	C	A	0.14	-0.0147464	0.00279681	1.36e-07	5.26335e-05	27.8
	Alcoholic drinks per week	rs28929474	T	C	0.0154	-0.0476809	0.00713966	2.39e-11	8.43936e-05	44.5997
	Alcoholic drinks per week	rs35807116	T	C	0.562	0.0102822	0.00197153	1.85e-07	5.11461e-05	27.1997
	Alcoholic drinks per week	rs28616142	T	C	0.402	0.0104275	0.0019777	1.37e-07	5.25391e-05	27.7996
	Alcoholic drinks per week	rs2414133	G	A	0.309	0.0105974	0.00212801	6.21e-07	4.67288e-05	24.7999
	Alcoholic drinks per week	rs11860773	C	T	0.176	-0.0150051	0.00244381	8.35e-10	7.31389e-05	37.7
	Alcoholic drinks per week	rs13332432	G	C	0.296	0.014005	0.00214072	5.94e-11	8.27876e-05	42.8001
	Alcoholic drinks per week	rs62044525	G	C	0.172	-0.0125707	0.00249919	4.97e-07	4.77339e-05	25.2999
	Alcoholic drinks per week	rs78815775	G	A	0.0399	-0.0206147	0.00431728	1.83e-06	4.32434e-05	22.7998
	Alcoholic drinks per week	rs79616692	C	G	0.11	0.0188085	0.00315231	2.38e-09	6.72254e-05	35.5999
	Alcoholic drinks per week	rs72770409	T	C	0.0583	-0.0224328	0.00444236	4.43e-07	4.84372e-05	25.4999
	Alcoholic drinks per week	rs153106	C	T	0.409	-0.0136118	0.00195858	3.63e-12	9.08435e-05	48.3
	Alcoholic drinks per week	rs1971157	C	G	0.384	0.00976747	0.00198143	8.22e-07	4.7944e-05	24.2999
	Alcoholic drinks per week	rs10438820	T	C	0.685	0.0113073	0.00210699	8.04e-08	5.38085e-05	28.7999
	Alcoholic drinks per week	rs2411759	T	C	0.429	0.00893085	0.00194425	4.36e-06	4.03486e-05	21.0999
	Alcoholic drinks per week	rs11656013	C	T	0.213	-0.0117107	0.00231001	3.97e-07	4.8609e-05	25.7002
	Alcoholic drinks per week	rs34121753	G	A	0.532	0.0110694	0.00195072	1.39e-08	6.21367e-05	32.2001
	Alcoholic drinks per week	rs7502556	C	T	0.609	0.00996642	0.00198143	4.84e-07	4.72016e-05	25.2999
	Alcoholic drinks per week	rs79415988	T	C	0.261	0.0104751	0.00227506	4.05e-06	4.04888e-05	21.1997
	Alcoholic drinks per week	rs76640332	A	G	0.204	-0.0210081	0.00238944	1.47e-18	0.00015009	77.3
	Alcoholic drinks per week	rs1011392	G	A	0.346	-0.011148	0.00205951	6.23e-08	5.54126e-05	29.2998
	Alcoholic drinks per week	rs28597806	G	A	0.38	0.0100646	0.00198532	3.93e-07	4.79721e-05	25.6998
	Alcoholic drinks per week	rs1942964	G	T	0.477	-0.00998794	0.00192934	2.24e-07	5.14538e-05	26.7999
	Alcoholic drinks per week	rs676388	C	T	0.494	0.0150976	0.00193147	5.49e-15	0.000114837	61.0996
	Alcoholic drinks per week	rs6106989	A	G	0.628	0.0108994	0.00198336	3.81e-08	5.80034e-05	30.1995
	Alcoholic drinks per week	rs6136466	T	C	0.397	-0.00944445	0.00196504	1.51e-06	4.31156e-05	23.0998
	Alcoholic drinks per week	rs17884691	A	G	0.221	-0.0106595	0.00225224	2.22e-06	4.54519e-05	22.3997
	Alcoholic drinks per week	rs9607814	A	C	0.212	-0.0128877	0.00252263	3.16e-07	5.25452e-05	26.1001
	Coffee intake	rs4970968	T	G	0.635666	-0.00798337	0.00167734	1.9e-06	5.28192e-05	22.6531
	Coffee intake	rs1182580	T	C	0.473557	0.00792474	0.00161892	9.8e-07	5.58701e-05	23.9617
	Coffee intake	rs516636	A	C	0.208913	0.0116767	0.00198419	4e-09	8.07464e-05	34.6315
	Coffee intake	rs4615895	A	G	0.740926	0.0122025	0.00184972	4.2e-11	0.000101467	43.5195
	Coffee intake	rs78308709	C	T	0.064107	-0.0169235	0.00332201	3.5e-07	6.05113e-05	25.9523
	Coffee intake	rs2842183	C	T	0.219105	-0.00952625	0.00194995	1e-06	5.5649e-05	23.8668
	Coffee intake	rs11206378	A	G	0.644433	0.00794074	0.00168534	2.5e-06	5.17617e-05	22.1996
	Coffee intake	rs6691876	A	C	0.673322	-0.00916246	0.00171872	9.8e-08	6.62628e-05	28.4192
	Coffee intake	rs144620429	T	C	0.091272	0.0132433	0.00281067	2.5e-06	5.17648e-05	22.2009
	Coffee intake	rs6544966	T	C	0.498437	0.00781928	0.00162183	1.4e-06	5.41981e-05	23.2445
	Coffee intake	rs10193706	C	A	0.523265	0.00814937	0.00162375	5.2e-07	5.87312e-05	25.1888
	Coffee intake	rs7585210	A	C	0.703917	-0.00811436	0.00176969	4.5e-06	4.90205e-05	21.0238
	Coffee intake	rs780093	C	T	0.615839	0.0132935	0.00165695	1e-15	0.000150065	64.3662
	Coffee intake	rs13387939	A	C	0.828363	0.0165558	0.0021386	9.8e-15	0.000139722	59.9293
	Coffee intake	rs7590617	G	A	0.502577	0.00749698	0.00161288	3.3e-06	5.03769e-05	21.6056
	Coffee intake	rs11678584	T	A	0.139373	0.0125477	0.00233576	7.8e-08	6.72864e-05	28.8582
	Coffee intake	rs1527961	C	T	0.1349	-0.0133431	0.00236585	1.7e-08	7.41637e-05	31.808
	Coffee intake	rs730632	T	C	0.178755	0.0105066	0.00212611	7.7e-07	5.69394e-05	24.4203
	Coffee intake	rs12989746	T	G	0.249928	0.01035	0.00186429	2.8e-08	7.18633e-05	30.8214
	Coffee intake	rs2595223	C	T	0.594764	-0.00827745	0.00166995	7.2e-07	5.72856e-05	24.5688
	Coffee intake	rs13088645	A	T	0.419514	0.00775127	0.00164591	2.5e-06	5.17125e-05	22.1785
	Coffee intake	rs13096450	G	A	0.128084	-0.0116006	0.00242354	1.7e-06	5.34222e-05	22.9118
	Coffee intake	rs34715167	T	C	0.375558	0.00825204	0.00166757	7.5e-07	5.70971e-05	24.488
	Coffee intake	rs73123665	G	A	0.058482	-0.0163567	0.00345948	2.3e-06	5.21233e-05	22.3546
	Coffee intake	rs763030	C	G	0.144872	-0.0115101	0.00230536	6e-07	5.81219e-05	24.9275
	Coffee intake	rs55716899	C	T	0.428559	0.0079027	0.00163369	1.3e-06	5.45598e-05	23.3997
	Coffee intake	rs77350503	C	T	0.093611	0.0132188	0.00288669	4.7e-06	4.8893e-05	20.9692
	Coffee intake	rs1447365	G	A	0.668261	0.00831566	0.00171687	1.3e-06	5.4699e-05	23.4594
	Coffee intake	rs2597805	T	C	0.682463	0.00985502	0.00175623	2e-08	7.34184e-05	31.4884
	Coffee intake	rs2350804	T	C	0.72614	-0.00893604	0.00183257	1.1e-06	5.54408e-05	23.7775
	Coffee intake	rs12649199	A	G	0.284214	-0.00844732	0.00179152	2.4e-06	5.1839e-05	22.2327
	Coffee intake	rs2189234	G	T	0.617795	0.00998689	0.00166052	1.8e-09	8.43374e-05	36.1718
	Coffee intake	rs10938398	A	G	0.43387	0.00752073	0.00163313	4.1e-06	4.94472e-05	21.2069
	Coffee intake	rs2231142	T	G	0.112884	-0.0125686	0.00254559	7.9e-07	5.68403e-05	24.3778
	Coffee intake	rs13163336	A	C	0.15761	0.0149472	0.00221005	1.3e-11	0.000106648	45.7418
	Coffee intake	rs10053913	G	A	0.35574	0.00835702	0.0016954	8.3e-07	5.66524e-05	24.2972
	Coffee intake	rs874573	T	A	0.240062	0.00921619	0.00189353	1.1e-06	5.52356e-05	23.6895
	Coffee intake	rs116814395	A	T	0.020339	-0.0282869	0.00616333	4.4e-06	4.91137e-05	21.0639
	Coffee intake	rs12514566	A	G	0.337107	-0.0113972	0.00170562	2.4e-11	0.000104105	44.6509
	Coffee intake	rs1338549	G	T	0.533932	-0.00945121	0.0016218	5.6e-09	7.91827e-05	33.9608
	Coffee intake	rs9398171	T	C	0.71064	0.0108577	0.00177995	1.1e-09	8.67575e-05	37.2099
	Coffee intake	rs6937318	C	T	0.508932	-0.00849812	0.00161011	1.3e-07	6.49518e-05	27.8569
	Coffee intake	rs9296406	C	T	0.540804	0.00775612	0.00161924	1.7e-06	5.34968e-05	22.9438
	Coffee intake	rs2465037	A	C	0.343017	-0.0106317	0.00170743	4.8e-10	9.03992e-05	38.7719
	Coffee intake	rs56349356	A	G	0.021231	-0.0270569	0.00590644	4.6e-06	4.89292e-05	20.9847
	Coffee intake	rs7743687	C	T	0.335081	0.00843609	0.0017121	8.3e-07	5.66088e-05	24.2785
	Coffee intake	rs6969878	G	A	0.212997	-0.0107221	0.00197048	5.3e-08	6.90351e-05	29.6083
	Coffee intake	rs73075167	T	A	0.12918	-0.0160639	0.00244429	5e-11	0.000100702	43.1911
	Coffee intake	rs2027950	C	G	0.478028	0.00805665	0.00161437	6e-07	5.80714e-05	24.9058
	Coffee intake	rs7811609	T	C	0.374746	0.00913864	0.00166468	4e-08	7.02677e-05	30.137
	Coffee intake	rs13437947	A	G	0.158042	0.010406	0.00221371	2.6e-06	5.15215e-05	22.0965
	Coffee intake	rs4410790	C	T	0.632141	0.039072	0.00167288	1.2e-120	0.00127038	545.506
	Coffee intake	rs55780162	G	A	0.380815	0.00783105	0.0016606	2.4e-06	5.18528e-05	22.2386
	Coffee intake	rs28490963	A	G	0.07376	0.0151478	0.00309373	9.8e-07	5.58978e-05	23.9735
	Coffee intake	rs34060476	G	A	0.133855	0.0184292	0.00237033	7.5e-15	0.000140935	60.4496
	Coffee intake	rs1057868	T	C	0.284986	0.0199509	0.00178517	5.4e-29	0.000291155	124.9
	Coffee intake	rs2373834	G	A	0.805342	-0.00935074	0.00203957	4.5e-06	4.90092e-05	21.019
	Coffee intake	rs35303290	T	C	0.334288	-0.00877658	0.00171097	2.9e-07	6.13513e-05	26.3126
	Coffee intake	rs442355	C	G	0.254435	-0.0111372	0.00185374	1.9e-09	8.41593e-05	36.0954
	Coffee intake	rs16930598	A	G	0.04291	-0.0187189	0.0040086	3e-06	5.08438e-05	21.8059
	Coffee intake	rs6989976	G	A	0.611954	0.00772571	0.00160504	1.5e-06	5.40214e-05	23.1688
	Coffee intake	rs78267637	G	C	0.038115	-0.0254259	0.00431659	3.9e-09	8.08948e-05	34.6952
	Coffee intake	rs9650210	A	C	0.112471	0.0127624	0.00255927	6.1e-07	5.79818e-05	24.8674
	Coffee intake	rs117514553	G	A	0.029348	0.0224116	0.00479584	3e-06	5.09189e-05	21.8381
	Coffee intake	rs76852278	A	C	0.022683	0.027238	0.00551702	7.9e-07	5.68331e-05	24.3747
	Coffee intake	rs6469262	C	T	0.564966	-0.00915347	0.00162895	1.9e-08	7.36222e-05	31.5758
	Coffee intake	rs55895231	G	A	0.11589	-0.0118593	0.00254317	3.1e-06	5.07025e-05	21.7453
	Coffee intake	rs723145	G	A	0.79774	0.00982363	0.00201036	1e-06	5.56745e-05	23.8778
	Coffee intake	rs10119174	C	G	0.571035	-0.00939786	0.00164159	1e-08	7.64152e-05	32.7738
	Coffee intake	rs4877113	G	A	0.393534	0.00808439	0.00164982	9.6e-07	5.59863e-05	24.0115
	Coffee intake	rs4836963	A	G	0.098024	0.0132629	0.00279445	2.1e-06	5.25226e-05	22.5259
	Coffee intake	rs10992783	T	C	0.418651	-0.00762258	0.00163964	3.3e-06	5.03929e-05	21.6125
	Coffee intake	rs56212739	A	G	0.195274	0.00985949	0.00203364	1.2e-06	5.48052e-05	23.5049
	Coffee intake	rs76881016	G	A	0.072173	0.0160924	0.00311938	2.5e-07	6.2053e-05	26.6136
	Coffee intake	rs2577374	A	G	0.587341	0.00860301	0.00164027	1.6e-07	6.41397e-05	27.5086
	Coffee intake	rs117810762	A	G	0.017881	0.0359086	0.00617871	6.2e-09	7.87502e-05	33.7753
	Coffee intake	rs11236225	G	A	0.201949	-0.0102005	0.00204207	5.9e-07	5.81783e-05	24.9517
	Coffee intake	rs4938000	C	T	0.660564	-0.00838043	0.00171552	1e-06	5.56418e-05	23.8638
	Coffee intake	rs2126069	T	C	0.484986	0.00883536	0.00162571	5.5e-08	6.88679e-05	29.5366
	Coffee intake	rs2372891	A	T	0.227749	0.00931952	0.00193488	1.5e-06	5.40929e-05	23.1994
	Coffee intake	rs17144566	T	C	0.19648	-0.0108784	0.00203021	8.4e-08	6.69427e-05	28.7109
	Coffee intake	rs4937720	G	C	0.66936	-0.00799356	0.00172372	3.5e-06	5.01429e-05	21.5053
	Coffee intake	rs641727	G	T	0.312329	-0.00937649	0.00174173	7.3e-08	6.75731e-05	28.9812
	Coffee intake	rs11032480	G	C	0.691716	0.00830272	0.00174659	2e-06	5.26891e-05	22.5973
	Coffee intake	rs73228435	A	G	0.040892	-0.0214982	0.00413331	2e-07	6.30762e-05	27.0524
	Coffee intake	rs61928609	C	A	0.835328	-0.0147305	0.00217536	1.3e-11	0.000106908	45.8533
	Coffee intake	rs7989746	C	A	0.467373	-0.00751752	0.00162196	3.6e-06	5.00878e-05	21.4816
	Coffee intake	rs13378240	T	A	0.293173	-0.00868802	0.00177269	9.5e-07	5.60062e-05	24.0201
	Coffee intake	rs71429826	A	C	0.221581	0.0091491	0.00196768	3.3e-06	5.04093e-05	21.6195
	Coffee intake	rs13378244	A	G	0.41927	0.00789038	0.00163912	1.5e-06	5.403e-05	23.1725
	Coffee intake	rs1959205	C	G	0.573251	0.00805597	0.00164078	9.1e-07	5.62076e-05	24.1064
	Coffee intake	rs2400677	C	T	0.574294	-0.00828484	0.00163355	3.9e-07	5.99738e-05	25.7218
	Coffee intake	rs12891244	G	C	0.575219	0.00806177	0.00163419	8.1e-07	5.67434e-05	24.3363
	Coffee intake	rs2521501	T	A	0.322039	-0.0092605	0.00173964	1e-07	6.60702e-05	28.3366
	Coffee intake	rs2472297	T	C	0.262883	0.0464708	0.00182733	1.1e-142	0.00150576	646.732
	Coffee intake	rs117968677	A	G	0.024207	-0.0310299	0.00551601	1.9e-08	7.37841e-05	31.6453
	Coffee intake	rs10500356	C	T	0.441636	0.00786905	0.00162917	1.4e-06	5.43967e-05	23.3297
	Coffee intake	rs4984636	C	T	0.320663	-0.0081689	0.00172771	2.3e-06	5.21251e-05	22.3555
	Coffee intake	rs1421085	C	T	0.40357	0.0185426	0.00164436	1.7e-29	0.000296417	127.159
	Coffee intake	rs56791931	T	G	0.143448	-0.0114386	0.0023313	9.3e-07	5.61319e-05	24.074
	Coffee intake	rs8056750	T	C	0.359129	0.0105333	0.00173692	1.3e-09	8.57465e-05	36.7762
	Coffee intake	rs12930957	C	T	0.641842	0.00824709	0.00168174	9.4e-07	5.60717e-05	24.0482
	Coffee intake	rs8068193	A	G	0.406522	0.00766347	0.00164989	3.4e-06	5.03041e-05	21.5744
	Coffee intake	rs7224815	T	A	0.407832	-0.0108602	0.00164162	3.7e-11	0.00010204	43.7651
	Coffee intake	rs62064918	T	C	0.244545	-0.0103075	0.00187872	4.1e-08	7.01837e-05	30.101
	Coffee intake	rs57918684	A	G	0.154747	0.0128864	0.00223845	8.6e-09	7.72715e-05	33.1411
	Coffee intake	rs476828	C	T	0.237409	0.0173461	0.00189543	5.6e-20	0.000195249	83.7503
	Coffee intake	rs1942965	C	T	0.504585	-0.00890339	0.00161917	3.8e-08	7.04985e-05	30.236
	Coffee intake	rs630194	C	T	0.343374	-0.0113533	0.00169853	2.3e-11	0.000104169	44.6782
	Coffee intake	rs12604773	G	A	0.662603	-0.0086196	0.00170546	4.3e-07	5.95593e-05	25.544
	Coffee intake	rs9953004	T	C	0.345919	0.00786658	0.00170002	3.7e-06	4.9926e-05	21.4122
	Coffee intake	rs34276507	A	G	0.341586	0.00785948	0.00171018	4.3e-06	4.92456e-05	21.1204
	Coffee intake	rs56113850	C	T	0.578109	0.0126667	0.00163351	8.9e-15	0.000140187	60.1286
	Coffee intake	rs62121718	G	A	0.260961	-0.00878223	0.00185225	2.1e-06	5.2417e-05	22.4806
	Coffee intake	rs75347775	A	G	0.244531	0.0104504	0.00187898	2.7e-08	7.21231e-05	30.9328
	Coffee intake	rs6063085	C	A	0.373473	0.0104106	0.00166919	4.5e-10	9.06954e-05	38.899
	Coffee intake	rs6030315	A	C	0.394128	-0.00775256	0.0016537	2.8e-06	5.12435e-05	21.9773
	Coffee intake	rs6062682	T	C	0.464546	0.0103704	0.00163929	2.5e-10	9.3309e-05	40.02
	Coffee intake	rs13054099	C	T	0.261004	-0.0107777	0.00183597	4.3e-09	8.03472e-05	34.4603
	Coffee intake	rs17842490	G	A	0.014248	-0.0451683	0.00680848	3.3e-11	0.000102614	44.0114
	Relative carbohydrate intake	rs199959	T	G	NA	-0.01678	0.00353	2.037e-06	8.55842e-05	22.596
	Relative carbohydrate intake	rs12731171	T	C	NA	-0.0143	0.00296	1.404e-06	9.29768e-05	23.3392
	Relative carbohydrate intake	rs2339791	A	G	NA	-0.01658	0.00359	3.986e-06	8.33113e-05	21.3293
	Relative carbohydrate intake	rs1561441	A	G	NA	-0.06514	0.01297	5.147e-07	0.000115693	25.2239
	Relative carbohydrate intake	rs685316	T	C	NA	0.01355	0.00275	8.576e-07	9.19537e-05	24.2778
	Relative carbohydrate intake	rs3740677	T	G	NA	0.01627	0.00338	1.497e-06	9.01508e-05	23.1707
	Relative carbohydrate intake	rs10790828	T	C	NA	-0.01589	0.00315	4.697e-07	9.63787e-05	25.4462
	Relative carbohydrate intake	rs36012471	T	C	NA	0.04073	0.00863	2.338e-06	0.000104075	22.2743
	Relative carbohydrate intake	rs140416382	A	G	NA	0.05332	0.01165	4.713e-06	9.39253e-05	20.9471
	Relative carbohydrate intake	rs35950653	A	G	NA	0.03983	0.00801	6.571e-07	0.000109882	24.7259
	Relative carbohydrate intake	rs66461959	A	C	NA	-0.0239	0.00457	1.674e-07	0.000103589	27.3502
	Relative carbohydrate intake	rs191953153	A	C	NA	-0.10572	0.02178	1.218e-06	0.000137766	23.561
	Relative carbohydrate intake	rs7190396	T	G	NA	0.01781	0.00281	2.393e-10	0.000152141	40.1709
	Relative carbohydrate intake	rs36123991	T	G	NA	0.0213	0.00369	8.238e-09	0.000148728	33.3198
	Relative carbohydrate intake	rs7225065	T	C	NA	-0.01402	0.00296	2.129e-06	8.49712e-05	22.4341
	Relative carbohydrate intake	rs8097672	A	T	NA	0.02346	0.00391	1.949e-09	0.000136345	35.9997
	Relative carbohydrate intake	rs4797242	A	C	NA	0.01405	0.00301	3.081e-06	8.25239e-05	21.7879
	Relative carbohydrate intake	rs3892355	A	G	NA	0.01506	0.00302	5.945e-07	9.90648e-05	24.8675
	Relative carbohydrate intake	rs4420638	A	G	NA	-0.02415	0.00372	8.849e-11	0.000176309	42.1449
	Relative carbohydrate intake	rs838144	T	C	NA	-0.02323	0.00275	3.261e-17	0.000270216	71.3559
	Relative carbohydrate intake	rs12713642	C	G	NA	-0.01368	0.00292	2.832e-06	8.31317e-05	21.9484
	Relative carbohydrate intake	rs62131770	T	C	NA	-0.01413	0.00303	3.056e-06	8.9119e-05	21.7468
	Relative carbohydrate intake	rs549814	T	C	NA	-0.01447	0.00295	9.001e-07	9.28866e-05	24.0597
	Relative carbohydrate intake	rs10206338	A	G	NA	-0.01577	0.00279	1.516e-08	0.000121004	31.9486
	Relative carbohydrate intake	rs12618892	T	C	NA	0.01461	0.00306	1.862e-06	8.63408e-05	22.7958
	Relative carbohydrate intake	rs34444368	A	G	NA	-0.01467	0.00286	2.901e-07	9.96508e-05	26.3102
	Relative carbohydrate intake	rs6131587	T	C	NA	0.01341	0.00275	1.099e-06	9.00636e-05	23.7787
	Relative carbohydrate intake	rs11128899	A	T	NA	-0.01428	0.00283	4.319e-07	9.64357e-05	25.4613
	Relative carbohydrate intake	rs10433500	A	G	NA	0.01608	0.00286	1.961e-08	0.000119725	31.6109
	Relative carbohydrate intake	rs62286519	A	G	NA	0.01893	0.00391	1.297e-06	8.8778e-05	23.4393
	Relative carbohydrate intake	rs2916412	T	G	NA	-0.01626	0.00316	2.675e-07	0.000113136	26.4767
	Relative carbohydrate intake	rs3733282	A	G	NA	0.01879	0.00392	1.605e-06	8.97434e-05	22.9762
	Relative carbohydrate intake	rs111543463	T	C	NA	-0.04974	0.01029	1.354e-06	0.00010114	23.3656
	Relative carbohydrate intake	rs75239413	T	C	NA	0.03879	0.00847	4.675e-06	9.07865e-05	20.9734
	Relative carbohydrate intake	rs6925749	T	C	NA	0.01578	0.00322	9.804e-07	9.3804e-05	24.0159
	Relative carbohydrate intake	rs2580009	T	C	NA	-0.01388	0.0028	7.396e-07	9.30719e-05	24.5731
	Relative carbohydrate intake	rs217536	T	C	NA	-0.0131	0.00283	3.566e-06	8.36938e-05	21.4272
	Relative carbohydrate intake	rs272678	T	G	NA	-0.01261	0.00276	4.99e-06	7.90631e-05	20.8741
	Relative carbohydrate intake	rs7012637	A	G	NA	0.01734	0.00278	4.684e-10	0.000150191	38.905
	Relative carbohydrate intake	rs13277640	T	C	NA	0.01275	0.00275	3.639e-06	8.14171e-05	21.4957
	Relative carbohydrate intake	rs10962121	T	G	NA	-0.01519	0.00275	3.395e-08	0.000115557	30.5103
	Relative fat intake	rs10789340	A	G	NA	0.01471	0.00285	2.469e-07	0.000100899	26.6399
	Relative fat intake	rs729833	T	C	NA	-0.01484	0.00322	3.944e-06	8.04484e-05	21.2399
	Relative fat intake	rs11576925	C	G	NA	-0.01718	0.00376	4.944e-06	0.000101829	20.8769
	Relative fat intake	rs35789556	A	G	NA	0.01565	0.00324	1.321e-06	8.83683e-05	23.3311
	Relative fat intake	rs873756	C	G	NA	-0.01521	0.00313	1.156e-06	0.000115177	23.6138
	Relative fat intake	rs986527	A	G	NA	-0.01296	0.00281	3.904e-06	8.05672e-05	21.2713
	Relative fat intake	rs9315498	A	C	NA	0.01299	0.00275	2.428e-06	8.45108e-05	22.3126
	Relative fat intake	rs4886343	A	G	NA	-0.01947	0.00404	1.48e-06	8.79685e-05	23.2255
	Relative fat intake	rs143458040	T	G	NA	-0.09686	0.02023	1.676e-06	0.000134043	22.9241
	Relative fat intake	rs4277294	A	T	NA	-0.02761	0.00526	1.573e-07	0.000104355	27.5523
	Relative fat intake	rs10468280	A	G	NA	-0.01929	0.00281	7.023e-12	0.000178472	47.1247
	Relative fat intake	rs7218313	A	C	NA	-0.01322	0.00275	1.587e-06	8.75297e-05	23.1097
	Relative fat intake	rs4891017	A	G	NA	-0.01384	0.00301	4.174e-06	8.80825e-05	21.1415
	Relative fat intake	rs11549609	T	C	NA	0.08866	0.01931	4.431e-06	0.000123265	21.0807
	Relative fat intake	rs8106503	T	C	NA	-0.02042	0.00433	2.439e-06	8.61943e-05	22.2399
	Relative fat intake	rs33988101	T	G	NA	-0.0294	0.00276	1.664e-26	0.000429621	113.468
	Relative fat intake	rs75971153	T	C	NA	-0.01822	0.00361	4.603e-07	0.000104387	25.4729
	Relative fat intake	rs752208	A	G	NA	-0.01921	0.00376	3.159e-07	0.000124281	26.1021
	Relative fat intake	rs10206338	A	G	NA	0.01291	0.00279	3.608e-06	8.1097e-05	21.4112
	Relative fat intake	rs72881195	A	G	NA	0.03306	0.00721	4.478e-06	0.000116147	21.0247
	Relative fat intake	rs6131331	A	C	NA	0.01732	0.00355	1.1e-06	9.01563e-05	23.8032
	Relative fat intake	rs11697842	A	G	NA	0.01434	0.00305	2.676e-06	9.05877e-05	22.1052
	Relative fat intake	rs5755961	T	G	NA	0.01899	0.00404	2.664e-06	8.36849e-05	22.0945
	Relative fat intake	rs1603891	A	G	NA	-0.01373	0.00283	1.172e-06	9.37678e-05	23.5377
	Relative fat intake	rs4683902	A	C	NA	0.05803	0.01257	3.913e-06	0.00011457	21.3123
	Relative fat intake	rs12516875	A	G	NA	-0.01405	0.00298	2.463e-06	8.41937e-05	22.2288
	Relative fat intake	rs4580876	A	G	NA	-0.01314	0.00275	1.823e-06	8.64737e-05	22.8308
	Relative fat intake	rs57193069	A	G	NA	-0.01574	0.0028	1.801e-08	0.000122467	31.6002
	Relative fat intake	rs272678	T	G	NA	0.01456	0.00276	1.358e-07	0.000105403	27.8292
	Relative fat intake	rs62466318	T	C	NA	-0.01709	0.00348	8.88e-07	9.34685e-05	24.1169
	Relative fat intake	rs2005737	A	G	NA	-0.01475	0.00312	2.193e-06	9.38982e-05	22.3497
	Relative fat intake	rs7012814	A	G	NA	-0.0189	0.00278	1.122e-11	0.000178425	46.2201
	Relative fat intake	rs9969531	C	G	NA	-0.01367	0.00284	1.436e-06	8.77523e-05	23.1685
	Relative fat intake	rs113971372	A	G	NA	-0.04823	0.01026	2.585e-06	9.56503e-05	22.0971
	Relative protein intake	rs192935283	A	C	NA	0.09045	0.01931	2.823e-06	0.000128292	21.9406
	Relative protein intake	rs77975053	C	G	NA	-0.02786	0.00603	3.789e-06	0.000117923	21.3463
	Relative protein intake	rs10828186	A	C	NA	0.01874	0.00401	2.904e-06	8.272e-05	21.8397
	Relative protein intake	rs10734012	T	C	NA	-0.01387	0.0028	7.215e-07	9.58419e-05	24.5377
	Relative protein intake	rs2582908	C	G	NA	-0.01341	0.00275	1.106e-06	9.00636e-05	23.7787
	Relative protein intake	rs79813431	C	G	NA	-0.04041	0.00869	3.297e-06	9.36021e-05	21.6239
	Relative protein intake	rs61882542	T	C	NA	-0.02312	0.00458	4.419e-07	9.65159e-05	25.4825
	Relative protein intake	rs61928280	A	C	NA	0.01542	0.00336	4.396e-06	7.97722e-05	21.0614
	Relative protein intake	rs10745508	T	C	NA	-0.01326	0.00275	1.467e-06	8.80602e-05	23.2498
	Relative protein intake	rs17455688	T	C	NA	0.0278	0.00565	8.545e-07	9.16957e-05	24.2097
	Relative protein intake	rs4775698	T	G	NA	-0.01513	0.00301	5.019e-07	9.56972e-05	25.2663
	Relative protein intake	rs11073752	T	C	NA	0.0156	0.00295	1.267e-07	0.000105914	27.9642
	Relative protein intake	rs228751	A	G	NA	-0.0127	0.00276	4.315e-06	8.01956e-05	21.1732
	Relative protein intake	rs72835501	C	G	NA	0.03749	0.00801	2.823e-06	0.000119041	21.9059
	Relative protein intake	rs77656144	C	G	NA	-0.02556	0.00549	3.183e-06	0.000102234	21.6757
	Relative protein intake	rs838133	A	G	NA	-0.03182	0.00301	4.523e-26	0.000500893	111.754
	Relative protein intake	rs141013224	A	G	NA	-0.0496	0.0107	3.562e-06	0.000106365	21.4878
	Relative protein intake	rs780094	T	C	NA	0.01752	0.00282	5.577e-10	0.000146185	38.5982
	Relative protein intake	rs445551	A	G	NA	0.01919	0.00339	1.493e-08	0.000156289	32.044
	Relative protein intake	rs6041160	T	C	NA	0.01595	0.00346	3.989e-06	8.04878e-05	21.2503
	Relative protein intake	rs6024454	T	C	NA	-0.01684	0.00346	1.14e-06	8.972e-05	23.688
	Relative protein intake	rs1470690	T	G	NA	0.01325	0.00283	2.786e-06	8.30269e-05	21.9208
	Relative protein intake	rs1603978	A	C	NA	0.01917	0.00299	1.352e-10	0.000155679	41.1054
	Relative protein intake	rs75248627	C	G	NA	0.0536	0.01098	1.042e-06	0.0001093	23.8298
	Relative protein intake	rs1532769	T	C	NA	0.01551	0.00285	5.054e-08	0.000119407	29.6163
	Relative protein intake	rs13146907	A	G	NA	-0.0219	0.00284	1.24e-14	0.00022519	59.4632
	Relative protein intake	rs139975395	T	C	NA	-0.077	0.01578	1.054e-06	0.000118446	23.8102
	Relative protein intake	rs76900572	T	G	NA	0.05824	0.01266	4.176e-06	0.000123744	21.1627
	Relative protein intake	rs2624495	A	G	NA	-0.01267	0.00276	4.342e-06	7.98172e-05	21.0733
	Relative protein intake	rs1368285	T	G	NA	-0.01673	0.00363	4.046e-06	8.04525e-05	21.241
	Relative protein intake	rs138187954	T	C	NA	0.04426	0.00962	4.244e-06	9.20248e-05	21.1675
	Relative protein intake	rs4708061	A	G	NA	-0.01329	0.00275	1.395e-06	8.8459e-05	23.3551
	Relative protein intake	rs1461729	A	G	NA	0.03183	0.00459	4.087e-12	0.000182123	48.0889
	Relative protein intake	rs141331590	A	G	NA	-0.05936	0.01221	1.156e-06	0.000105502	23.6348
	Relative protein intake	rs2953517	T	C	NA	0.01436	0.0031	3.65e-06	8.1273e-05	21.4577
	Relative protein intake	rs1891210	T	G	NA	-0.01357	0.00277	9.746e-07	9.08985e-05	23.9992
	Relative protein intake	rs357537	A	G	NA	-0.02253	0.00462	1.08e-06	9.00732e-05	23.7813
	Relative protein intake	rs10759212	A	G	NA	0.01275	0.00276	3.686e-06	8.08282e-05	21.3402
	Relative sugar intake	rs2992037	A	G	NA	0.01605	0.00329	1.092e-06	0.000113316	23.7987
	Relative sugar intake	rs2407687	A	G	NA	-0.02225	0.00487	4.947e-06	9.31781e-05	20.8736
	Relative sugar intake	rs41313999	A	G	NA	-0.0405	0.00864	2.795e-06	0.000122737	21.9724
	Relative sugar intake	rs767304	A	G	NA	-0.03963	0.00765	2.195e-07	0.000140485	26.8362
	Relative sugar intake	rs11192616	T	C	NA	0.0145	0.00309	2.763e-06	9.57303e-05	22.0199
	Relative sugar intake	rs28806851	A	G	NA	0.01602	0.00339	2.27e-06	0.000121354	22.3317
	Relative sugar intake	rs2166318	A	G	NA	-0.01403	0.00301	3.078e-06	9.44525e-05	21.7259
	Relative sugar intake	rs10893574	T	C	NA	0.01391	0.00297	2.911e-06	9.53613e-05	21.935
	Relative sugar intake	rs7138306	A	G	NA	-0.01378	0.00295	3.031e-06	9.44499e-05	21.8198
	Relative sugar intake	rs10860331	T	G	NA	-0.02635	0.00541	1.096e-06	0.000103132	23.7226
	Relative sugar intake	rs4145641	A	C	NA	0.01655	0.00342	1.294e-06	0.000101806	23.4175
	Relative sugar intake	rs4905994	T	C	NA	-0.01613	0.00317	3.602e-07	0.000112557	25.8909
	Relative sugar intake	rs35107470	A	G	NA	0.01654	0.0034	1.112e-06	0.000119508	23.6651
	Relative sugar intake	rs9972653	T	G	NA	-0.02029	0.00301	1.533e-11	0.000197523	45.4388
	Relative sugar intake	rs8097672	A	T	NA	0.02953	0.00418	1.542e-12	0.000216946	49.908
	Relative sugar intake	rs341228	T	C	NA	0.01863	0.00313	2.724e-09	0.000154008	35.4269
	Relative sugar intake	rs650313	A	G	NA	0.01518	0.00332	4.926e-06	9.04932e-05	20.9056
	Relative sugar intake	rs806705	T	C	NA	-0.02184	0.00478	4.843e-06	9.07574e-05	20.8759
	Relative sugar intake	rs12721051	C	G	NA	-0.02615	0.00396	4.074e-11	0.000206624	43.6063
	Relative sugar intake	rs838144	T	C	NA	-0.02756	0.00295	8.527e-21	0.000379334	87.2792
	Relative sugar intake	rs76464830	A	T	NA	0.07358	0.01578	3.097e-06	0.000117512	21.7421
	Relative sugar intake	rs62131770	T	C	NA	-0.0163	0.00326	5.511e-07	0.000119033	24.9998
	Relative sugar intake	rs12713415	C	G	NA	-0.01911	0.00327	4.88e-09	0.00014977	34.1525
	Relative sugar intake	rs10194653	A	T	NA	-0.01561	0.00335	3.275e-06	9.3986e-05	21.7126
	Relative sugar intake	rs10170005	T	C	NA	0.01663	0.00328	3.82e-07	0.00011578	25.7059
	Relative sugar intake	rs11128818	T	C	NA	-0.01742	0.00376	3.654e-06	9.33152e-05	21.4643
	Relative sugar intake	rs12637133	A	G	NA	0.04563	0.00964	2.189e-06	0.00012377	22.4049
	Relative sugar intake	rs116036142	T	C	NA	0.05431	0.01163	3.035e-06	0.000115982	21.807
	Relative sugar intake	rs16846330	T	C	NA	-0.04592	0.00879	1.751e-07	0.000136438	27.2911
	Relative sugar intake	rs6820111	A	G	NA	0.01663	0.00309	7.081e-08	0.000137908	28.9643
	Relative sugar intake	rs12505589	T	C	NA	0.02189	0.00457	1.702e-06	0.000102416	22.9433
	Relative sugar intake	rs78803154	A	G	NA	0.02938	0.00642	4.808e-06	9.10471e-05	20.9426
	Relative sugar intake	rs13176584	A	C	NA	-0.01707	0.00356	1.588e-06	9.9953e-05	22.9913
	Relative sugar intake	rs13202107	A	G	NA	-0.02016	0.00358	1.768e-08	0.000137857	31.7111
	Relative sugar intake	rs74573274	T	C	NA	0.01857	0.00365	3.484e-07	0.000115029	25.8842
	Relative sugar intake	rs73110562	A	G	NA	0.01477	0.00322	4.469e-06	9.39205e-05	21.04
	Relative sugar intake	rs7012814	A	G	NA	0.01856	0.00298	4.994e-10	0.000172372	38.79
	Relative sugar intake	rs59664734	A	G	NA	-0.0152	0.00328	3.473e-06	9.33622e-05	21.4751
	Relative sugar intake	rs34508794	C	G	NA	-0.02136	0.00449	1.952e-06	0.000103803	22.6311
	SNP, single nucleotide polymorphisms; EA, effect allele; EAF, effect allele frequency; NEA, non-effect allele; SE, standard error; MVPA, moderate-to-vigorous intensity physical activity during leisure time;

## Sheet: Table S4
	Table S4. Detailed information of single-nucleotide polymorphism-phenotype associations using LD Link database
	SNP	Trait	PubMed ID	Risk Allele Frequency	Beta/OR	Effect Size(95%CI)	P value
	rs8614	Brain region volumes	31676860	NR	NA	NA	6e-09
	rs8614	Headache	29397368	NR	0.011	0.007-0.014	4e-09
	rs8614	Medication use (drugs used in diabetes)	34594039	NR	0.05	0.034-0.066	2e-09
	rs8614	Glucose levels	34594039	NR	0.017	0.012-0.021	8e-13
	rs8614	Headache or migraine	36939796	NR	NA	NA	5e-08
	rs8614	Pain (pleiotropy)	37844115	NR	0.017	0.011-0.023	3e-08
	rs8614	Alcohol consumption	32193382	0.818	0.015	0.0099-0.0205	3e-08
	rs8614	Lifetime smoking index	31689377	0.817	0.017	0.011-0.023	2e-10
	rs8614	Externalizing behaviour (multivariate analysis)	34446935	0.813	0.009	0.007-0.011	2e-10
	rs8614	Right molecular layer hippocampal volume (body)	37337106	0.496	0.049	0.032-0.066	2e-08
	rs8614	Cigarettes smoked per day	36477530	0.231	0.014	0.01-0.018	2e-13
	rs8614	Self-reported math ability (MTAG)	30038396	0.19	0.013	0.0085-0.0175	1e-08
	rs8614	Highest math class taken (MTAG)	30038396	0.19	0.013	0.0093-0.0175	2e-10
	rs8614	Educational attainment	35361970	0.187	0.013	0.01-0.015	3e-21
	rs8614	Smoking initiation	36477530	0.186	0.011	0.0093-0.0137	7e-25
	rs8614	Smoking initiation (ever regular vs never regular) (MTAG)	30643251	0.185	0.009	0.0063-0.0117	1e-10
	rs8614	Alcohol consumption	32193382	32193382	0.015	0.0099-0.0205	3e-08
	rs1217106	Smoking behaviour (cigarettes smoked per day)	30679032	0.782	0.029	0.019-0.039	4e-09
	rs1217106	Cigarettes smoked per day	36477530	0.788	0.029	0.014-0.022	2e-16
	rs74920406	Apolipoprotein B levels	33462484	NR	0.041	0.03-0.053	1e-12
	rs74920406	Low density lipoprotein cholesterol levels	33462484	NR	0.036	0.025-0.047	6e-10
	rs74920406	Body mass index	36581621	NR	0.021	0.015-0.027	1e-11
	rs12712072	Body mass index	31669095	NR	NA	NA	9e-17
	rs56084453	Body mass index	29273807	0.787	0.012	0.0078-0.0168	6e-08
	rs56084453	Body mass index	36581621	NR	0.012	0.0087-0.0149	3e-13
	rs11609798	Total cholesterol levels	35884923	NR	0.97	0.55-1.39	5e-06
	rs11609798	BMI (standard GWA)	37106081	NR	0.07	0.045-0.095	4e-08
	rs12089815	Body mass index	30595370	NR	NA	NA	3e-08
	rs12089815	Smoking status	30595370	NR	NA	NA	3e-11
	rs12089815	Externalizing behaviour (multivariate analysis)	34446935	0.453	0.014	0.012-0.016	2e-29
	rs12089815	Body mass index	31669095	NR	NA	NA	7e-09
	rs12089815	Educational attainment	35361970	0.54	0.019	0.016-0.021	1e-69
	rs12089815	Smoking status (standard GWA)	37106081	NR	0.01	0.0065-0.0134	2e-08
	rs12089815	Body mass index	37280435	NR	0.011	0.0073-0.0149	5e-09
	rs12089815	Smoking cessation (MTAG)	30643251	0.538	0.009	0.0063-0.0124	2e-09
	rs61813324	Body mass index	30595370	NR	NA	NA	8e-24
	rs61813324	Body mass index	30239722	0.131	0.029	0.023-0.034	3e-24
	rs61813324	Body mass index	31669095	NR	NA	NA	6e-24
	rs61813324	Body mass index	34594039	NR	0.028	0.021-0.035	5e-16
	rs61813324	Body mass index	39134668	NR	0.028	0.022-0.034	3e-20
	rs61813324	Body mass index	36581621	NR	0.026	0.022-0.031	3e-27
	rs61813324	Body mass index	37280435	NR	0.028	0.023-0.034	3e-24
	rs61813324	Body mass index	38538606	NR	0.029	0.022-0.036	7e-16
	rs61813324	Weight	34594039	NR	0.022	0.016-0.028	2e-13
	rs61813324	Whole body fat mass (UKB data field 23100)	36376304	NR	0.024	0.018-0.031	3e-12
	rs61813324	Body mass index (MTAG)	38538606	NR	0.031	0.025-0.037	4e-24
	rs2295027	Low density lipoprotein cholesterol levels	34887591	0.322	0.012	0.0086-0.0145	6e-11
	rs2295027	Total cholesterol levels	34887591	0.322	0.012	0.0089-0.0146	3e-11
	rs2431108	Falling risk	32999390	0.33	1.03	1.02-1.04	4e-08
	rs2431108	Daytime nap	33568662	NR	0.015	0.013-0.016	1e-57
	rs2431108	Insomnia	30804565	0.328	1.055	1.04-1.07	8e-17
	rs2431108	Smoking initiation	36477530	0.329	0.008	0.0059-0.0095	6e-17
	rs13107325	Alcohol use disorder	32451486	0.079	8.864	NA	8e-19
	rs13107325	Body mass index	31669095	NR	NA	NA	8e-39
	rs13107325	Type 2 diabetes	32541925	0.926	0.047	0.03-0.064	3e-08
	rs13107325	Alcohol consumption	31358974	0.07	0.016	0.012-0.02	1e-15
	rs13107325	High density lipoprotein cholesterol levels	33339817	NR	0.086	0.059-0.114	4e-10
	rs13107325	Adult body size	32376654	0.925	0.029	0.024-0.034	3e-28
	rs13107325	Alcohol use disorder (consumption score)	30336701	NR	0.01	0.0061-0.0139	3e-10
	rs13107325	Body mass index	30108127	NR	0.051	NA	3e-21
	rs13107325	HDL cholesterol	30275531	0.076	0.08	0.069-0.09-1	2e-50
	rs13107325	Body mass index	29273807	0.06	0.05	0.042-0.057	5e-40
	rs13107325	Body mass index	29381148	NR	0.011	NA	8e-06
	rs13107325	Low-density lipoprotein levels (MTAG)	36376304	NR	0.029	0.024-0.035	9e-29
	rs13107325	Triglyceride levels (MTAG)	36376304	NR	0.03	0.021-0.039	1e-10
	rs13107325	Triglyceride levels	32154731	NR	0.031	0.022-0.04	5e-10
	rs13107325	Low density lipoprotein cholesterol levels	32154731	NR	0.031	0.023-0.04	1e-10
	rs13107325	Low density lipoprotein cholesterol levels	29507422	NR	0.038	NA	8e-06
	rs13107325	Waist-to-hip ratio adjusted for BMI	34021172	NR	0.039	0.028-0.049	8e-13
	rs13107325	Body mass index	34021172	NR	0.04	0.024-0.056	4e-07
	rs13107325	Waist circumference adjusted for body mass index	34021172	NR	0.04	0.029-0.051	2e-13
	rs13107325	Total cholesterol levels	34594039	NR	0.042	0.033-0.05	3e-21
	rs13107325	Body mass index	37280435	NR	0.046	0.039-0.053	4e-38
	rs1362910	Highest math class taken	30038396	0.417	0.018	0.013-0.022	6e-15
	rs1362910	Body mass index	36581621	NR	0.013	0.0097-0.0155	2e-16
	rs11143585	Drinks per week	36477530	0.239	0.007	0.0053-0.0095	4e-12
	rs11143585	Drinks per week	36477530	0.231	0.008	0.0057-0.0096	2e-14
	rs1229984	Alcohol use disorder	32451486	0.03	22	NA	3e-107
	rs1229984	Alcohol consumption (drinks per week) (MTAG)	32451486	0.953	0.154	0.15-0.16	7e-280
	rs1229984	Esophageal cancer	32514122	0.261	2.066	1.865488484-2.287176659	3e-44
	rs1229984	Adult body size	32376654	0.027	0.023	0.015-0.031	3e-08
	rs1229984	Alcohol consumption (drinks per week)	30643251	0.963	0.151	0.14-0.16	2E-308
	rs1229984	Alcohol use disorder (consumption score)	30940813	0.97	0.34	0.31-0.37	5e-102
	rs1229984	Alcohol consumption (drinks per week)	28485404	0.05	0.19	0.22-0.16	3e-32
	rs1229984	Body mass index	28892062	0.27	0.034	0.022-0.046	1e-07
	rs1229984	Body mass index	34594039	NR	0.029	0.022-0.036	5e-17
	rs1229984	Body mass index	36581621	NR	0.039	0.03-0.049	3e-16
	rs1229984	Body mass index (MTAG)	36376304	NR	0.034	0.023-0.046	6e-09
	rs1229984	Daily alcohol intake	38277453	NR	0.168	0.15-0.18	6e-91
	rs1229984	Cardiovascular disease	30595370	NR	NA	NA	8e-15
	rs1229984	Drinks per week	36477530	0.927	0.139	0.13-0.15	2e-157
	rs1229984	LDL cholesterol levels	32203549	0.027	0.053	0.04-0.065	7e-17
	rs1229984	Low density lipoprotein cholesterol levels	32154731	NR	0.08	0.065-0.095	1e-20
	rs1229984	LDL cholesterol	34594039	NR	0.106	0.076-0.135	4e-12
	rs329122	Type 2 diabetes	28869590	0.43	1.04	1.03-1.06	3e-09
	rs329122	Body mass index	28892062	0.43	0.013	0.0091-0.0169	6e-08
	rs329122	Type 2 diabetes	28869590	0.427	0.045	0.026-0.065	6e-06
	rs329122	Type 2 diabetes	30297969	0.429	1.04	1.03-1.05	4e-09
	rs329122	Type 2 diabetes	35551307	0.429	0.037	0.023-0.051	2e-08
	rs329122	Smoking initiation	36477530	0.43	0.009	0.0076-0.0107	1e-31
	rs329122	Body mass index	36581621	NR	0.012	0.0091-0.0149	3e-16
	rs329122	Body mass index (MTAG)	36376304	NR	0.013	0.01-0.016	6e-16
	rs17155888	BMI (standard GWA)	37106081	NR	0.088	0.069-0.178	4e-12
	rs17155888	BMI (weighted GWA)	37106081	NR	0.124	0.011-0.019	8e-06
	rs4840338	Body mass index	38538606	NR	0.018	0.013-0.022	4e-13
	rs3732869	Body mass index (joint analysis main effects and physical activity interaction)	28448500	NR	NA	NA	8e-06
	rs3732869	Body mass index (joint analysis main effects and physical activity interaction)	28448500	NR	NA	NA	3e-10
	rs13107325	Alcohol use disorder	32451486	0.079	8.864	NA	8e-19
	rs13107325	Body mass index	31669095	NR	NA	NA	8e-39
	rs13107325	Type 2 diabetes	32541925	0.926	0.047	0.03-0.064	3e-08
	rs13107325	Alcohol consumption	31358974	0.07	0.016	0.012-0.02	1e-15
	rs13107325	High density lipoprotein cholesterol levels	33339817	NR	0.086	0.059-0.114	4e-10
	rs13107325	Alcohol use disorder (consumption score)	30336701	NR	0.01	0.0061-0.0139	3e-10
	rs13107325	Body mass index	25673413	0.071	0.045	0.028-0.062/2	3e-07
	rs13107325	Low density lipoprotein cholesterol levels	29507422	NR	0.038	NA	8e-06
	rs13107325	BMI (adjusted for smoking behaviour)	28443625	0.074	0.047	0.032-0.062/2	3e-10
	rs13107325	BMI (adjusted for smoking behaviour)	28443625	0.074	0.061	0.041-0.081/2	4e-09
	rs13107325	Total cholesterol levels	29507422	0.925	0.053	NA	1e-09
	rs13107325	Body mass index	28448500	0.075	0.07	0.047-0.092/2	1e-09
	rs13107325	Low density lipoprotein cholesterol levels	29507422	NR	0.038	NA	8e-06
	rs13107325	BMI (adjusted for smoking behaviour)	28443625	0.074	0.047	0.032-0.062/2	3e-10
	rs13107325	Body mass index	28448500	0.075	0.07	0.047-0.092/2	1e-09
	rs13107325	Body mass index	30239722	NR	0.047	0.041-0.053	4e-47
	rs61873510	Alcohol consumption	31358974	0.33	0.008	0.006-0.01	5e-13
	rs61873510	Alcohol consumption (drinks per week)	30679032	0.326	0.016	0.01-0.021	7e-09
	rs61873510	Alcohol consumption (drinks per week)	30643258	0.327	0.015	0.01-0.02	2e-10
	rs61873510	Body mass index	31669095	NR	NA	NA	3e-17
	rs61873510	Body mass index	39134668	NR	0.016	0.012-0.021	1e-13
	rs2049045	Smoking cessation (MTAG)	30643251	0.179	0.009	0.0055-0.0134	3e-06
	rs2049045	Body mass index	28448500	0.809	0.043	0.029-0.057/2	9e-10
	rs2049045	Body mass index (joint analysis main effects and physical activity interaction)	28448500	NR	NA	NA	1e-06
	rs2049045	Body mass index in physically inactive individuals	28448500	0.808	0.058	0.033-0.083	5e-06
	rs2049045	Smoking initiation (ever regular vs never regular)	30679032	0.187	0.02	0.014-0.026	1e-11
	rs2049045	Body mass index	31453325	NR	NA	NA	8e-42
	rs1558902	Body mass index	31217584	NR	0.089	0.074-0.105	4e-29
	rs1558902	Body mass index	30108127	NR	0.079	NA	2e-210
	rs1558902	Body mass index	31888951	0.385	0.563	0.34-0.78	5e-07
	rs1558902	Body mass index	25673413	0.413	0.079	0.071-0.087/2	4e-84
	rs1558902	Waist circumference	28552196	0.405	0.071	0.058-0.084	7e-27
	rs1558902	Hip circumference	28552196	0.403	0.072	0.056-0.087	8e-20
	rs1558902	BMI (adjusted for smoking behaviour)	28443625	0.403	0.071	0.062-0.079/2	5e-59
	rs1558902	Body mass index	28552196	0.406	0.084	0.072-0.097	4e-40
	rs1558902	Body mass index	28892062	0.44	0.081	0.075-0.087	2e-223
	rs1558902	Body mass index	24861553	0.15	0.076	0.062-0.089	7e-27
	rs1558902	Obesity	23563607	0.41	1.14	NA	2e-81
	rs10876168	Total cholesterol levels	33462484	NR	0.016	0.011-0.02	1e-10
	rs10876168	Low density lipoprotein cholesterol levels	33462484	NR	0.015	0.011-0.02	1e-09
	rs1004787	Smoking status (ever vs never smokers)	32231276	0.531	1.033		9e-11
	rs1004787	Alcohol consumption	31358974	0.54	0.009	0.007-0.011	7e-17
	rs1004787	Age of smoking initiation (MTAG)	30643251	0.557	0.013	0.0096-0.0154	2e-17
	rs1004787	Smoking cessation (MTAG)	30643251	0.558	0.011	0.0083-0.0144	3e-13
	rs1004787	Smoking initiation (ever regular vs never regular) (MTAG)	30643251	0.552	0.015	0.013-0.017	5e-43
	rs1004787	Smoking initiation (ever regular vs never regular)	30643251	0.552	0.028	0.023-0.033	5e-43
	rs1004787	Smoking status (ever vs never smokers)	30643258	0.53	0.018	0.013-0.022	4e-16
	rs1004787	Smoking status	30595370	NR	NA	NA	9e-19
	rs1004787	Smoking initiation	33082346	NR	0.967	NA	7e-22
	rs1004787	Smoking initiation	36477530	0.677	0.018	0.012-0.023	5e-10
	rs35247189	Cigarettes smoked per day	36477530	0.223	0.014	0.0099-0.0183	7e-11
	rs35247189	Cigarettes smoked per day	36477530	0.209	0.013	0.0096-0.0172	8e-12
	rs11692435	Smoking initiation (ever regular vs never regular) (MTAG)	30643251	0.085	0.014	0.01-0.0176	2e-12
	rs11692435	Alcohol consumption (drinks per week)	30643251	0.085	0.017	0.012-0.023	3e-11
	rs11692435	Smoking initiation (ever regular vs never regular)	30643251	0.085	0.025	0.016-0.034	4e-08
	rs11692435	Body mass index	30595370	NR	NA	NA	3e-08
	rs11692435	Alcohol consumption (drinks per week)	30643258	0.084	0.026	0.018-0.034	2e-10
	rs11692435	Smoking initiation	36477530	0.084	0.01	0.0065-0.0126	8e-10
	rs11692435	Drinks per week	36477530	0.084	0.021	0.017-0.024	9e-36
	rs11692435	Body mass index	NR	NR	0.014	0.0091-0.0185	8e-09
	rs10159545	BMI (standard GWA)	37106081	NR	0.074	0.048-0.1	2e-08
	rs6265	Caffeine consumption from coffee or tea	33287642	0.811	0.022	0.016-0.027	3e-13
	rs6265	Body mass index	31217584	NR	0.048	0.03-0.065	1e-07
	rs6265	Adult body size	32376654	0.812	0.025	0.021-0.028	2e-44
	rs6265	Body mass index	30108127	NR	0.042	NA	2e-39
	rs6265	Smoking initiation (ever regular vs never regular) (MTAG)	30643251	0.188	0.015	0.013-0.018	9e-29
	rs6265	Body mass index	29273807	0.816	0.041	0.036-0.045	3e-68
	rs6265	Age of smoking initiation (MTAG)	30643251	0.181	0.015	0.012-0.019	6e-16
	rs6265	Hip circumference	25673412	0.193	0.032	0.02-0.044	4e-07
	rs6265	Body mass index	28892062	0.2	0.04	0.034-0.046	2e-51
	rs6265	Body mass index	30239722	0.184	0.041	0.037-0.045	7e-89
	rs6265	Body mass index	30595370	NR	NA	NA	8e-61
	rs6265	Coffee consumption	31959922	NR	0.054	0.032-0.076	3e-06
	rs6265	Body mass index	19079260	0.85	4.58	3.07-6.09%	5e-10
	rs6265	Body mass index	39134668	NR	0.04	0.034-0.045	9e-51
	rs4759228	Adult body size	32376654	0.705	0.012	0.0087-0.0146	1e-14
	rs4759228	Body mass index	30595370	NR	NA	NA	1e-16
	rs4759228	BMI and adiposity (confirmatory factor analysis Factor 7)	38965376	NR	NA	NA	3e-08
	rs4759228	Body mass index	34594039	NR	0.02	0.015-0.025	2e-15
	rs4759228	Body mass index	38538606	NR	0.016	0.011-0.021	6e-10
	rs113230003	Body mass index	31669095	NR	NA	NA	3e-20
	rs113230003	Adult body size	32376654	0.739	0.013	0.0095-0.0157	1e-15
	rs113230003	Smoking initiation (ever regular vs never regular)	30643251	0.255	0.019	0.013-0.025	1e-10
	rs113230003	Coronary artery disease	29212778	0.269	0.033	0.019-0.047	6e-06
	rs113230003	Body mass index	30595370	NR	NA	NA	4e-20
	rs113230003	Cardiovascular disease	30595370	NR	NA	NA	2e-08
	rs113230003	Body mass index	39134668	NR	0.021	0.016-0.025	1e-18
	rs113230003	Body mass index	38538606	NR	0.018	0.013-0.024	3e-11
	rs12151152	Body mass index	30239722	0.409	0.021	0.017-0.025	7e-27
	rs12151152	Body mass index	31669095	NR	NA	NA	2e-29
	rs61934664	Problematic alcohol use (MTAG)	32451486	0.495	0.013	0.0094-0.0174	7e-11
	rs61934664	Alcohol consumption (drinks per week) (MTAG)	32451486	0.476	0.011	0.008-0.0147	4e-11
	rs28929474	Drinks per week	36477530	0.018	0.03	0.023-0.036	2e-18
	rs28929474	C-reactive protein levels (MTAG)	36376304	NR	0.091	0.076-0.105	4e-34
	rs28929474	Alcohol frequency weekly (standard GWA)	37106081	NR	0.514	0.34-0.69	9e-09
	rs28929474	Alcohol consumption (drinks per week)	30679032	0.02	0.057	0.04-0.073	2e-11
	rs28929474	Alcohol consumption (drinks per week)	30643251	0.018	0.037	0.026-0.047	1e-11
	rs28929474	Total cholesterol levels in LDL	38448586	0.02	0.146	0.12-0.18	6e-22
	rs28929474	Low density lipoprotein cholesterol levels	29083408	NR	0.072	0.057-0.086	1e-21
	rs28929474	Alcohol consumption (drinks per week)	30643258	0.02	0.049	0.033-0.065	7e-10
	rs28929474	Alcohol consumption (drinks per week) (MTAG)	32451486	0.015	0.054	0.04-0.068	2e-14
	rs2472297	Coffee consumption (cups per day)	25288136	0.24	0.14	0.12-0.16	2e-24
	rs2472297	Coffee consumption	21357676	0.265	0.31	0.17-0.44	5e-14
	rs2472297	Coffee consumption (cups per day)	31837886	0.272	0.136	NA	2e-95
	rs2472297	Alcohol consumption (drinks per week)	30643251	0.249	0.011	0.0073-0.0139	3e-10
	rs2472297	Alcohol consumption (drinks per week) (MTAG)	30643251	0.249	0.01	0.007-0.013	9e-11
	rs2472297	Coffee consumption	31046077	0.264	0.045	0.041-0.048	9e-157
	rs2472297	Caffeine consumption from tea	33287642	0.733	0.054	0.049-0.059	3e-102
	rs2472297	Caffeine consumption from coffee	33287642	0.732	0.065	0.06-0.07	3e-140
	rs2472297	Caffeine consumption from coffee or tea	33287642	0.732	0.105	0.1-0.11	0
	rs2472297	Alcohol consumption (drinks per week) (MTAG)	32451486	0.206	0.012	0.0078-0.0162	3e-08
	rs2472297	Tea consumption	35653391	NR	0.017	0.015-0.02	2e-36
	rs2472297	Caffeine levels	35347128	NR	0.25	NA	1e-32
	rs2472297	Body mass index	36581621	NR	0.01	0.0073-0.0131	2e-11
	rs2472297	Body mass index	37280435	NR	0.014	0.0098-0.0184	1e-10
	rs1104608	Alcohol consumption (drinks per week)	30643251	0.425	0.011	0.0081-0.0139	1e-13
	rs1104608	Alcohol consumption (drinks per week) (MTAG)	30643251	0.425	0.009	0.0068-0.0122	3e-12
	rs1104608	Alcohol consumption	31358974	0.43	0.008	0.006-0.01	1e-14
	rs1104608	Alcohol consumption (drinks per week)	30679032	0.426	0.016	0.011-0.021	2e-10
	rs1104608	Relative carbohydrate intake	34426670	0.428	0.161	0.11-0.21	2e-11
	rs1104608	Dietary macronutrient intake (multi-trait analysis)	34426670	0.806	NA	NA	4e-09
	rs1104608	Drinks per week	36477530	0.18	0.014	0.012-0.016	1e-35
	rs1104608	Tea consumption	31046077	0.431	0.007	0.0044-0.0102	2e-06
	rs10510554	Body mass index	28448500	0.571	0.023	0.015-0.03/2	2e-09
	rs10510554	Body mass index	28892062	0.56	0.016	0.012-0.02	3e-12
	rs10510554	Body mass index in physically inactive individuals	28448500	0.55	0.037	0.023-0.051	5e-07
	rs10510554	Body mass index in physically active individuals	28448500	0.561	0.019	0.011-0.027/2	2e-06
	rs10510554	Relative carbohydrate intake	32393786	NR	0.019	0.013-0.025	2e-12
	rs10510554	Body mass index	26426971	0.424	0.018	NA	8e-11
	rs7619139	Body mass index	30595370	NR	NA	NA	3e-140
	rs7619139	Body mass index (joint analysis main effects and physical activity interaction)	28448500	NR	NA	NA	3e-08
	rs7619139	BMI and adiposity (confirmatory factor analysis Factor 7)	38965376	NR	NA	NA	4e-10
	rs7619139	Body mass index	31669095	NR	NA	NA	9e-14
	rs7619139	Relative sugar intake	32393786	NR	0.024	0.018-0.03	4e-16
	rs7619139	Relative carbohydrate intake	34426670	0.588	0.167	0.12-0.21	2e-12
	rs7619139	Dietary macronutrient intake (multi-trait analysis)	34426670	0.588	NA	NA	6e-21
	rs7619139	Body mass index	37280435	NR	0.014	0.01-0.0176	8e-13
	rs1229984	Alcohol consumption	23743675	0.03	NA	NA	2e-08
	rs1229984	Alcohol dependence	23456092	NR	2.35	1.95-2.84	3e-21
	rs1229984	Body mass index	30595370	NR	NA	NA	1e-12
	rs1229984	Cardiovascular disease	30595370	NR	NA	NA	8e-15
	rs1229984	Alcohol use disorder (consumption score)	30336701	NR	0.05	0.044-0.056	4e-56
	rs1229984	Alcohol use disorder	30940813	0.97	1.742	1.68-1.8	5e-74
	rs1229984	Low density lipoprotein cholesterol levels	33462484	NR	0.077	0.062-0.093	3e-23
	rs1229984	Body mass index	34594039	NR	0.029	0.022-0.036	5e-17
	rs1229984	Alcohol use disorder	35094024	NR	NA	NA	3e-17
	rs1229984	Alcohol consumption (drinks per week)	30679032	0.98	0.246	0.23-0.26	2e-173
	rs1229984	LDL cholesterol levels	32203549	0.027	0.053	0.04-0.065	7e-17
	rs1229984	Relative fat intake	32393786	NR	0.098	0.08-0.116	1e-28
	rs1229984	Relative protein intake	32393786	NR	0.044	0.026-0.062	9e-07
	rs55872725	Body mass index	28270201	0.395	0.104	0.083-0.126/2	6e-21
	rs55872725	Type 2 diabetes	35551307	0.418	0.122	0.11-0.14	9e-79
	rs55872725	Alcohol use disorder (consumption score)	37282553	0.335	9.422	NA	4e-21
	rs55872725	Body mass index or osteoarthritis (pleiotropy)	36889626	NR	NA	NA	0
	rs55872725	Body fat percentage	28270201	0.395	0.643	0.49-0.80%	6e-16
	rs55872725	Alcohol consumption (heavy vs. light/non-drinkers)	31998841	0.599	5.305	NA	1e-07
	rs55872725	Sugar-sweetened beverage consumption	31046077	0.591	0.009	0.0071-0.0119	2e-15
	rs55872725	Sweet beverage consumption	31046077	0.592	0.009	0.005-0.012	3e-06

## Sheet: Table S5
	Table S5.Estimates of genetical liability to air pollutants and lifestyle factors in univaribale mendelian randomization*
	Stage	Exposure	outcome	IVs	Inverse variance weighted			Weighted median method			MR-Egger regression			Contamination mixture method		Cochran's Q	Cochran's Q test, P value	P_intecept	MR-PRESSO Global Test P
					OR（95% CI）	P		OR (95% CI)	P		OR (95% CI)	P		OR (95% CI)	P
	Discovery-analysis	Air pollution
		PM2.5	Metabolic syndrome	12	1.32(1.16,1.51)	2.35e-05		1.34(1.15,1.56)	0.000164533		1.43(0.75,2.71)	0.302496		1.48(0.75,2.94)	0.000164533	16.1371	0.136115	0.817492	0.187(raw, 0 outliers)
		PM10	Metabolic syndrome	56	0.94(0.87,1.02)	0.125367		0.94(0.86,1.03)	0.186238		1.10(0.86,1.42)	0.44074		0.76(0.31,1.84)	0.135992	115.203	<0.001	0.195608	<0.001(raw, 0 outliers)
		NO2	Metabolic syndrome	32	0.94(0.83,1.08)	0.388243		0.88(0.78,0.99)	0.0280846		1.18(0.74,1.89)	0.48943		0.77(0.24,2.41)	0.00199768	104.543	<0.001	0.333981	<0.001(raw, 3 outliers)
		NOx	Metabolic syndrome	26	1.14(1.03,1.27)	0.0116489		1.13(1.00,1.28)	0.0490453		1.00(0.67,1.50)	0.990756		1.36(0.63,2.96)	0.00479152	44.4337	0.00969456	0.521252	0.009(raw, 0 outliers)
		Lifestyle factor
		Leisure screen time	Metabolic syndrome	95	1.20(1.16,1.25)	4.7187e-25		1.17(1.13,1.21)	7.88143e-16		1.18(0.98,1.41)	0.0839189		1.35(0.80,2.26)	5.80203e-18	241.061	<0.001	0.787484	<0.001(raw, 1 outliers)
		MVPA	Metabolic syndrome	30	0.78(0.72,0.84)	2.52322e-10		0.82(0.75,0.89)	2.51925e-06		0.93(0.62,1.39)	0.726587		0.68(0.36,1.28)	1.58196e-07	82.0467	<0.001	0.381516	<0.001(raw, 0 outliers)
		Sedentary commuting	Metabolic syndrome	4	1.06(0.94,1.18)	0.345471		1.07(0.99,1.17)	0.10497		0.94(0.66,1.32)	0.740793		1.12(0.80,1.55)	0.0431182	10.1327	0.0174715	0.536407	0.067(raw, 0 outliers)
		Smoking initiation	Metabolic syndrome	82	1.16(1.12,1.20)	3.45521e-14		1.13(1.09,1.18)	6.96191e-10		1.05(0.85,1.29)	0.644474		1.32(0.78,2.24)	2.27526e-13	225.284	<0.001	0.340458	<0.001(raw, 1 outliers)
		Alcoholic drinks per week	Metabolic syndrome	27	0.98(0.85,1.13)	0.773032		1.02(0.90,1.17)	0.713862		1.39(0.63,3.07)	0.42208		1.25(0.40,3.90)	0.074235	79.9452	<0.001	0.386617	<0.001(raw, 2 outliers)
		Coffee intake	Metabolic syndrome	34	1.31(1.19,1.44)	1.71605e-08		1.37(1.24,1.52)	1.36164e-09		1.49(1.24,1.79)	0.000182718		1.39(0.50,3.82)	0.000326807	66.4546	0.000492821	0.122797	<0.001(raw, 0 outliers)
		Relative carbohydrate intake	Metabolic syndrome	16	1.03(0.95,1.11)	0.523609		1.11(1.01,1.23)	0.0377991		1.23(0.95,1.59)	0.141621		1.10(0.67,1.81)	0.017178	21.1098	0.133357	0.176003	0.146(raw, 0 outliers)
		Relative fat intake	Metabolic syndrome	13	1.09(0.97,1.22)	0.135652		1.07(0.94,1.22)	0.310591		1.00(0.63,1.60)	0.995753		1.22(0.67,2.24)	0.022063	19.5885	0.0752821	0.725981	0.11(raw, 0 outliers)
		Relative protein intake	Metabolic syndrome	12	1.12(0.90,1.38)	0.305103		1.09(0.95,1.25)	0.22309		1.30(0.55,3.09)	0.567725		1.12(0.39,3.23)	0.0563472	75.1403	<0.001	0.731131	<0.001(raw, 4 outliers)
		Relative sugar intake	Metabolic syndrome	8	1.00(0.89,1.14)	0.962501		1.05(0.93,1.19)	0.409826		1.36(0.84,2.22)	0.259533		1.09(0.63,1.88)	0.368102	14.3362	0.0455143	0.250466	0.072(raw, 0 outliers)
	Replication-analysis	Air pollution
		PM2.5	Metabolic syndrome	48	1.24(1.00,1.55)	0.0542013		1.20(0.92,1.56)	0.171574		0.99(0.51,1.90)	0.974723		1.17(0.11,12.48)	0.259447	78.2208	0.00285741	0.469858	0.001(raw, 1 outliers)
		PM10	Metabolic syndrome	186	1.02(0.91,1.13)	0.798963		1.00(0.86,1.16)	0.998971		1.19(0.91,1.56)	0.215023		1.21(0.12,12.11)	0.0692483	252.389	0.000725898	0.213301	0.001(raw, 1 outliers)
		NO2	Metabolic syndrome	83	0.98(0.83,1.15)	0.776374		0.97(0.79,1.19)	0.769938		1.21(0.79,1.87)	0.38616		1.18(0.11,12.55)	0.258114	115.644	0.00852625	0.290127	0.009(raw, 0 outliers)
		NOx	Metabolic syndrome	55	1.09(0.93,1.29)	0.28707		1.08(0.86,1.36)	0.487056		0.85(0.52,1.40)	0.526385		1.21(0.22,6.68)	0.114499	40.5253	0.912747	0.296193	0.863(raw, 0 outliers)
		Lifestyle factor
		Leisure screen time	Metabolic syndrome	256	1.48(1.40,1.56)	1.99669e-45		1.44(1.35,1.54)	4.53926e-29		1.58(1.27,1.98)	5.98352e-05		1.86(0.48,7.29)	1.16984e-31	481.075	<0.001	0.541751	<0.001(raw, 2 outliers)
		MVPA	Metabolic syndrome	102	0.66(0.60,0.73)	9.28948e-17		0.77(0.69,0.86)	6.75021e-06		0.94(0.71,1.26)	0.699886		0.42(0.09,1.85)	7.7039e-07	218.04	<0.001	0.0124268	<0.001(raw, 1 outliers)
		Sedentary commuting	Metabolic syndrome	12	1.10(0.95,1.28)	0.205133		1.06(0.90,1.23)	0.49587		1.32(0.91,1.90)	0.171979		0.95(0.43,2.11)	0.364342	26.2506	0.00595488	0.322632	0.006(raw, 0 outliers)
		Smoking initiation	Metabolic syndrome	190	1.30(1.22,1.39)	7.44931e-15		1.27(1.17,1.38)	9.22939e-09		1.18(0.88,1.58)	0.262464		1.81(0.43,7.66)	1.13069e-13	384.153	<0.001	0.499029	<0.001(raw, 0 outliers)
		Alcoholic drinks per week	Metabolic syndrome	95	0.85(0.71,1.01)	0.0670289		0.95(0.77,1.17)	0.601627		1.83(1.07,3.12)	0.0290663		1.13(0.07,17.72)	0.4958	201.02	<0.001	0.00351191	<0.001(raw, 0 outliers)
		Coffee intake	Metabolic syndrome	92	1.43(1.16,1.76)	0.000903421		1.68(1.33,2.12)	1.71242e-05		2.18(1.31,3.63)	0.00370049		2.08(0.07,62.40)	7.43107e-05	655.741	<0.001	0.0796552	<0.001(raw, 2 outliers)
		Relative carbohydrate intake	Metabolic syndrome	34	1.18(0.96,1.44)	0.110533		1.09(0.85,1.38)	0.499131		1.37(0.72,2.62)	0.339319		1.01(0.18,5.78)	1	54.9931	0.01	0.620758	0.015(raw, 0 outliers)
		Relative fat intake	Metabolic syndrome	22	0.86(0.67,1.10)	0.219727		0.84(0.62,1.12)	0.231417		1.08(0.51,2.30)	0.83655		0.75(0.12,4.91)	0.221032	36.6186	0.0186118	0.527624	0.024(raw, 0 outliers)
		Relative protein intake	Metabolic syndrome	28	1.00(0.85,1.18)	0.991113		0.90(0.72,1.14)	0.390341		0.65(0.42,1.02)	0.0731625		0.84(0.58,1.22)	0.373776	28.2717	0.39707	0.0558064	0.322(raw, 0 outliers)
		Relative sugar intake	Metabolic syndrome	28	0.84(0.69,1.02)	0.0761339		0.87(0.68,1.11)	0.274981		1.15(0.62,2.15)	0.653546		0.57(0.11,2.90)	0.0235903	42.4717	0.0295552	0.296967	0.037(raw, 0 outliers)
	IVs, instrumental variables; OR, odd ratio; CI, condifence interval; MR, Mendelian randomization; MR-PRESSO, Mendelian Randomization Pleiotropy RESidual Sum and Outlier; MVPA, moderate-to-vigorous intensity physical activity during leisure time;

## Sheet: Table S6
	Table S6.Estimates of genetical liability to air pollutants and lifestyle factors on hypertension in univaribale mendelian randomization*
	Stage	Exposure	outcome	IVs	Inverse variance weighted method			Weighted median method			MR-Egger regression			Contamination mixture method		Cochran's Q	Cochran's Q test, P value	P_intecept	MR-PRESSO Global Test P
					OR (95% CI)	P value		OR (95% CI)	P value		OR (95% CI)	P value		OR (95% CI)	P value
	Discovery-analysis	Air pollution
		PM2.5	Hypertension	45	1.19(1.04,1.36)	0.00965315		1.19(0.95,1.48)	0.129163		1.12(0.90,1.38)	0.317876		1.23(0.15,10.14)	0.0771526	45.5753	0.406368	0.437395	0.491(raw, 0 outliers)
		PM10	Hypertension	194	0.94(0.85,1.02)	0.148964		0.99(0.83,1.17)	0.902898		1.01(0.85,1.19)	0.938567		0.93(0.09,9.78)	0.278208	279.171	<0.001	0.303347	<0.001(raw, 0 outliers)
		NO2	Hypertension	70	1.01(0.90,1.13)	0.887668		1.13(0.94,1.35)	0.200162		1.20(0.99,1.45)	0.0659686		1.00(0.15,6.63)	1	73.5263	0.332263	0.0298558	0.315(raw, 0 outliers)
		NOx	Hypertension	59	0.92(0.81,1.05)	0.222221		0.93(0.78,1.12)	0.470178		0.92(0.75,1.14)	0.472665		0.98(0.15,6.60)	0.800486	72.521	0.095013	0.997775	0.101(raw, 0 outliers)
		Lifestyle factor
		Leisure screen time	Hypertension	232	1.15(1.10,1.21)	3.03719e-08		1.14(1.07,1.21)	9.21055e-05		1.13(0.92,1.39)	0.231419		1.18(0.20,6.83)	6.9098e-05	406.964	<0.001	0.872011	<0.001(raw, 1 outliers)
		MVPA	Hypertension	92	0.83(0.76,0.90)	2.23408e-05		0.85(0.77,0.94)	0.00166115		0.88(0.67,1.17)	0.384646		0.73(0.19,2.74)	0.000263561	167.856	<0.001	0.641747	<0.001(raw, 0 outliers)
		Sedentary commuting	Hypertension	9	0.92(0.82,1.03)	0.171365		0.90(0.78,1.04)	0.167547		0.80(0.60,1.07)	0.178231		0.89(0.61,1.29)	0.0683065	4.37016	0.822278	0.33085	0.826(raw, 0 outliers)
		Smoking initiation	Hypertension	182	1.19(1.12,1.27)	3.99122e-08		1.10(1.02,1.19)	0.00920722		1.09(0.86,1.39)	0.476655		1.18(0.31,4.53)	0.0157726	367.251	<0.001	0.478918	<0.001(raw, 2 outliers)
		Alcoholic drinks per week	Hypertension	82	1.09(0.96,1.24)	0.177411		1.16(0.96,1.39)	0.126735		1.42(0.91,2.21)	0.125529		1.40(0.23,8.61)	0.00525824	79.8199	0.516233	0.22877	0.491(raw, 0 outliers)
		Coffee intake	Hypertension	95	1.07(0.90,1.27)	0.419024		1.04(0.84,1.27)	0.733339		1.06(0.74,1.52)	0.733795		1.02(0.05,20.49)	0.770221	204.636	<0.001	0.960462	<0.001(raw, 1 outliers)
		Relative carbohydrate intake	Hypertension	33	0.91(0.76,1.08)	0.280456		0.90(0.73,1.12)	0.340379		0.98(0.62,1.56)	0.945778		0.74(0.16,3.51)	0.402578	70.132	<0.001	0.711241	0.002(raw, 0 outliers)
		Relative fat intake	Hypertension	26	1.00(0.82,1.21)	0.97508		1.06(0.84,1.34)	0.606604		0.89(0.55,1.46)	0.658189		1.27(0.27,5.88)	0.115022	41.3661	0.0210024	0.639899	0.035(raw, 0 outliers)
		Relative protein intake	Hypertension	26	1.01(0.85,1.20)	0.892076		0.87(0.70,1.09)	0.229264		0.79(0.52,1.21)	0.294612		0.78(0.55,1.11)	0.1732	35.535	0.078958	0.229092	0.078(raw, 0 outliers)
		Relative sugar intake	Hypertension	27	0.99(0.86,1.15)	0.922831		1.06(0.87,1.27)	0.571013		1.32(0.86,2.04)	0.219231		1.09(0.32,3.75)	0.224543	30.7059	0.239406	0.182748	0.12(raw, 0 outliers)
	Replication-analysis	Air pollution
		PM2.5	Hypertension	47	1.04(1.00,1.07)	0.0272191		1.02(0.99,1.06)	0.211821		0.97(0.90,1.05)	0.453298		1.12(0.81,1.54)	0.00606149	77.7255	0.00238299	0.0826385	0.004(raw, 0 outliers)
		PM10	Hypertension	199	0.99(0.97,1.00)	0.0845407		0.99(0.97,1.01)	0.219414		0.99(0.95,1.03)	0.567536		0.96(0.69,1.33)	0.0592541	295.637	<0.001	0.850545	<0.001(raw, 1 outliers)
		NO2	Hypertension	84	0.99(0.96,1.01)	0.351892		0.98(0.95,1.01)	0.187026		1.01(0.95,1.08)	0.683742		0.96(0.68,1.36)	0.00217243	157.896	<0.001	0.37897	<0.001(raw, 0 outliers)
		NOx	Hypertension	54	0.98(0.96,1.00)	0.120403		0.98(0.95,1.01)	0.265971		0.93(0.87,0.98)	0.0161009		0.94(0.72,1.24)	0.0775631	53.5527	0.452936	0.0464868	0.347(raw, 0 outliers)
		Lifestyle factor
		Leisure screen time	Hypertension	245	1.04(1.03,1.05)	1.93142e-18		1.03(1.02,1.04)	7.18327e-12		1.02(0.99,1.06)	0.158134		1.04(0.85,1.28)	2.55115e-13	550.914	<0.001	0.400846	<0.001(raw, 7 outliers)
		MVPA	Hypertension	90	0.96(0.95,0.98)	6.7319e-08		0.97(0.95,0.98)	8.06871e-05		0.98(0.94,1.02)	0.398554		0.95(0.78,1.16)	3.4171e-06	169.853	<0.001	0.331503	<0.001(raw, 0 outliers)
		Sedentary commuting	Hypertension	12	1.01(0.99,1.03)	0.192419		1.00(0.98,1.03)	0.641023		1.04(1.00,1.07)	0.0832891		0.99(0.91,1.09)	0.503709	18.67	0.0672812	0.177199	0.117(raw, 0 outliers)
		Smoking initiation	Hypertension	172	1.01(1.00,1.02)	0.00234007		1.01(1.00,1.02)	0.0184981		0.98(0.94,1.02)	0.24081		1.05(0.86,1.28)	1.22181e-07	343.033	<0.001	0.0508071	<0.001(raw, 2 outliers)
		Alcoholic drinks per week	Hypertension	91	1.02(0.99,1.05)	0.134068		1.00(0.97,1.03)	0.813385		1.03(0.96,1.12)	0.392485		0.96(0.63,1.45)	0.197754	218.939	<0.001	0.710197	<0.001(raw, 1 outliers)
		Coffee intake	Hypertension	88	1.00(0.97,1.04)	0.782977		1.02(0.98,1.05)	0.400036		1.09(0.98,1.21)	0.109025		0.98(0.62,1.54)	0.239509	184.563	<0.001	0.111312	<0.001(raw, 1 outliers)
		Relative carbohydrate intake	Hypertension	28	1.00(0.97,1.02)	0.815192		0.99(0.96,1.03)	0.617677		0.99(0.93,1.05)	0.70596		1.01(0.86,1.20)	0.420445	21.474	0.7636	0.752958	0.011(raw, 0 outliers)
		Relative fat intake	Hypertension	20	1.00(0.97,1.03)	0.796362		1.02(0.98,1.06)	0.437559		1.01(0.92,1.10)	0.872749		1.02(0.81,1.28)	0.41828	21.4211	0.314006	0.787933	0.162(raw, 0 outliers)
		Relative protein intake	Hypertension	30	1.00(0.97,1.02)	0.802588		0.99(0.96,1.02)	0.538343		1.02(0.96,1.08)	0.541196		0.96(0.89,1.03)	0.249893	30.7052	0.379454	0.445459	0.464(raw, 0 outliers)
		Relative sugar intake	Hypertension	18	0.97(0.94,1.00)	0.0590593		0.95(0.91,0.98)	0.00525965		0.99(0.89,1.11)	0.895331		0.90(0.68,1.19)	0.000337157	18.5021	0.357845	0.218096	0.382(raw, 0 outliers)
	IVs, instrumental variables; OR, odd ratio; CI, condifence interval; MR, Mendelian randomization; MR-PRESSO, Mendelian Randomization Pleiotropy RESidual Sum and Outlier; MVPA, moderate-to-vigorous intensity physical activity during leisure time;

## Sheet: Table S7
	Table S7.Estimates of genetical liability to air pollutants and lifestyle factors on waist circumference in univaribale mendelian randomization*
	Stage	Exposure	outcome	IVs	Inverse variance weighted method			Weighted median method			MR-Egger regression			Contamination mixture method		Cochran's Q	Cochran's Q test, P value	P_intecept	MR-PRESSO Global Test P
					OR (95% CI)	P value		OR (95% CI)	P value		OR (95% CI)	P value		OR (95% CI)	P value
	Discovery-analysis	Air pollution
		PM2.5	Waist circumference	23	1.15(0.97,1.36)	0.0994176		1.20(0.96,1.51)	0.107207		1.61(0.66,3.92)	0.304491		1.26(0.39,4.06)	0.0904787	24.1111	0.341434	0.456941	0.421(raw, 0 outliers)
		PM10	Waist circumference	86	0.96(0.88,1.05)	0.385121		1.01(0.87,1.16)	0.939514		1.27(0.93,1.74)	0.139727		0.98(0.29,3.28)	0.861443	70.6021	0.869004	0.0712306	0.913(raw, 0 outliers)
		NO2	Waist circumference	44	1.05(0.91,1.21)	0.480503		1.07(0.88,1.29)	0.502847		1.21(0.71,2.05)	0.494536		1.01(0.25,4.03)	0.935437	55.7044	0.0926318	0.606501	0.115(raw, 0 outliers)
		NOx	Waist circumference	34	1.17(1.01,1.35)	0.0380777		1.08(0.87,1.34)	0.482331		1.63(0.85,3.10)	0.149545		1.00(0.30,3.33)	0.950203	35.2963	0.360144	0.310636	0.469(raw, 0 outliers)
		Lifestyle factor
		Leisure screen time	Waist circumference	202	1.14(1.10,1.18)	1.62891e-12		1.12(1.07,1.17)	1.38135e-06		1.14(0.97,1.34)	0.109654		1.20(0.54,2.67)	1.73e-06	296.35	<0.001	0.966135	<0.001(raw, 0 outliers)
		MVPA	Waist circumference	72	0.87(0.82,0.92)	1.91148e-06		0.86(0.80,0.94)	0.000370325		0.97(0.77,1.24)	0.834684		0.81(0.39,1.68)	7.7e-05	87.0023	0.095354	0.338497	0.064(raw, 0 outliers)
		Sedentary commuting	Waist circumference	5	0.94(0.82,1.09)	0.422914		0.88(0.76,1.03)	0.115712		0.83(0.42,1.62)	0.615566		0.87(0.56,1.35)	0.0301642	6.6612	0.154912	0.714964	0.268(raw, 0 outliers)
		Smoking initiation	Waist circumference	151	1.11(1.06,1.15)	2.95225e-06		1.09(1.04,1.15)	0.000670549		1.26(1.03,1.55)	0.027279		1.14(0.49,2.64)	0.000601706	222.372	0.000113885	0.197189	<0.001(raw, 2 outliers)
		Alcoholic drinks per week	Waist circumference	68	0.95(0.83,1.08)	0.430989		1.01(0.84,1.21)	0.926351		1.44(0.93,2.22)	0.104943		0.63(0.10,3.91)	0.00113027	153.52	<0.001	0.0512582	<0.001(raw, 0 outliers)
		Coffee intake	Waist circumference	58	1.25(1.11,1.42)	0.000457565		1.18(0.97,1.44)	0.105426		1.25(0.92,1.70)	0.161984		1.80(0.33,9.97)	3.03e-05	76.5819	0.0428102	0.973338	0.051(raw, 0 outliers)
		Relative carbohydrate intake	Waist circumference	22	0.82(0.72,0.94)	0.00430672		0.84(0.70,1.01)	0.0691415		0.70(0.38,1.28)	0.261103		0.77(0.30,1.95)	0.322817	24.9286	0.250268	0.602284	0.223(raw, 0 outliers)
		Relative fat intake	Waist circumference	16	1.15(0.98,1.34)	0.0894116		1.20(0.97,1.49)	0.0890454		1.07(0.64,1.81)	0.796312		1.09(0.30,4.04)	0.316301	16.0239	0.380466	0.798966	0.032(raw, 0 outliers)
		Relative protein intake	Waist circumference	22	1.16(0.96,1.40)	0.118744		1.08(0.91,1.29)	0.374228		1.15(0.58,2.27)	0.688386		1.19(0.33,4.33)	0.249319	56.5508	4.18715e-05	0.977617	<0.001(raw, 3 outliers)
		Relative sugar intake	Waist circumference	18	0.52(0.29,0.93)	0.0284914		0.87(0.71,1.07)	0.183483		0.16(0.01,2.38)	0.200867		0.86(0.07,10.82)	0.0673601	359.275	<0.001	0.388557	<0.001(raw, 1 outliers)
	Replication-analysis	Air pollution
		PM2.5	Waist circumference	44	1.10(1.02,1.20)	0.0133488		1.04(0.96,1.13)	0.350139		0.99(0.81,1.21)	0.953196		1.04(0.47,2.32)	0.485534	111.651	<0.001	0.260911	<0.001(raw, 3 outliers)
		PM10	Waist circumference	192	1.02(0.99,1.06)	0.210253		1.02(0.98,1.06)	0.321384		1.09(1.01,1.18)	0.0284359		1.07(0.52,2.18)	0.0247494	344.464	<0.001	0.0673438	<0.001(raw, 0 outliers)
		NO2	Waist circumference	90	1.00(0.93,1.06)	0.920021		0.99(0.94,1.06)	0.852308		1.14(0.98,1.33)	0.102856		0.99(0.40,2.46)	0.752465	278.041	<0.001	0.0653267	<0.001(raw, 6 outliers)
		NOx	Waist circumference	48	1.08(1.03,1.13)	0.0030618		1.08(1.00,1.16)	0.0405933		0.97(0.85,1.10)	0.618992		1.17(0.73,1.88)	0.00366094	40.2769	0.745333	0.0745256	0.831(raw, 0 outliers)
		Lifestyle factor
		Leisure screen time	Waist circumference	183	1.21(1.19,1.23)	2.45474e-144		1.18(1.15,1.20)	1.48521e-49		1.16(1.09,1.23)	5.29e-06		1.26(0.93,1.71)	3.46e-65	225.439	0.015713	0.188186	0.316(raw, 0 outliers)
		MVPA	Waist circumference	87	0.86(0.83,0.89)	2.61994e-15		0.88(0.84,0.91)	6.73693e-12		0.97(0.87,1.08)	0.536641		0.78(0.46,1.34)	1.93e-12	292.773	<0.001	0.0308255	<0.001(raw, 3 outliers)
		Sedentary commuting	Waist circumference	12	1.05(1.01,1.08)	0.00737378		1.05(1.01,1.10)	0.0110632		1.10(1.02,1.18)	0.0372851		1.09(0.92,1.29)	0.0028867	17.3658	0.0975103	0.211737	0.05(raw, 0 outliers)
		Smoking initiation	Waist circumference	165	1.15(1.12,1.18)	6.57785e-28		1.13(1.10,1.16)	3.40169e-18		1.11(1.00,1.24)	0.0551662		1.30(0.79,2.12)	2.46e-22	517.52	<0.001	0.596116	<0.001(raw, 4 outliers)
		Alcoholic drinks per week	Waist circumference	82	0.99(0.92,1.06)	0.712761		1.02(0.95,1.09)	0.571242		1.13(0.93,1.38)	0.229443		0.76(0.29,1.96)	0.0338447	274.394	<0.001	0.1618	<0.001(raw, 0 outliers)
		Coffee intake	Waist circumference	79	1.29(1.19,1.40)	1.26091e-09		1.20(1.10,1.30)	2.41113e-05		1.48(1.13,1.94)	0.00606662		1.31(0.43,4.04)	0.00440238	257.447	<0.001	0.296924	<0.001(raw, 3 outliers)
		Relative carbohydrate intake	Waist circumference	24	0.92(0.87,0.97)	0.00387339		0.92(0.85,0.99)	0.0208528		0.96(0.82,1.12)	0.593674		0.93(0.60,1.44)	0.0691052	27.9206	0.218799	0.594704	0.259(raw, 0 outliers)
		Relative fat intake	Waist circumference	21	1.05(0.98,1.13)	0.189878		1.08(0.99,1.18)	0.0741493		1.07(0.87,1.32)	0.506736		1.18(0.67,2.09)	0.0155898	41.9696	0.00279092	0.827118	0.002(raw, 0 outliers)
		Relative protein intake	Waist circumference	27	1.04(0.98,1.11)	0.233659		1.02(0.95,1.10)	0.54003		0.93(0.80,1.08)	0.349011		1.10(0.67,1.84)	0.121549	55.7417	0.000609309	0.117921	0.002(raw, 0 outliers)
		Relative sugar intake	Waist circumference	22	0.95(0.90,1.01)	0.0869118		0.93(0.87,1.00)	0.0490714		0.90(0.76,1.07)	0.238476		0.91(0.82,1.07)	0.103335	27.1065	0.167357	0.481831	0.171(raw, 0 outliers)
	IVs, instrumental variables; OR, odd ratio; CI, condifence interval; MR, Mendelian randomization; MR-PRESSO, Mendelian Randomization Pleiotropy RESidual Sum and Outlier; MVPA, moderate-to-vigorous intensity physical activity during leisure time;

## Sheet: Table S8
	Table S9.Estimates of genetical liability to air pollutants and lifestyle factors on HDL cholesterol in univaribale mendelian randomization*
	Stage	Exposure	outcome	IVs	Inverse variance weighted method			Weighted median method			MR-Egger regression			Contamination mixture method		Cochran's Q	Cochran's Q test, P value	P_intecept	MR-PRESSO Global Test P
					OR (95% CI)	P value		OR (95% CI)	P value		OR (95% CI)	P value		OR	P value
	Discovery-analysis	Air pollution
		PM2.5	HDL cholesterol	25	0.93(0.78,1.09)	0.362125		1.02(0.80,1.29)	0.881495		0.80(0.38,1.69)	0.570068		0.96(0.29,3.18)	0.641303	21.4911	0.60961	0.705384	0.592(raw, 0 outliers)
		PM10	HDL cholesterol	89	1.01(0.90,1.13)	0.890779		1.01(0.86,1.19)	0.873938		0.72(0.48,1.06)	0.10266		0.89(0.17,4.50)	0.139079	126.52	0.0311692	0.0810357	0.028(raw, 0 outliers)
		NO2	HDL cholesterol	44	1.10(0.96,1.27)	0.165381		1.10(0.90,1.34)	0.334518		0.85(0.53,1.37)	0.516012		1.06(0.27,4.18)	0.665183	40.3126	0.588508	0.273754	0.511(raw, 0 outliers)
		NOx	HDL cholesterol	36	0.95(0.80,1.12)	0.542233		1.04(0.83,1.31)	0.718874		1.13(0.56,2.28)	0.733978		1.19(0.24,5.79)	0.148456	42.6701	0.174725	0.618606	0.151(raw, 0 outliers)
		Lifestyle factor
		Leisure screen time	HDL cholesterol	193	0.90(0.87,0.94)	5.77278e-07		0.89(0.85,0.94)	2.27e-05		0.92(0.77,1.10)	0.341834		0.82(0.35,1.92)	8.38e-08	266.835	<0.001	0.883726	<0.001(raw, 0 outliers)
		MVPA	HDL cholesterol	70	1.22(1.15,1.30)	3.40233e-10		1.12(1.02,1.22)	0.0150336		1.08(0.83,1.40)	0.561292		1.19(0.53,2.67)	0.0002475	77.6467	0.222554	0.338359	0.256(raw, 0 outliers)
		Sedentary commuting	HDL cholesterol	5	0.95(0.80,1.13)	0.579074		0.98(0.84,1.14)	0.774654		1.17(0.65,2.10)	0.641488		0.82(0.46,1.46)	0.533799	8.35186	0.0795069	0.525137	0.237(raw, 0 outliers)
		Smoking initiation	HDL cholesterol	156	0.93(0.89,0.97)	0.000380797		0.93(0.88,0.98)	0.0113981		0.84(0.70,1.01)	0.0589608		0.94(0.43,2.07)	0.0955028	194.898	0.0164386	0.255685	0.017(raw, 0 outliers)
		Alcoholic drinks per week	HDL cholesterol	69	1.27(1.13,1.42)	7.77276e-05		1.29(1.10,1.51)	0.00211769		1.06(0.73,1.55)	0.749725		1.35(0.25,7.40)	0.00290226	97.8577	0.0103109	0.347087	0.012(raw, 0 outliers)
		Coffee intake	HDL cholesterol	64	1.04(0.90,1.21)	0.550958		1.08(0.91,1.28)	0.373885		1.03(0.77,1.38)	0.849314		1.01(0.11,9.49)	0.917703	114.157	<0.001	0.904015	<0.001(raw, 0 outliers)
		Relative carbohydrate intake	HDL cholesterol	23	0.86(0.74,1.00)	0.0562429		0.90(0.73,1.11)	0.317359		0.56(0.28,1.11)	0.113165		0.65(0.21,2.02)	0.052048	28.9276	0.146938	0.222503	0.148(raw, 0 outliers)
		Relative fat intake	HDL cholesterol	17	0.95(0.80,1.12)	0.508536		1.01(0.81,1.27)	0.908287		1.37(0.77,2.44)	0.298775		0.85(0.26,2.78)	0.0816685	18.495	0.29572	0.20557	0.287(raw, 0 outliers)
		Relative protein intake	HDL cholesterol	21	0.84(0.72,0.98)	0.0288536		0.88(0.71,1.08)	0.230592		1.03(0.55,1.91)	0.9313		0.65(0.21,2.03)	0.17275	29.2667	0.0826383	0.511535	0.06(raw, 0 outliers)
		Relative sugar intake	HDL cholesterol	18	0.90(0.73,1.12)	0.356575		0.88(0.71,1.09)	0.242557		1.68(0.65,4.34)	0.304		0.82(0.21,3.11)	0.0622422	36.5182	0.00390891	0.212155	0.004(raw, 0 outliers)
	Replication-analysis	Air pollution
		PM2.5	HDL cholesterol	45	0.91(0.84,0.98)	0.0174584		0.90(0.83,0.98)	0.0191484		0.94(0.75,1.16)	0.556144		0.84(0.37,1.88)	0.0328116	98.8306	<0.001	0.789383	<0.001(raw, 0 outliers)
		PM10	HDL cholesterol	190	1.03(0.99,1.06)	0.0939361		1.01(0.97,1.06)	0.528292		0.97(0.90,1.05)	0.507399		1.03(0.52,2.07)	0.0394106	271.531	<0.001	0.122422	<0.001(raw, 1 outliers)
		NO2	HDL cholesterol	81	1.02(0.97,1.07)	0.5123		1.02(0.95,1.08)	0.609083		0.98(0.86,1.10)	0.700553		1.04(0.52,2.07)	0.126211	115.96	0.00533278	0.473893	<0.001(raw, 0 outliers)
		NOx	HDL cholesterol	55	1.00(0.95,1.05)	0.954202		1.03(0.96,1.11)	0.367089		1.06(0.93,1.22)	0.378122		1.07(0.60,1.91)	0.596808	57.7106	0.339792	0.33188	0.286(raw, 0 outliers)
		Lifestyle factor
		Leisure screen time	HDL cholesterol	231	0.87(0.86,0.89)	9.06596e-54		0.88(0.86,0.90)	4.75e-30		0.88(0.82,0.94)	0.000389966		0.80(0.53,1.20)	2.64e-35	476.846	<0.001	0.734324	<0.001(raw, 2 outliers)
		MVPA	HDL cholesterol	100	1.19(1.14,1.25)	1.31954e-15		1.16(1.12,1.20)	8.14e-17		1.07(0.93,1.22)	0.361728		1.23(0.63,2.41)	7.33e-11	493.316	<0.001	0.088934	<0.001(raw, 13 outliers)
		Sedentary commuting	HDL cholesterol	12	0.99(0.95,1.02)	0.486281		0.98(0.94,1.02)	0.334672		0.97(0.89,1.05)	0.435444		0.95(0.77,1.16)	0.232731	20.0363	0.0448457	0.585729	0.082(raw, 0 outliers)
		Smoking initiation	HDL cholesterol	181	0.94(0.92,0.96)	1.64659e-08		0.95(0.93,0.98)	7.86e-05		0.91(0.83,1.00)	0.0475564		0.86(0.55,1.35)	6.47e-09	423.714	<0.001	0.499986	<0.001(raw, 3 outliers)
		Alcoholic drinks per week	HDL cholesterol	92	1.31(1.24,1.39)	1.07841e-21		1.25(1.17,1.34)	1.31e-10		1.19(1.00,1.41)	0.0503409		1.52(0.64,3.64)	8.46e-17	223.155	<0.001	0.216894	<0.001(raw, 2 outliers)
		Coffee intake	HDL cholesterol	82	0.96(0.89,1.04)	0.285131		0.95(0.87,1.03)	0.189774		0.81(0.63,1.04)	0.105066		0.79(0.27,2.26)	0.0216702	217.36	<0.001	0.171502	<0.001(raw, 2 outliers)
		Relative carbohydrate intake	HDL cholesterol	23	1.00(0.94,1.07)	0.919872		1.00(0.92,1.09)	0.965742		1.02(0.82,1.27)	0.841232		0.90(0.58,1.40)	0.0314712	27.6922	0.186106	0.857407	0.176(raw, 0 outliers)
		Relative fat intake	HDL cholesterol	25	0.98(0.92,1.05)	0.585265		0.97(0.90,1.05)	0.46859		1.02(0.85,1.24)	0.812329		1.02(0.59,1.76)	0.778433	41.4031	0.0150377	0.649164	0.015(raw, 0 outliers)
		Relative protein intake	HDL cholesterol	27	0.90(0.84,0.97)	0.0037377		0.94(0.87,1.03)	0.1661		1.00(0.82,1.22)	0.97139		0.76(0.43,1.35)	0.0127093	53.1569	0.0012948	0.24461	0.003(raw, 0 outliers)
		Relative sugar intake	HDL cholesterol	28	0.94(0.88,1.01)	0.0910366		0.91(0.84,0.98)	0.0122077		1.04(0.85,1.29)	0.699697		0.89(0.74,1.08)	0.254996	57.9961	<0.001	0.334731	0.002(raw, 0 outliers)
	IVs, instrumental variables; OR, odd ratio; CI, condifence interval; MR, Mendelian randomization; MR-PRESSO, Mendelian Randomization Pleiotropy RESidual Sum and Outlier; MVPA, moderate-to-vigorous intensity physical activity during leisure time;

## Sheet: Table S9
	Table S10.Estimates of genetical liability to air pollutants and lifestyle factors on triglycerides in univaribale mendelian randomization*
	Stage	Exposure	outcome	IVs	Inverse variance weighted method			Weighted median method			MR-Egger regression			Contamination mixture method		Cochran's Q	Cochran's Q test, P value	P_intecept	MR-PRESSO Global Test P
					OR (95% CI)	P value		OR (95% CI)	P value		OR (95% CI)	P value		OR (95% CI)	P value
	Discovery-analysis	Air pollution
		PM2.5	Triglycerides	25	1.14(0.97,1.34)	0.109984		1.02(0.82,1.27)	0.858489		1.01(0.49,2.09)	0.976419		1.13(0.37,3.49)	0.371307	20.1471	0.688381	0.741327	0.72(raw, 0 outliers)
		PM10	Triglycerides	90	0.93(0.84,1.03)	0.379604		0.95(0.82,1.10)	0.499526		1.04(0.68,1.58)	0.856058		0.84(0.15,4.72)	0.0685284	134.163	0.00140947	0.65287	0.001(raw, 2 outliers)
		NO2	Triglycerides	45	0.98(0.85,1.14)	0.818432		1.04(0.85,1.26)	0.727674		1.12(0.67,1.90)	0.662259		1.33(0.29,6.19)	0.105041	54.0582	0.142353	0.601237	0.161(raw, 0 outliers)
		NOx	Triglycerides	35	1.18(1.01,1.36)	0.0332447		1.17(0.95,1.44)	0.129848		0.83(0.43,1.60)	0.586412		1.22(0.36,4.16)	0.118851	30.6649	0.631884	0.297096	0.681(raw, 0 outliers)
		Lifestyle factor
		Leisure screen time	Triglycerides	196	1.09(1.05,1.13)	6.4962e-06		1.10(1.04,1.16)	0.000313718		1.00(0.85,1.19)	0.954844		1.19(0.53,2.65)	4.64e-06	257.753	0.001738	0.346709	0.008(raw, 0 outliers)
		MVPA	Triglycerides	65	0.93(0.87,0.98)	0.011876		0.95(0.87,1.03)	0.233031		0.90(0.68,1.21)	0.498545		0.86(0.43,1.73)	0.361767	51.4661	0.870714	0.866325	0.738(raw, 0 outliers)
		Sedentary commuting	Triglycerides	5	1.00(0.85,1.17)	0.966712		0.98(0.84,1.15)	0.807458		0.61(0.42,0.90)	0.0864524		0.99(0.55,1.77)	1	7.2769	0.121959	0.0783164	0.227(raw, 0 outliers)
		Smoking initiation	Triglycerides	156	1.07(1.03,1.12)	0.000402123		1.06(1.00,1.12)	0.0528274		0.99(0.82,1.18)	0.875993		1.14(0.52,2.50)	0.00488489	193.517	0.0194132	0.334502	0.003(raw, 0 outliers)
		Alcoholic drinks per week	Triglycerides	67	0.94(0.83,1.06)	0.294193		1.00(0.85,1.18)	1		1.12(0.73,1.72)	0.620947		0.73(0.16,3.40)	0.114713	88.1527	0.0356643	0.418093	0.057(raw, 0 outliers)
		Coffee intake	Triglycerides	66	0.90(0.79,1.02)	0.105727		0.88(0.74,1.04)	0.136547		0.93(0.72,1.21)	0.609786		0.87(0.11,6.89)	0.190564	104.576	0.00135022	0.735413	0.001(raw, 0 outliers)
		Relative carbohydrate intake	Triglycerides	23	1.22(1.03,1.45)	0.0211378		1.16(0.94,1.43)	0.158296		1.15(0.54,2.45)	0.72784		1.59(0.46,5.53)	0.167623	37.5733	0.0204463	0.864018	0.016(raw, 0 outliers)
		Relative fat intake	Triglycerides	17	1.01(0.85,1.19)	0.947702		1.07(0.86,1.35)	0.536258		0.62(0.27,1.45)	0.289364		1.14(0.51,2.55)	0.199132	10.6206	0.832276	0.274456	0.809(raw, 0 outliers)
		Relative protein intake	Triglycerides	18	1.12(0.95,1.31)	0.177367		1.11(0.88,1.39)	0.377229		1.24(0.62,2.48)	0.552482		1.33(0.50,3.53)	0.142143	18.4685	0.359877	0.764163	0.348(raw, 0 outliers)
		Relative sugar intake	Triglycerides	18	1.16(0.93,1.46)	0.186452		1.43(1.15,1.78)	0.00152527		1.50(0.52,4.34)	0.461277		1.55(0.42,5.72)	0.00766499	20.9288	0.181265	0.634046	<0.001(raw, 1 outliers)
	Replication-analysis	Air pollution
		PM2.5	Triglycerides	39	1.05(0.98,1.14)	0.157803		1.05(0.96,1.14)	0.276822		1.14(0.94,1.39)	0.196856		1.04(0.49,2.22)	0.407165	61.4594	0.00935489	0.403223	<0.001(raw, 1 outliers)
		PM10	Triglycerides	169	0.97(0.94,1.00)	0.0543048		0.98(0.93,1.02)	0.34354		1.01(0.94,1.08)	0.748666		0.90(0.50,1.60)	0.228144	153.521	0.781465	0.193986	0.919(raw, 0 outliers)
		NO2	Triglycerides	82	0.97(0.92,1.03)	0.342094		0.96(0.89,1.02)	0.189714		1.04(0.91,1.18)	0.592626		0.97(0.48,1.99)	0.450363	119.82	0.00330268	0.310268	0.003(raw, 0 outliers)
		NOx	Triglycerides	49	1.08(1.03,1.14)	0.00350246		1.08(1.00,1.17)	0.0410795		1.12(0.96,1.30)	0.157513		1.20(0.70,2.07)	0.00281319	41.5607	0.732448	0.669534	0.728(raw, 0 outliers)
		Lifestyle factor
		Leisure screen time	Triglycerides	230	1.15(1.13,1.17)	1.21805e-57		1.13(1.10,1.15)	1.7e-28		1.09(1.02,1.17)	0.0104191		1.25(0.83,1.87)	9.26e-35	423.178	<0.001	0.108636	<0.001(raw, 0 outliers)
		MVPA	Triglycerides	81	0.89(0.87,0.92)	8.37073e-21		0.91(0.88,0.94)	5.44e-09		0.95(0.89,1.02)	0.136713		0.85(0.61,1.19)	1.88e-10	87.457	0.266154	0.0680938	0.338(raw, 0 outliers)
		Sedentary commuting	Triglycerides	13	1.03(0.99,1.07)	0.189159		1.05(1.00,1.09)	0.0350018		1.09(1.00,1.20)	0.0782342		1.08(0.85,1.36)	0.00305571	27.0562	0.00758442	0.166964	0.012(raw, 1 outliers)
		Smoking initiation	Triglycerides	176	1.08(1.06,1.11)	4.11952e-13		1.07(1.05,1.10)	6.87e-08		1.07(0.97,1.17)	0.157832		1.13(0.71,1.79)	2.37e-08	384.711	<0.001	0.761341	<0.001(raw, 3 outliers)
		Alcoholic drinks per week	Triglycerides	84	0.88(0.83,0.93)	1.00666e-06		0.87(0.81,0.92)	9.74e-06		0.85(0.71,1.03)	0.100863		0.85(0.40,1.80)	0.000632326	130.136	<0.001	0.759383	<0.001(raw, 0 outliers)
		Coffee intake	Triglycerides	87	0.99(0.92,1.06)	0.799952		0.94(0.87,1.01)	0.0986481		1.00(0.85,1.17)	0.986482		1.19(0.41,3.49)	0.000609057	218.485	<0.001	0.920341	<0.001(raw, 0 outliers)
		Relative carbohydrate intake	Triglycerides	27	1.17(1.10,1.24)	7.83708e-07		1.15(1.06,1.24)	0.000913387		1.11(0.94,1.30)	0.231776		1.28(0.81,2.04)	0.000261419	32.4578	0.178415	0.501138	0.214(raw, 0 outliers)
		Relative fat intake	Triglycerides	22	1.02(0.95,1.10)	0.515135		1.02(0.94,1.12)	0.584111		0.98(0.79,1.21)	0.837825		1.02(0.61,1.70)	0.672352	29.8027	0.0960242	0.654342	0.094(raw, 0 outliers)
		Relative protein intake	Triglycerides	23	0.96(0.89,1.04)	0.295378		0.94(0.85,1.03)	0.157586		0.85(0.71,1.01)	0.0863342		0.87(0.51,1.49)	0.00872742	35.8909	0.0311937	0.151996	0.039(raw, 0 outliers)
		Relative sugar intake	Triglycerides	29	1.03(0.96,1.10)	0.443039		0.99(0.92,1.07)	0.774734		0.90(0.72,1.12)	0.342414		0.99(0.57,1.72)	0.662555	56.0347	0.0012739	0.219775	0.003(raw, 0 outliers)
	IVs, instrumental variables; OR, odd ratio; CI, condifence interval; MR, Mendelian randomization; MR-PRESSO, Mendelian Randomization Pleiotropy RESidual Sum and Outlier; MVPA, moderate-to-vigorous intensity physical activity during leisure time;

[truncated: 14 more sheets: Table S10, Table S11, Table S12, Table S13, Table S14, Table S15, Table S16, Table S17, Table S18, Table S19, Table S20, Table S21, Table S22, Table S23]
